# Supplementary material for: New Diarylamine KV10.1 Inhibitors and Their Anticancer Potential
Source: MDPI journal article supplement (doi:10.3390/pharmaceutics14091963), 2022-09-17

# Supplementary Materials: New Diarylamine Kv10.1 Inhibitors and Their Anticancer Potential

Špela Gubič, Žan Toplak, Xiaoyi Shi, Jaka Dernovšek, Louise Antonia Hendrickx, Ernesto Lopes Pinheiro-Junior, Steve Peigneur, Jan Tytgat, Luis A. Pardo, Lucija Peterlin Mašič and Tihomir Tomašič

## 1. Supplementary tables

**Table S1.** Kv1.3 inhibitory potencies on *Xenopus laevis* oocytes of newly designed and synthesised ZVS-08 (1) analogues (Strategy I), voltage-clamped to determine the percentage of inhibition at 10  $\mu$ M.

| Strategy I  |                                                                                     |                                                                          |
|-------------|-------------------------------------------------------------------------------------|--------------------------------------------------------------------------|
|             | 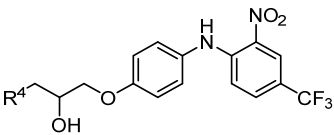   |                                                                          |
| Compound ID | R <sup>4</sup>                                                                      | % of Kv10.1 inhibition at 10 $\mu$ M<br>( <i>Xenopus laevis</i> oocytes) |
| 16d         |  | 0%                                                                       |

**Table S2.** Kv1.3 inhibitory potencies on *Xenopus laevis* oocytes of newly designed and synthesised ZVS-08 (**1**) analogues (Strategy II), voltage-clamped to determine the percentage of inhibition at 10  $\mu$ M on Kv10.1 and hERG.

| Compound ID | R <sup>1</sup> | R <sup>2</sup>     | R <sup>3</sup>  | R <sup>4</sup>                                                                      | % of Kv10.1<br>inhibition at 10 $\mu$ M<br>( <i>Xenopus laevis</i><br>oocytes)t | % of hERG<br>inhibition at 10 $\mu$ M<br>( <i>Xenopus laevis</i><br>oocytes)t |
|-------------|----------------|--------------------|-----------------|-------------------------------------------------------------------------------------|---------------------------------------------------------------------------------|-------------------------------------------------------------------------------|
| <b>5a</b>   | O              | COOCH <sub>3</sub> | H               |    | -4.54 % $\pm$ 2.92                                                              | 14.99% $\pm$ 0.36                                                             |
| <b>5b</b>   | O              | NO <sub>2</sub>    | CF <sub>3</sub> |    | 24.89% $\pm$ 5.54                                                               | 11.46% $\pm$ 2.33                                                             |
| <b>5c</b>   | NHCO           | NO <sub>2</sub>    | CF <sub>3</sub> |    | -0.66% $\pm$ 0.78                                                               | 21.47% $\pm$ 6.02                                                             |
| <b>5d</b>   | NH             | COOCH <sub>3</sub> | H               |    | -2.11% $\pm$ 1.50                                                               | 20.43% $\pm$ 3.19                                                             |
| <b>5e</b>   | NH             | COOCH <sub>3</sub> | CF <sub>3</sub> |    | -2.17% $\pm$ 3.06                                                               | 37.32% $\pm$ 13.11                                                            |
| <b>5f</b>   | NH             | NO <sub>2</sub>    | NO <sub>2</sub> |    | 41.31% $\pm$ 2.54                                                               | 65.85% $\pm$ 1.01                                                             |
| <b>6a</b>   | O              | NO <sub>2</sub>    | CF <sub>3</sub> |    | 23.66% $\pm$ 1.76                                                               | 69.14% $\pm$ 1.87                                                             |
| <b>6b</b>   | NHCO           | NO <sub>2</sub>    | CF <sub>3</sub> |    | -0.41% $\pm$ 6.31                                                               | 9.83% $\pm$ 5.36                                                              |
| <b>6c</b>   | NH             | COOCH <sub>3</sub> | CF <sub>3</sub> |   | 9.91% $\pm$ 1.77                                                                | 63.66% $\pm$ 1.72                                                             |
| <b>6d</b>   | NH             | NO <sub>2</sub>    | NO <sub>2</sub> |  | 44.15% $\pm$ 5.59                                                               | 74.33% $\pm$ 5.28                                                             |
| <b>10a</b>  | NH             | COOH               | H               |  | 12.97% $\pm$ 1.20                                                               | 3.42% $\pm$ 5.17                                                              |
| <b>10b</b>  | NH             | COOH               | CF <sub>3</sub> |  | 15.66% $\pm$ 6.79                                                               | 14.71% $\pm$ 4.82                                                             |

**Table S3.** Kv1.3 inhibitory potencies on *Xenopus laevis* oocytes of newly designed and synthesised ZVS-08 (1) analogues (Strategy II), voltage-clamped to determine the percentage of inhibition at 10  $\mu$ M on Kv10.1 and hERG.

| Compound ID | Structure                                                                         | % of Kv10.1 inhibition at 10 $\mu$ M ( <i>Xenopus laevis</i> oocytes)t | % of hERG inhibition at 10 $\mu$ M ( <i>Xenopus laevis</i> oocytes)t |
|-------------|-----------------------------------------------------------------------------------|------------------------------------------------------------------------|----------------------------------------------------------------------|
| 14          | 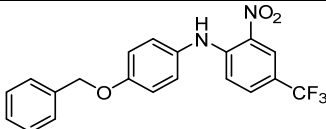 | -1.18% $\pm$ 0.71                                                      | 4.23% $\pm$ 4.72                                                     |
| 15          |  | 39.92% $\pm$ 0.98                                                      | 58.58% $\pm$ 6.58                                                    |

**Table S4.** Kv1.3 inhibitory potencies on *Xenopus laevis* oocytes of newly designed and synthesised ZVS-08 (1) analogues (Strategy IV), voltage-clamped to determine the percentage of inhibition at 10  $\mu$ M on Kv10.1 and hERG.

| Strategy IV                                                                        |                                                                                     |                                                                        |                                                                      |
|------------------------------------------------------------------------------------|-------------------------------------------------------------------------------------|------------------------------------------------------------------------|----------------------------------------------------------------------|
| 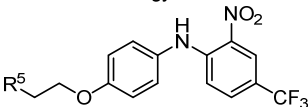 |                                                                                     |                                                                        |                                                                      |
| Compound ID                                                                        | R <sub>5</sub>                                                                      | % of Kv10.1 inhibition at 10 $\mu$ M ( <i>Xenopus laevis</i> oocytes)t | % of hERG inhibition at 10 $\mu$ M ( <i>Xenopus laevis</i> oocytes)t |
| 13                                                                                 |  | 22.58% $\pm$ 4.57                                                      | 34.69% $\pm$ 7.67                                                    |
| 17a                                                                                |  | 63.50% $\pm$ 0.33<br>IC <sub>50</sub> = 3.58 $\pm$ 1.50 $\mu$ M        | 64.49% $\pm$ 6.43<br>IC <sub>50</sub> = 2.01 $\pm$ 0.65 $\mu$ M      |
| 18a                                                                                |  | 41.68% $\pm$ 2.26<br>IC <sub>50</sub> = 11.63 $\pm$ 0.35 $\mu$ M       | 65.16% $\pm$ 8.48<br>IC <sub>50</sub> = 7.56 $\pm$ 0.41 $\mu$ M      |
| 19                                                                                 |  | 55.66% $\pm$ 1.95                                                      | 65.91% $\pm$ 7.63                                                    |
| 20                                                                                 |  | 36.28% $\pm$ 9.00<br>IC <sub>50</sub> = 12.93 $\pm$ 0.04 $\mu$ M       | 75.61% $\pm$ 1.77<br>IC <sub>50</sub> = 0.59 $\pm$ 0.01 $\mu$ M      |
| 21                                                                                 |  | 43.35% $\pm$ 1.33<br>IC <sub>50</sub> = 13.34 $\pm$ 1.89 $\mu$ M       | 77.45 $\pm$ 5.71<br>IC <sub>50</sub> = 1.34 $\pm$ 0.32 $\mu$ M       |

**Table S5.** Kv1.3 inhibitory potencies on *Xenopus laevis* oocytes of newly designed and synthesised ZVS-08 (**1**) analogues (Strategy V), voltage-clamped to determine the percentage of inhibition at 10  $\mu$ M on Kv10.1 and hERG.

| Strategy V                                                                         |                                                                                   |                |                                                                                       |                                                                                     |
|------------------------------------------------------------------------------------|-----------------------------------------------------------------------------------|----------------|---------------------------------------------------------------------------------------|-------------------------------------------------------------------------------------|
| 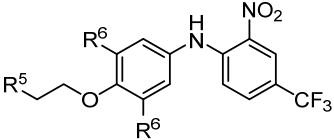 |                                                                                   |                |                                                                                       |                                                                                     |
| Compound ID                                                                        | R <sub>5</sub>                                                                    | R <sub>6</sub> | % of Kv10.1 inhibition at 10 $\mu$ M<br>( <i>Xenopus laevis</i> oocytes) <sup>t</sup> | % of hERG inhibition at 10 $\mu$ M<br>( <i>Xenopus laevis</i> oocytes) <sup>t</sup> |
| <b>17b</b>                                                                         |  | Br             | 19.52% $\pm$ 4.90                                                                     | 60.13% $\pm$ 4.79                                                                   |
| <b>17c</b>                                                                         |  | Cl             | 9.21% $\pm$ 2.42                                                                      | 54.69% $\pm$ 7.36                                                                   |
| <b>18b</b>                                                                         |  | Br             | 25.99% $\pm$ 4.04                                                                     | 66.82% $\pm$ 11.56                                                                  |
| <b>18c</b>                                                                         |  | Cl             | 58.24% $\pm$ 2.23                                                                     | 76.76% $\pm$ 4.16                                                                   |
|                                                                                    |                                                                                   |                | IC <sub>50</sub> = <b>19.05 <math>\pm</math> 2.85 <math>\mu</math>M</b>               | IC <sub>50</sub> = <b>0.66 <math>\pm</math> 0.27 <math>\mu</math>M</b>              |

## 2. Representative $^1\text{H}$ NMR, $^{13}\text{C}$ NMR spectra and HRMS data

### Methyl 2-(4-hydroxyphenoxy)benzoate (3a)

$^1\text{H}$  NMR (400 MHz,  $\text{CDCl}_3$ )  $\delta$  7.87 (dd,  $J_1 = 7.8$  Hz,  $J_2 = 1.8$  Hz, 1H), 7.44 – 7.37 (m, 1H), 7.11 (td,  $J_1 = 7.7$  Hz,  $J_2 = 1.0$  Hz, 1H), 6.91 – 6.85 (m, 3H), 6.83 – 6.78 (m, 2H), 4.90 (brs, 1H), 3.86 (s, 3H).

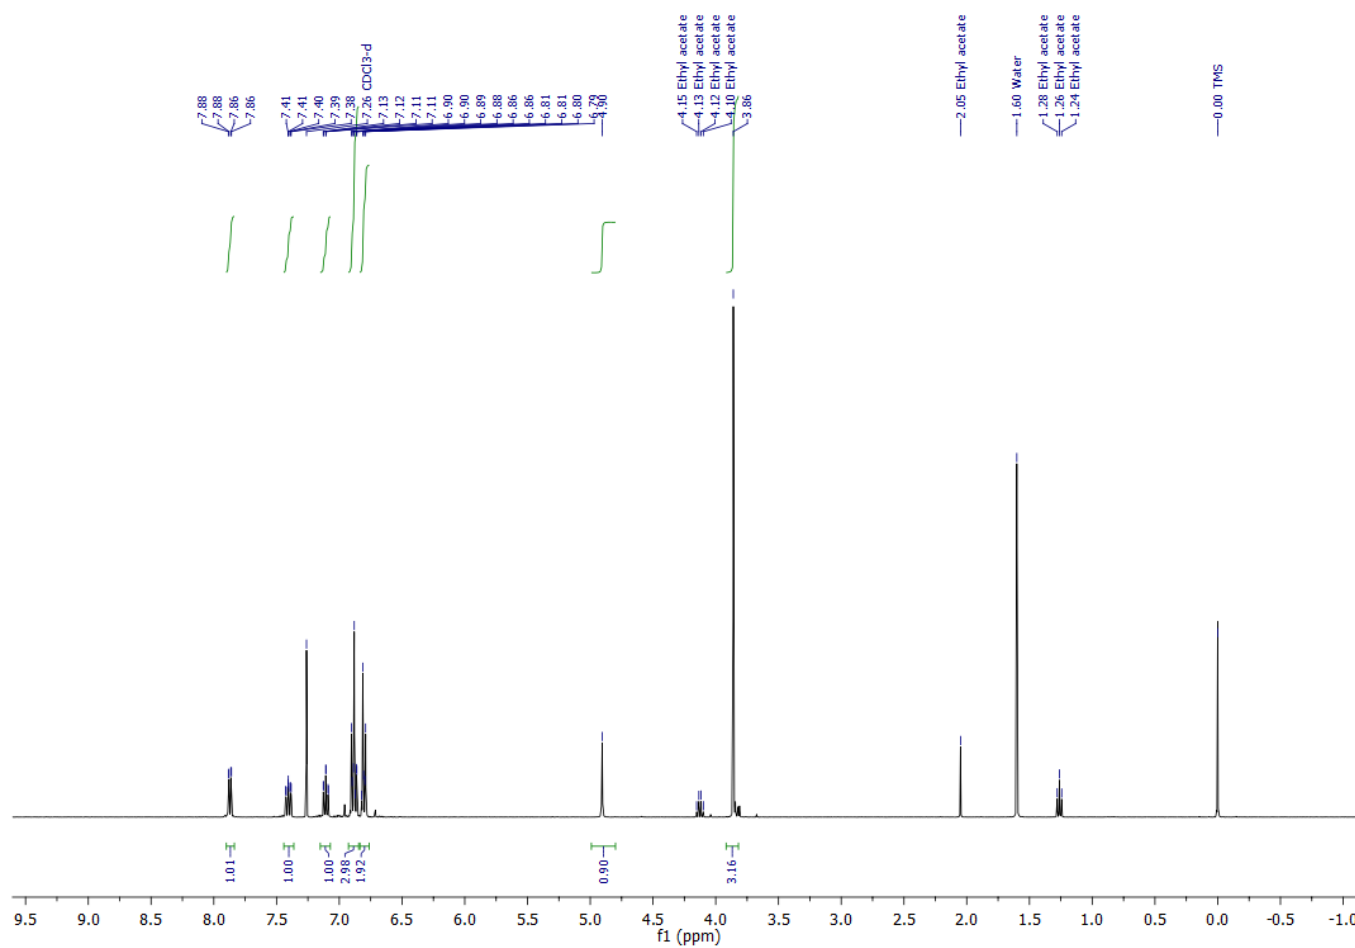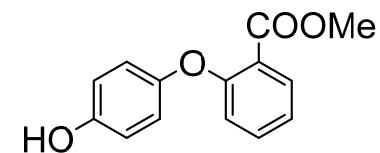

**4-(2-Nitro-4-(trifluoromethyl)phenoxy)phenol (3b)**

$^1\text{H}$  NMR (400 MHz,  $\text{CDCl}_3$ )  $\delta$  8.21 (d,  $J = 2.0$  Hz, 1H), 7.73 – 7.62 (m, 1H), 7.03 – 6.96 (m, 3H), 6.95 – 6.87 (m, 2H), 6.22 (brs, 1H)

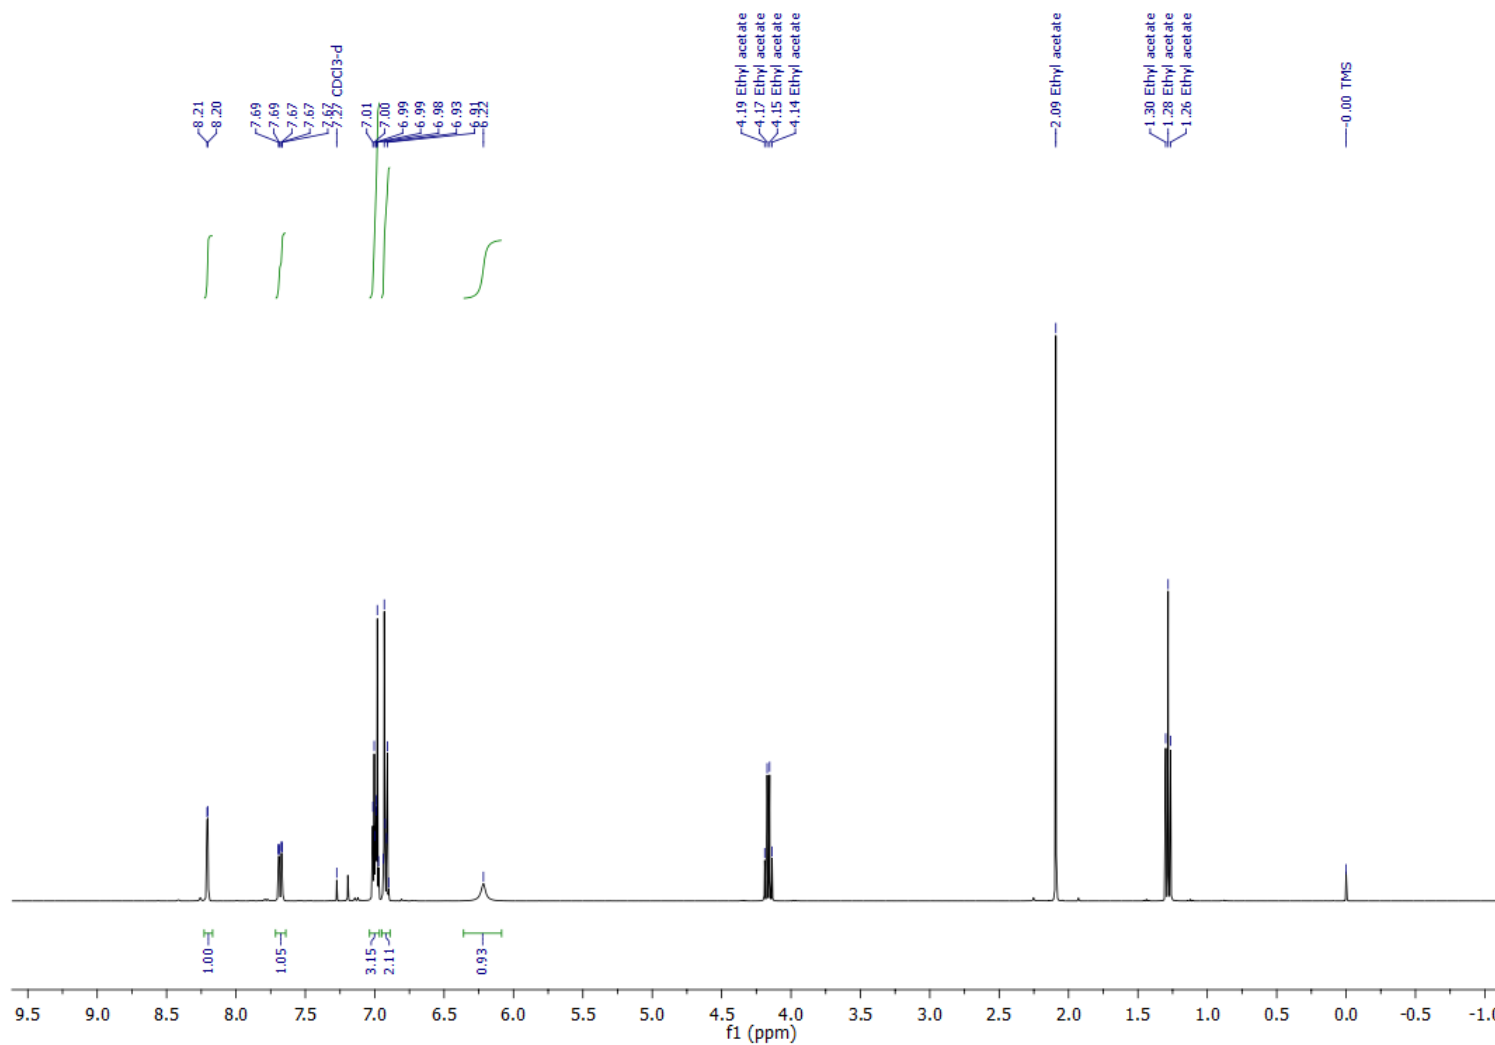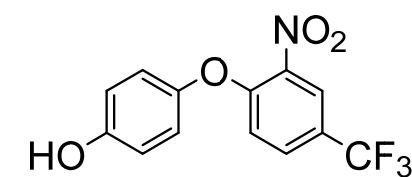

**Methyl 2-(4-(oxiran-2-ylmethoxy)phenoxy)benzoate (4a)**

$^1\text{H}$  NMR (400 MHz,  $\text{CDCl}_3$ )  $\delta$  7.88 (dd,  $J_1 = 7.8$  Hz,  $J_2 = 1.8$  Hz, 1H), 7.41 (ddd,  $J_1 = 8.3$  Hz,  $J_2 = 7.4$  Hz,  $J_3 = 1.8$  Hz, 1H), 7.12 (td,  $J_1 = 7.7$  Hz,  $J_2 = 1.1$  Hz, 1H), 6.98 – 6.85 (m, 5H), 4.21 (dd,  $J_1 = 11.0$  Hz,  $J_2 = 3.1$  Hz, 1H), 3.93 (dd,  $J_1 = 11.0$  Hz,  $J_2 = 5.7$  Hz, 1H), 3.85 (s, 3H), 3.35 (ddt,  $J_1 = 5.7$  Hz,  $J_2 = 4.1$  Hz,  $J_3 = 3.0$  Hz, 1H), 2.91 (dd,  $J_1 = 4.9$  Hz,  $J_2 = 4.2$  Hz, 1H), 2.76 (dd,  $J_1 = 4.9$  Hz,  $J_2 = 2.7$  Hz, 1H).

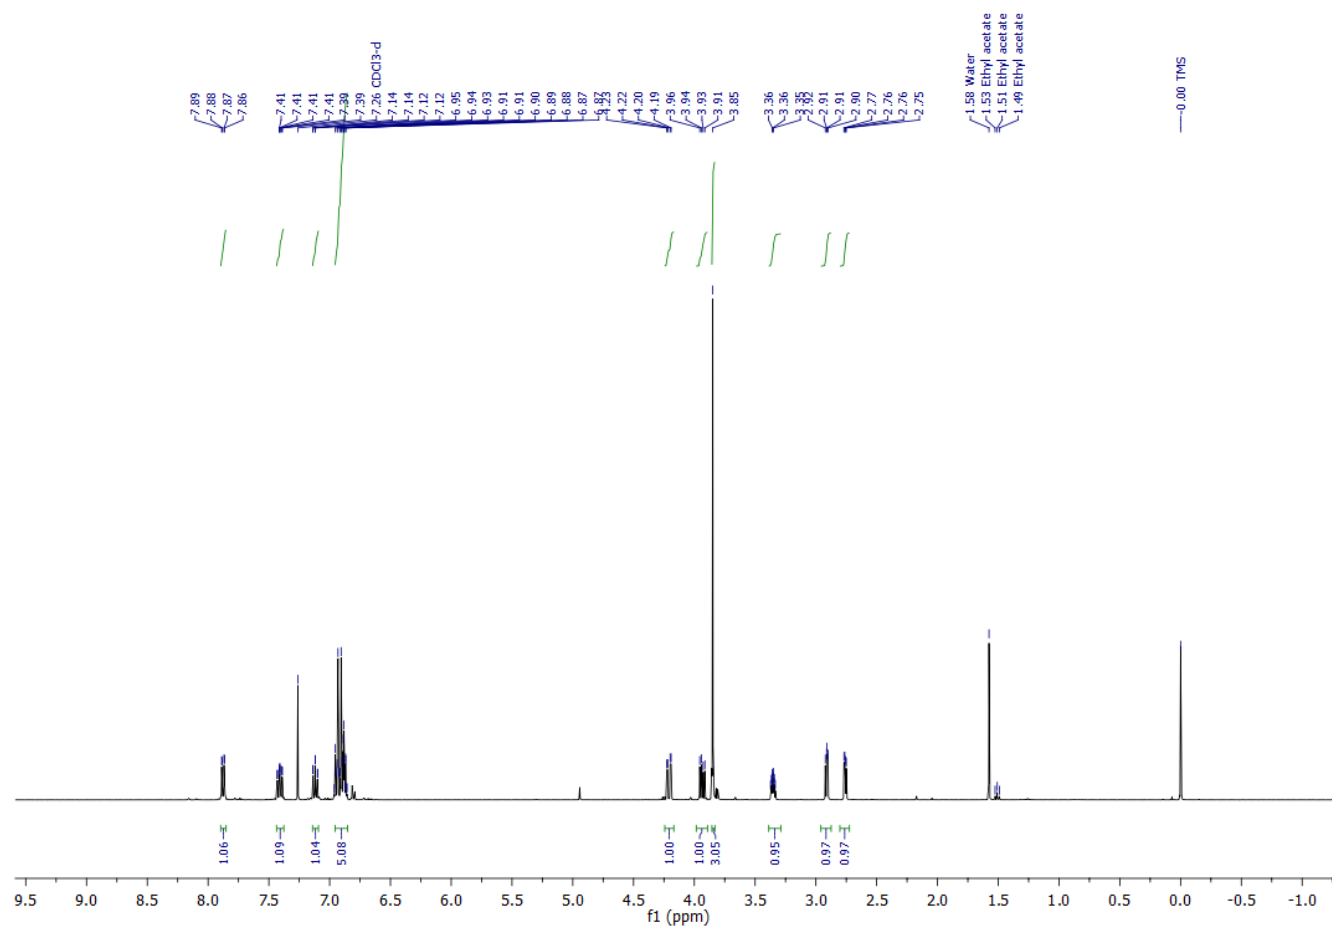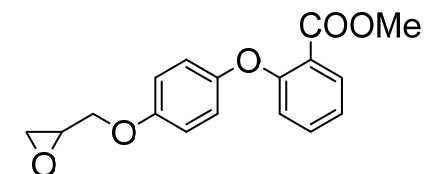

**2-((4-(2-Nitro-4-(trifluoromethyl)phenoxy)phenoxy)methyl)oxirane (4b)**

$^1\text{H}$  NMR (400 MHz, DMSO)  $\delta$  8.44 (d,  $J$  = 2.0 Hz, 1H), 8.02 – 7.92 (m, 1H), 7.24 – 7.15 (m, 2H), 7.13 – 7.03 (m, 3H), 4.36 (dd,  $J_1$  = 11.4 Hz,  $J_2$  = 2.6 Hz, 1H), 3.86 (dd,  $J_1$  = 11.4 Hz,  $J_2$  = 6.6 Hz, 1H), 3.37 – 3.33 (m, 1H), 2.86 (dd,  $J_1$  = 5.0 Hz,  $J_2$  = 4.3 Hz, 1H), 2.72 (dd,  $J_1$  = 5.1 Hz,  $J_2$  = 2.7 Hz, 1H).

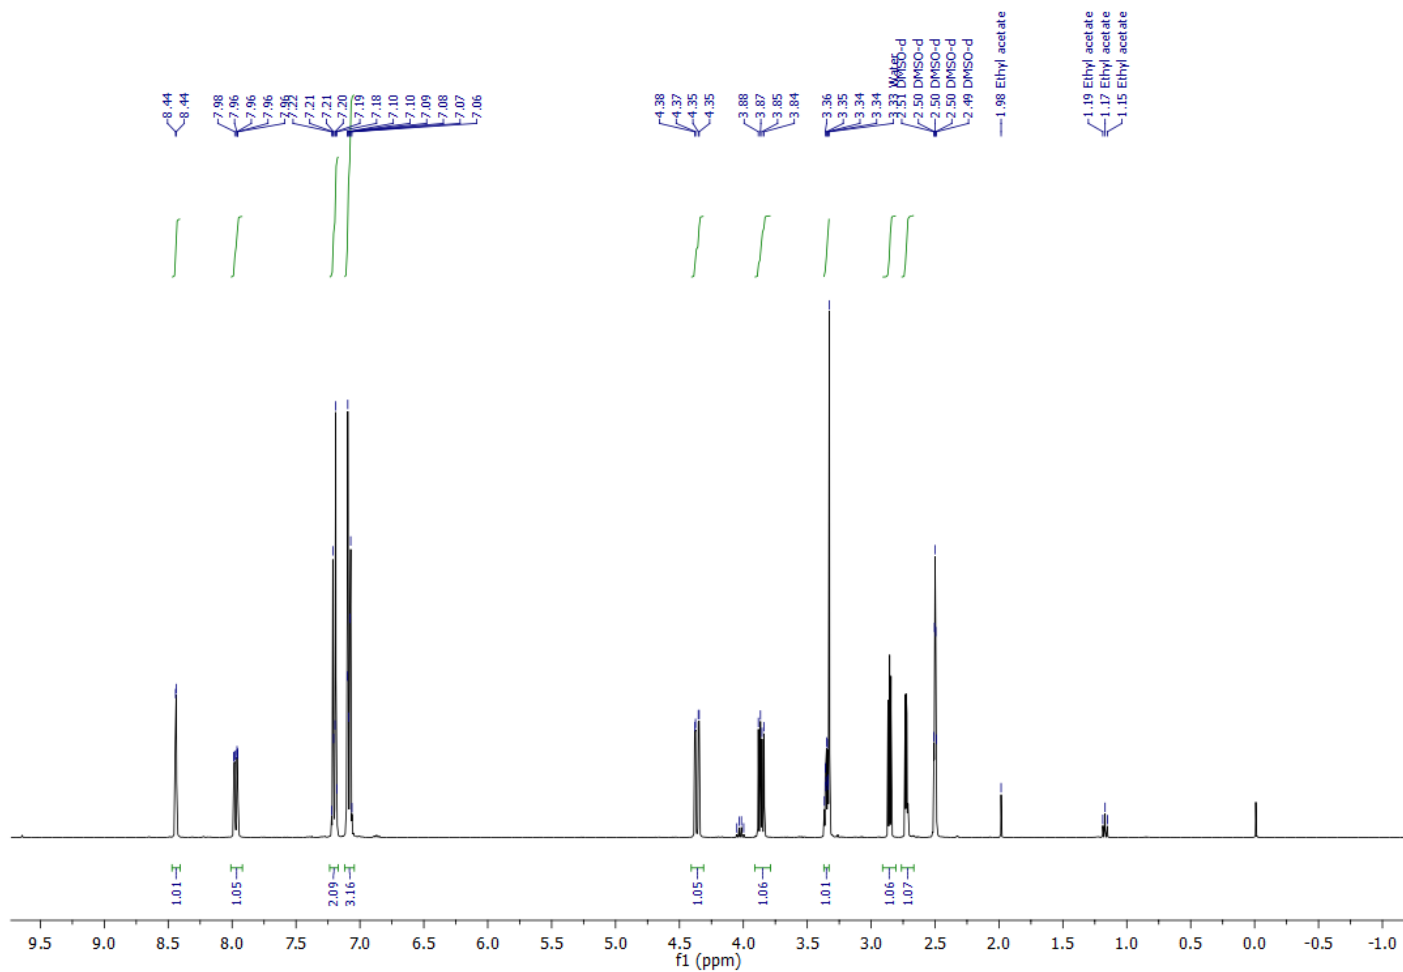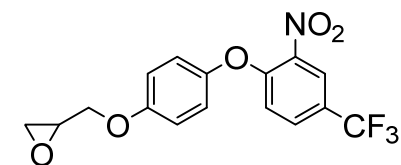



**2-Nitro-*N*-(4-(oxiran-2-ylmethoxy)phenyl)-4-(trifluoromethyl)benzamide (4c)**

$^1\text{H}$  NMR (400 MHz, DMSO)  $\delta$  10.66 (s, 1H), 8.50 (s, 1H), 8.28 (dd,  $J_1 = 8.0$  Hz,  $J_2 = 1.1$  Hz, 1H), 8.03 (d,  $J = 7.9$  Hz, 1H), 7.65 – 7.51 (m, 2H), 7.04 – 6.92 (m, 2H), 4.32 (dd,  $J_1 = 11.4$  Hz,  $J_2 = 2.7$  Hz, 1H), 3.82 (dd,  $J_1 = 11.4$  Hz,  $J_2 = 6.5$  Hz, 1H), 3.36 – 3.33 (m, 1H), 2.87 – 2.81 (m, 1H), 2.71 (dd,  $J_1 = 5.1$  Hz,  $J_2 = 2.7$  Hz, 1H).

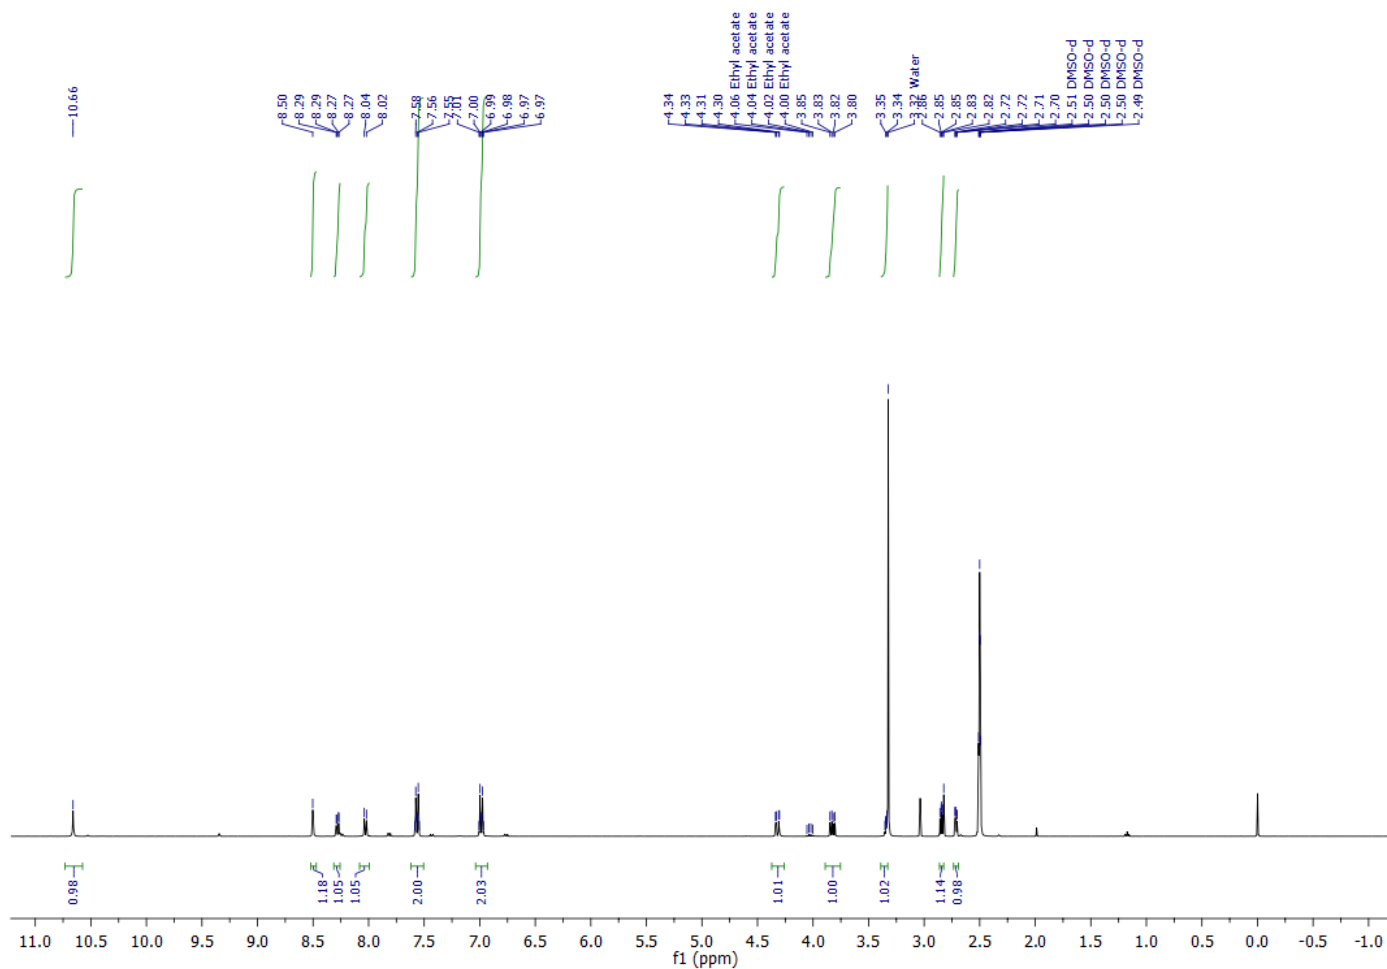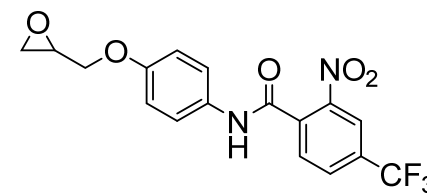

**Methyl 2-((4-(oxiran-2-ylmethoxy)phenyl)amino)benzoate (4d)**

$^1\text{H}$  NMR (400 MHz, DMSO)  $\delta$  9.17 (s, 1H), 7.86 (dd,  $J_1 = 8.0$  Hz,  $J_2 = 1.5$  Hz, 1H), 7.34 (ddd,  $J_1 = 8.6$  Hz,  $J_2 = 7.2$  Hz,  $J_3 = 1.6$  Hz, 1H), 7.22 – 7.15 (m, 2H), 7.02 – 6.96 (m, 2H), 6.95 (dd,  $J_1 = 8.5$  Hz,  $J_2 = 0.7$  Hz, 1H), 6.71 (ddd,  $J_1 = 8.1$  Hz,  $J_2 = 7.1$  Hz,  $J_3 = 1.1$  Hz, 1H), 4.32 (dd,  $J_1 = 11.4$  Hz,  $J_2 = 2.7$  Hz, 1H), 3.84 (s, 3H), 3.88 – 3.82 (m, 1H), 3.39 – 3.28 (m, 1H), 2.85 (dd,  $J_1 = 5.0$  Hz,  $J_2 = 4.3$  Hz, 1H), 2.71 (dd,  $J_1 = 5.1$  Hz,  $J_2 = 2.7$  Hz, 1H).

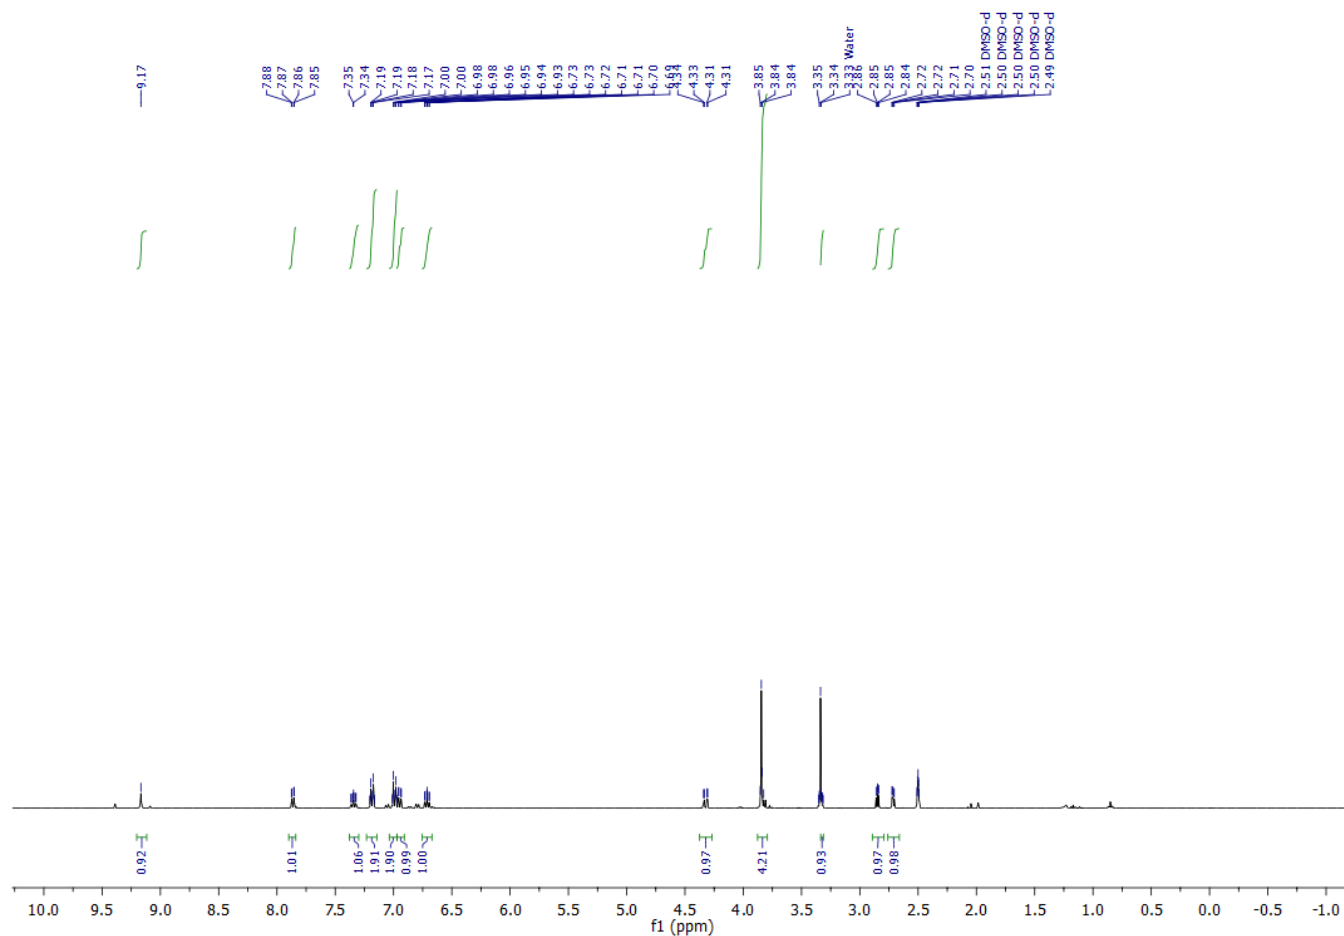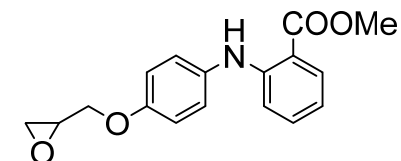

**Methyl 2-((4-(oxiran-2-ylmethoxy)phenyl)amino)-5-(trifluoromethyl)benzoate (4e)**

$^1\text{H}$  NMR (400 MHz, DMSO)  $\delta$  9.49 (s, 1H), 8.10 (d,  $J = 1.7$  Hz, 1H), 7.63 (dd,  $J_1 = 9.0$  Hz,  $J_2 = 2.3$  Hz, 1H), 7.29 – 7.19 (m, 2H), 7.08 – 7.00 (m, 2H), 6.97 (d,  $J = 9.0$  Hz, 1H), 4.35 (dd,  $J_1 = 11.4$  Hz,  $J_2 = 2.6$  Hz, 1H), 3.89 (s, 3H), 3.88 – 3.80 (m, 1H), 3.40 – 3.33 (m, 1H), 2.86 (dd,  $J_1 = 5.0$  Hz,  $J_2 = 4.3$  Hz, 1H), 2.72 (dd,  $J_1 = 5.1$  Hz,  $J_2 = 2.7$  Hz, 1H).

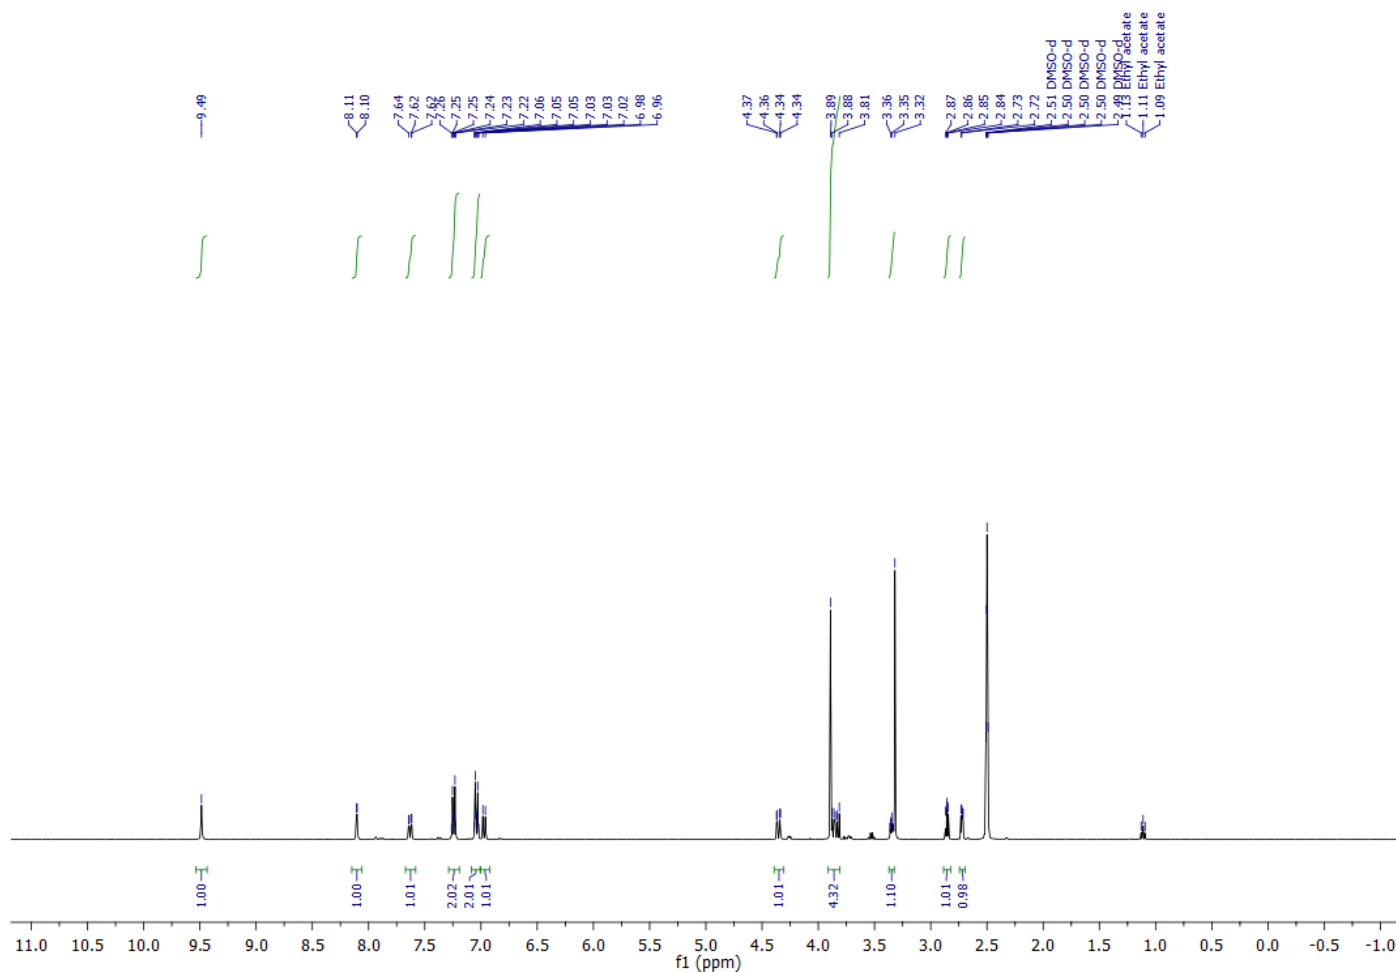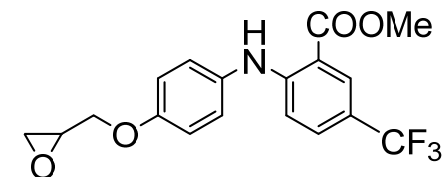

**2-Nitro-*N*-(4-(oxiran-2-ylmethoxy)phenyl)-4-(trifluoromethyl)aniline (4f)**

$^1\text{H}$  NMR (400 MHz,  $\text{CDCl}_3$ )  $\delta$  9.61 (s, 1H), 8.50 (d,  $J = 1.1$  Hz, 1H), 7.50 (dd,  $J_1 = 9.1$  Hz,  $J_2 = 2.1$  Hz, 1H), 7.24 – 7.15 (m, 2H), 7.10 – 6.95 (m, 3H), 4.31 (dd,  $J_1 = 11.1$  Hz,  $J_2 = 2.9$  Hz, 1H), 3.98 (dd,  $J_1 = 11.1$  Hz,  $J_2 = 5.8$  Hz, 1H), 3.46 – 3.32 (m, 1H), 3.00 – 2.91 (m, 1H), 2.79 (dd,  $J_1 = 4.9$  Hz,  $J_2 = 2.7$  Hz, 1H).

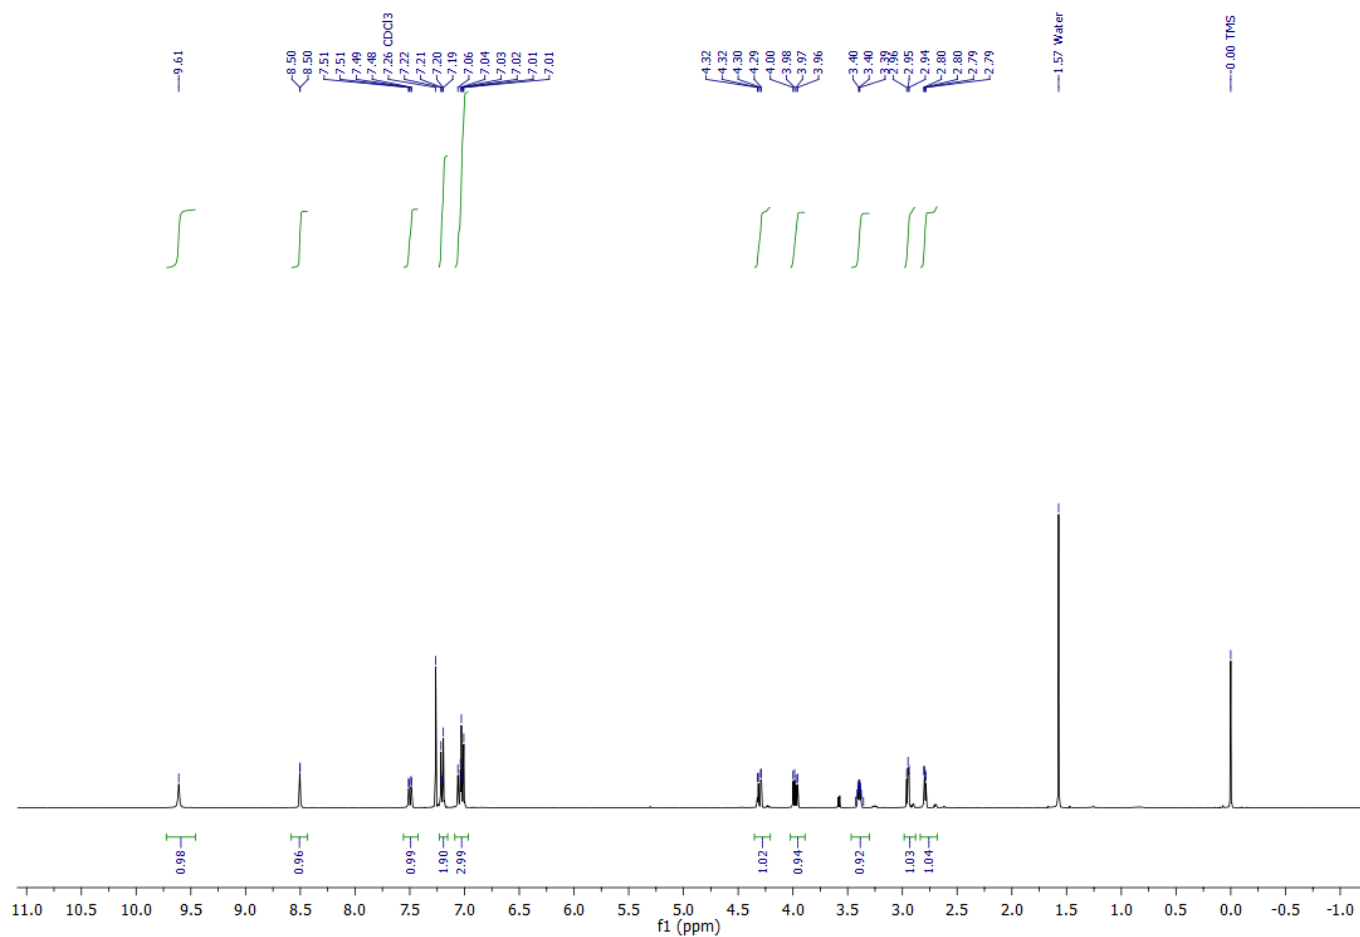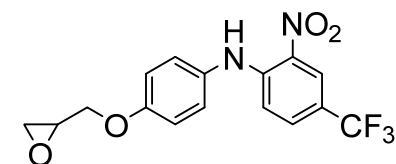

## 2,4-Dinitro-*N*-(4-(oxiran-2-ylmethoxy)phenyl)aniline (4g)

$^1\text{H}$  NMR (400 MHz, DMSO)  $\delta$  10.10 (s, 1H), 8.89 (d,  $J = 2.7$  Hz, 1H), 8.20 (dd,  $J_1 = 9.6$  Hz,  $J_2 = 2.8$  Hz, 1H), 7.38 – 7.23 (m, 2H), 7.16 – 7.04 (m, 2H), 6.96 (d,  $J = 9.6$  Hz, 1H), 4.39 (dd,  $J_1 = 11.4$  Hz,  $J_2 = 2.6$  Hz, 1H), 3.88 (dd,  $J_1 = 11.4$  Hz,  $J_2 = 6.6$  Hz, 1H), 3.43 – 3.32 (m, 1H), 2.87 (dd,  $J_1 = 5.0$  Hz,  $J_2 = 4.3$  Hz, 1H), 2.73 (dd,  $J_1 = 5.1$ ,  $J_2 = 2.7$  Hz, 1H).

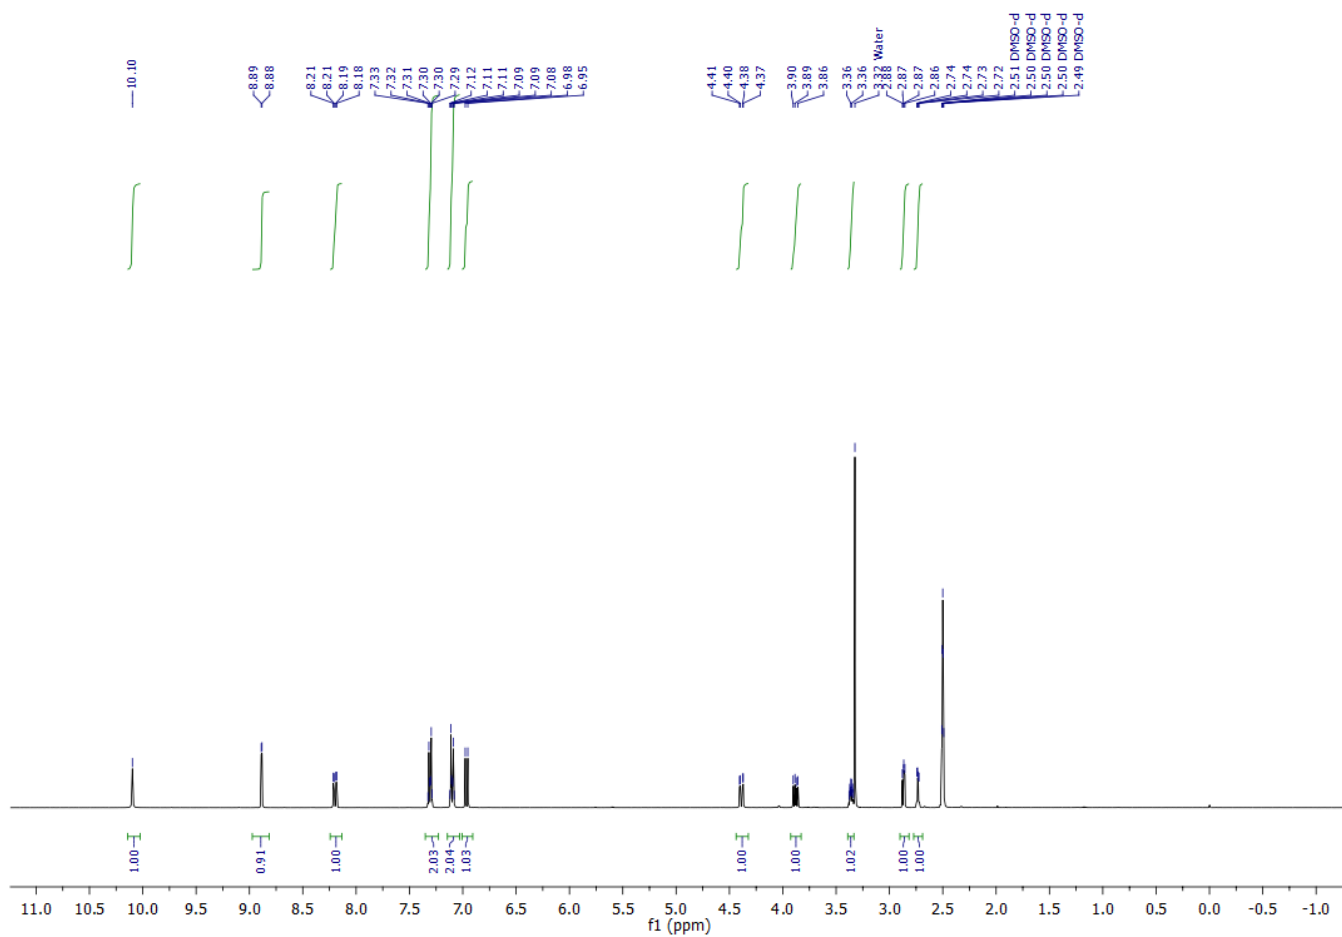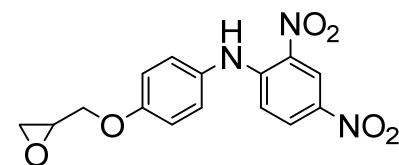

**Methyl 2-(4-(2-hydroxy-3-morpholinopropoxy)phenoxy)benzoate (5a)**

<sup>1</sup>H NMR (400 MHz, MeOD) δ 7.82 (dd, *J*<sub>1</sub> = 7.8 Hz, *J*<sub>2</sub> = 1.7 Hz, 1H), 7.45 (ddd, *J*<sub>1</sub> = 8.4 Hz, *J*<sub>2</sub> = 7.4 Hz, *J*<sub>3</sub> = 1.8 Hz, 1H), 7.13 (td, *J*<sub>1</sub> = 7.7 Hz, *J*<sub>2</sub> = 1.0 Hz, 1H), 6.99–6.88 (m, 4H), 6.85 (dd, *J*<sub>1</sub> = 8.3 Hz, *J*<sub>2</sub> = 0.8 Hz, 1H), 4.87 (brs, 1H), 4.12 (ddd, *J*<sub>1</sub> = 9.2 Hz, *J*<sub>2</sub> = 7.4 Hz, *J*<sub>3</sub> = 5.3 Hz, 1H), 3.99 (dd, *J*<sub>1</sub> = 9.7 Hz, *J*<sub>2</sub> = 4.1 Hz, 1H), 3.91 (dd, *J*<sub>1</sub> = 9.8 Hz, *J*<sub>2</sub> = 5.9 Hz, 1H), 3.80 (s, 3H), 3.74–3.60 (m, 4H), 2.62–2.47 (m, 6H)

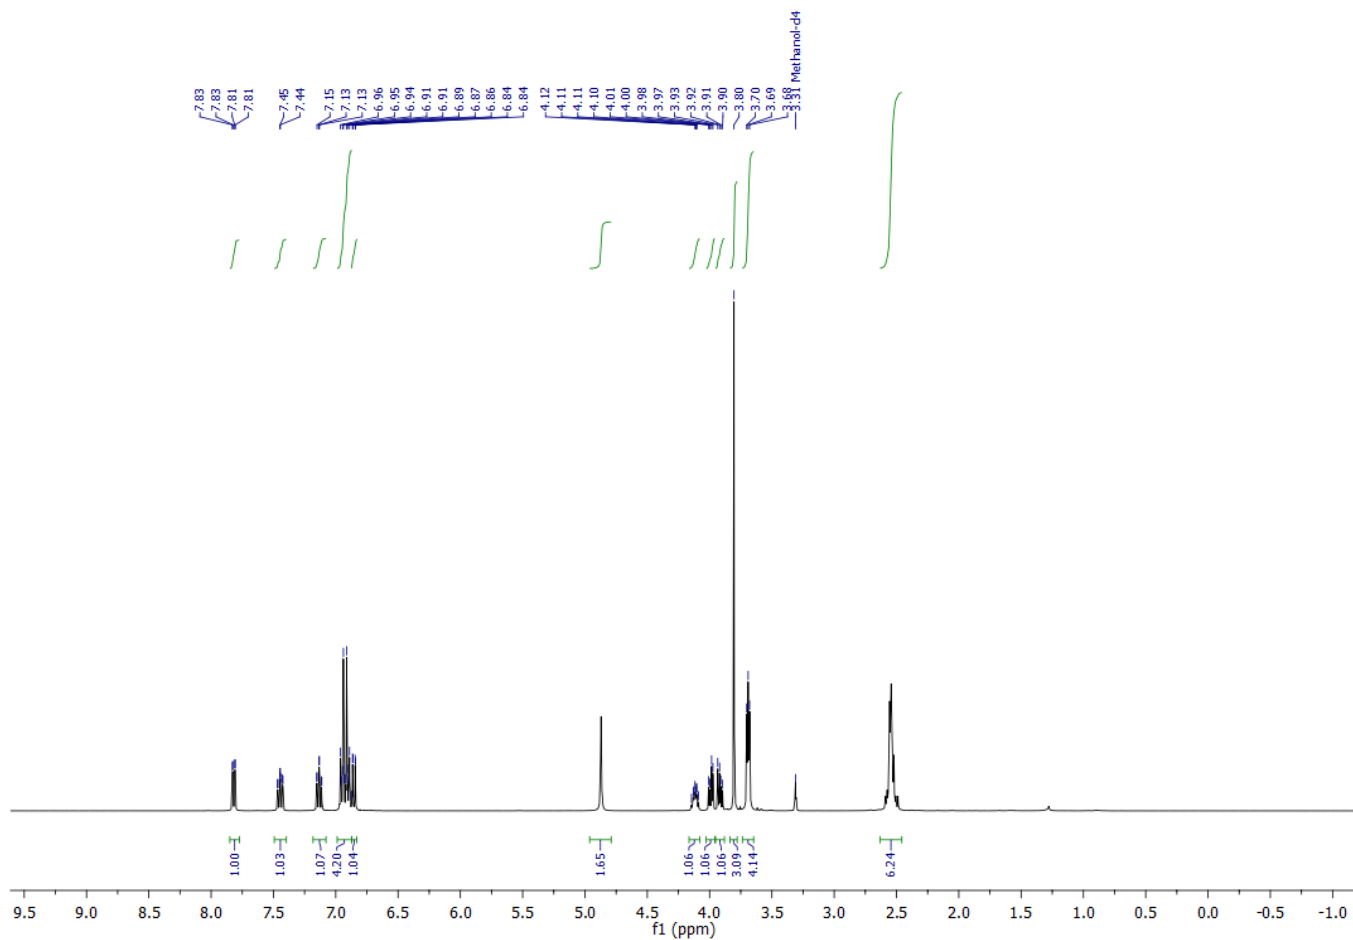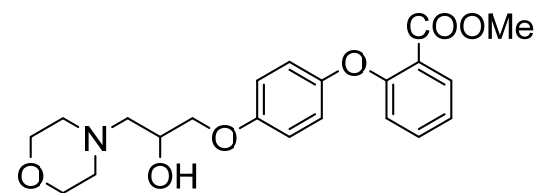

$^{13}\text{C}$  NMR (101 MHz, MeOD)  $\delta$  168.01, 158.65, 156.71, 151.89, 134.71, 132.55, 123.76, 123.47, 121.21, 120.07, 116.78, 72.42, 68.11, 67.78, 62.57, 55.35, 52.62; HRMS (ESI<sup>+</sup>) for  $\text{C}_{21}\text{H}_{26}\text{NO}_6$  ([M+H]<sup>+</sup>) calculated 388.1755 found 388.1745.

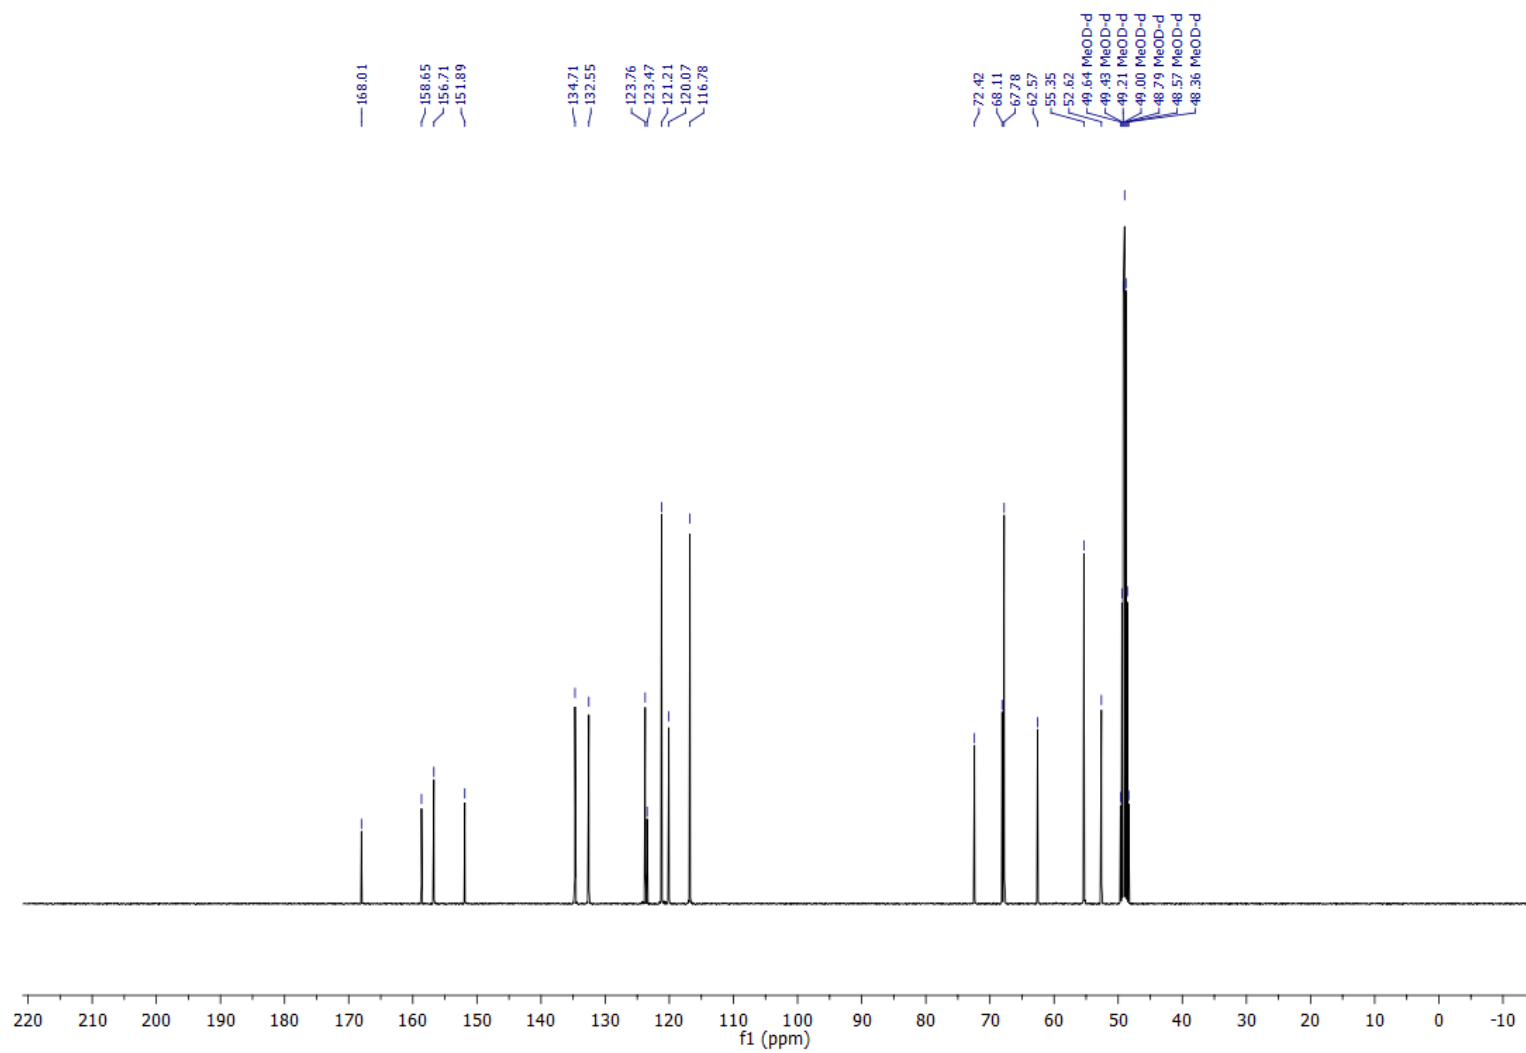

**1-Morpholino-3-(4-(2-nitro-4-(trifluoromethyl)phenoxy)phenoxy)propan-2-ol (5b)**

$^1\text{H}$  NMR (400 MHz,  $\text{CDCl}_3$ )  $\delta$  8.21 (d,  $J = 1.9$  Hz, 1H), 7.71 – 7.64 (m, 1H), 7.09 – 7.03 (m, 2H), 6.99 (dt,  $J_1 = 5.7$  Hz,  $J_2 = 3.3$  Hz, 3H), 4.18 (dq,  $J_1 = 9.2$  Hz,  $J_2 = 4.7$  Hz, 1H), 4.05 – 3.95 (m, 2H), 3.85 – 3.70 (m, 5H), 2.81 – 2.71 (m, 2H), 2.70 – 2.60 (m, 2H), 2.60 – 2.52 (m, 2H).

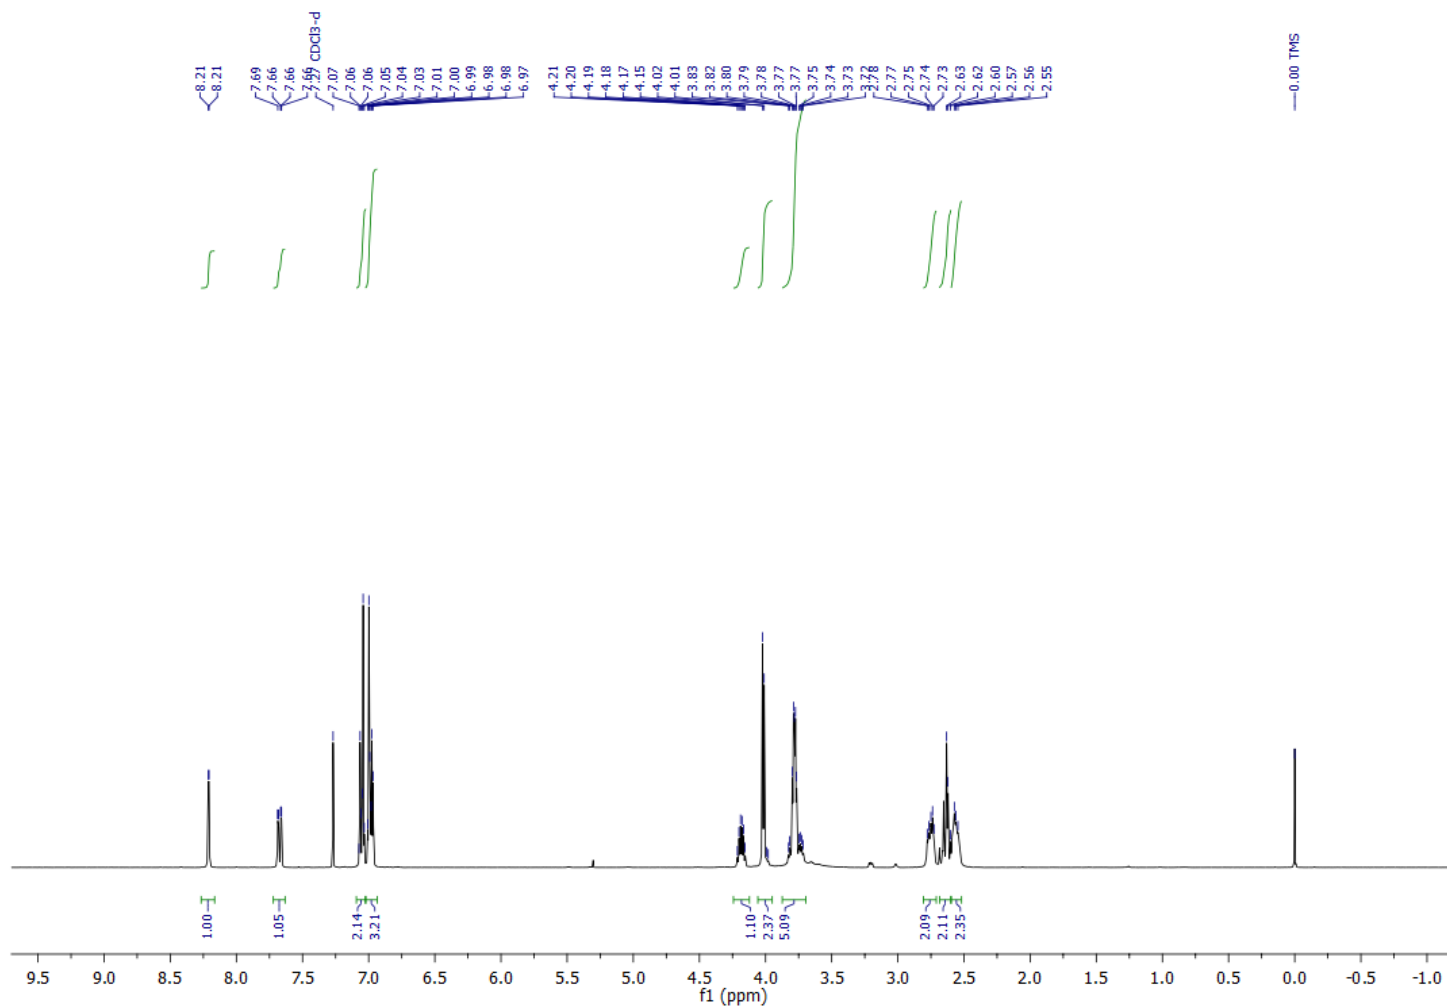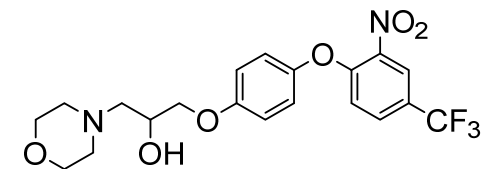



$^{13}\text{C}$  NMR (101 MHz,  $\text{CDCl}_3$ )  $\delta$  156.71, 154.78, 147.72, 139.90, 130.86 (q,  $J = 3.4$  Hz), 124.52 (q,  $J = 34.5$  Hz), 123.64 (q,  $J = 3.9$  Hz), 123.01 (q,  $J = 271.0$  Hz), 121.80, 118.60, 116.27, 70.77, 66.86, 65.34, 61.18, 53.87. HRMS (ESI $^+$ ) for  $\text{C}_{20}\text{H}_{22}\text{F}_3\text{N}_2\text{O}_6$  ( $[\text{M}+\text{H}]^+$ ) calculated 443.1425 found 443.1415.

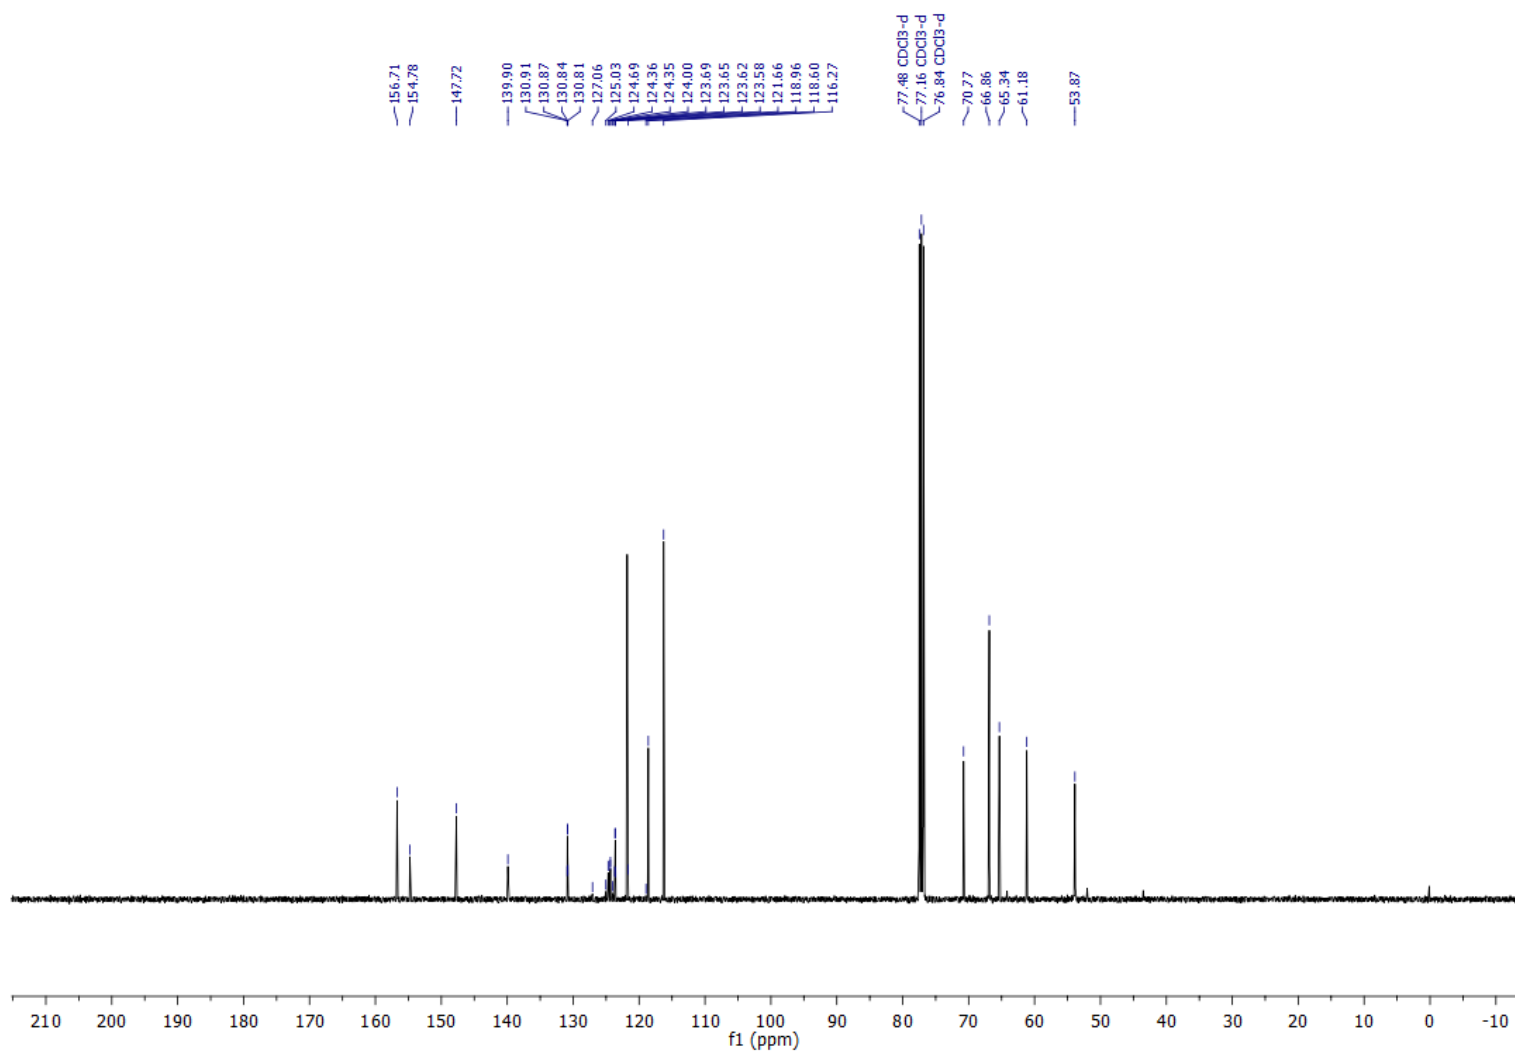

***N*-(4-(2-hydroxy-3-morpholinopropoxy)phenyl)-2-nitro-4-(trifluoromethyl)benzamide (5c)**

$^1\text{H}$  NMR (400 MHz, DMSO)  $\delta$  10.63 (s, 1H), 8.50 (d,  $J = 1.0$  Hz, 1H), 8.28 (dd,  $J_1 = 8.0$  Hz,  $J_2 = 1.1$  Hz, 1H), 8.02 (d,  $J = 7.9$  Hz, 1H), 7.59 – 7.49 (m, 2H), 7.00 – 6.91 (m, 2H), 4.87 (d,  $J = 4.5$  Hz, 1H), 4.00 – 3.92 (m, 2H), 3.86 (dd,  $J_1 = 11.0$  Hz,  $J_2 = 7.3$  Hz, 1H), 3.57 (t,  $J = 4.6$  Hz, 4H), 2.48 – 2.30 (m, 6H)

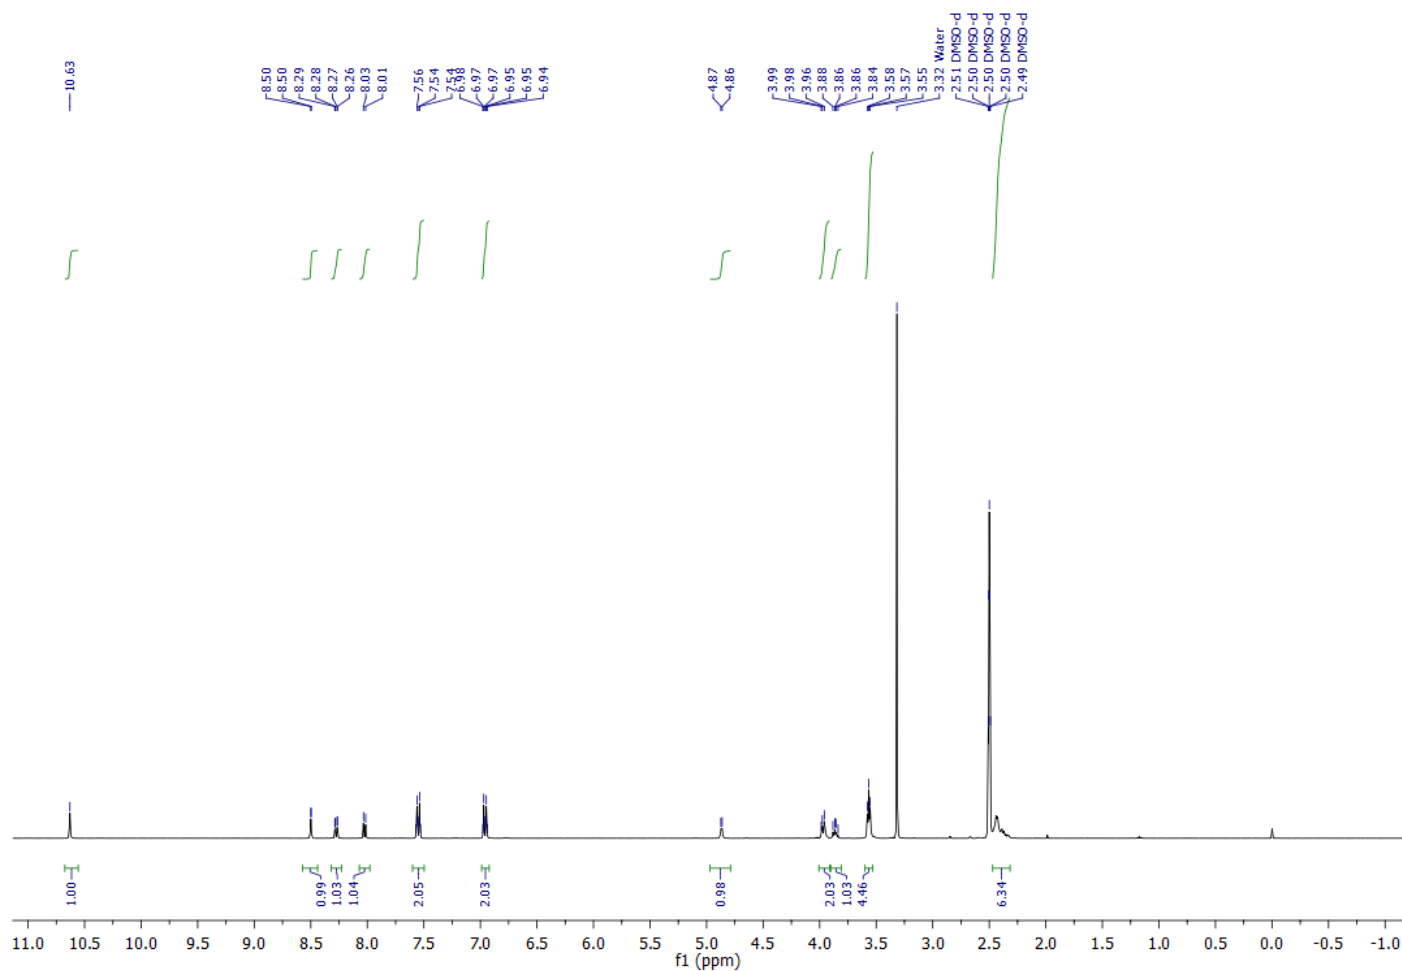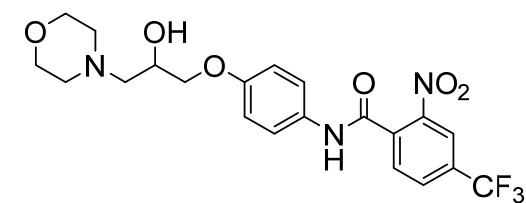

$^{13}\text{C}$  NMR (101 MHz, MeOD)  $\delta$  165.61, 157.71, 147.99, 137.53, 133.66 (q,  $J = 34.2$  Hz), 132.56, 131.82 (q,  $J = 3.4$  Hz), 131.62, 124.20 (q,  $J = 271.0$  Hz), 123.34, 122.88 (q,  $J = 3.8$  Hz), 115.91, 72.19, 68.17, 67.84, 62.60, 55.40. HRMS (ESI $^{+}$ ) for  $\text{C}_{21}\text{H}_{23}\text{F}_3\text{N}_3\text{O}_6$  ( $[\text{M}+\text{H}]^{+}$ ) calculated 470.1534 found 470.1523

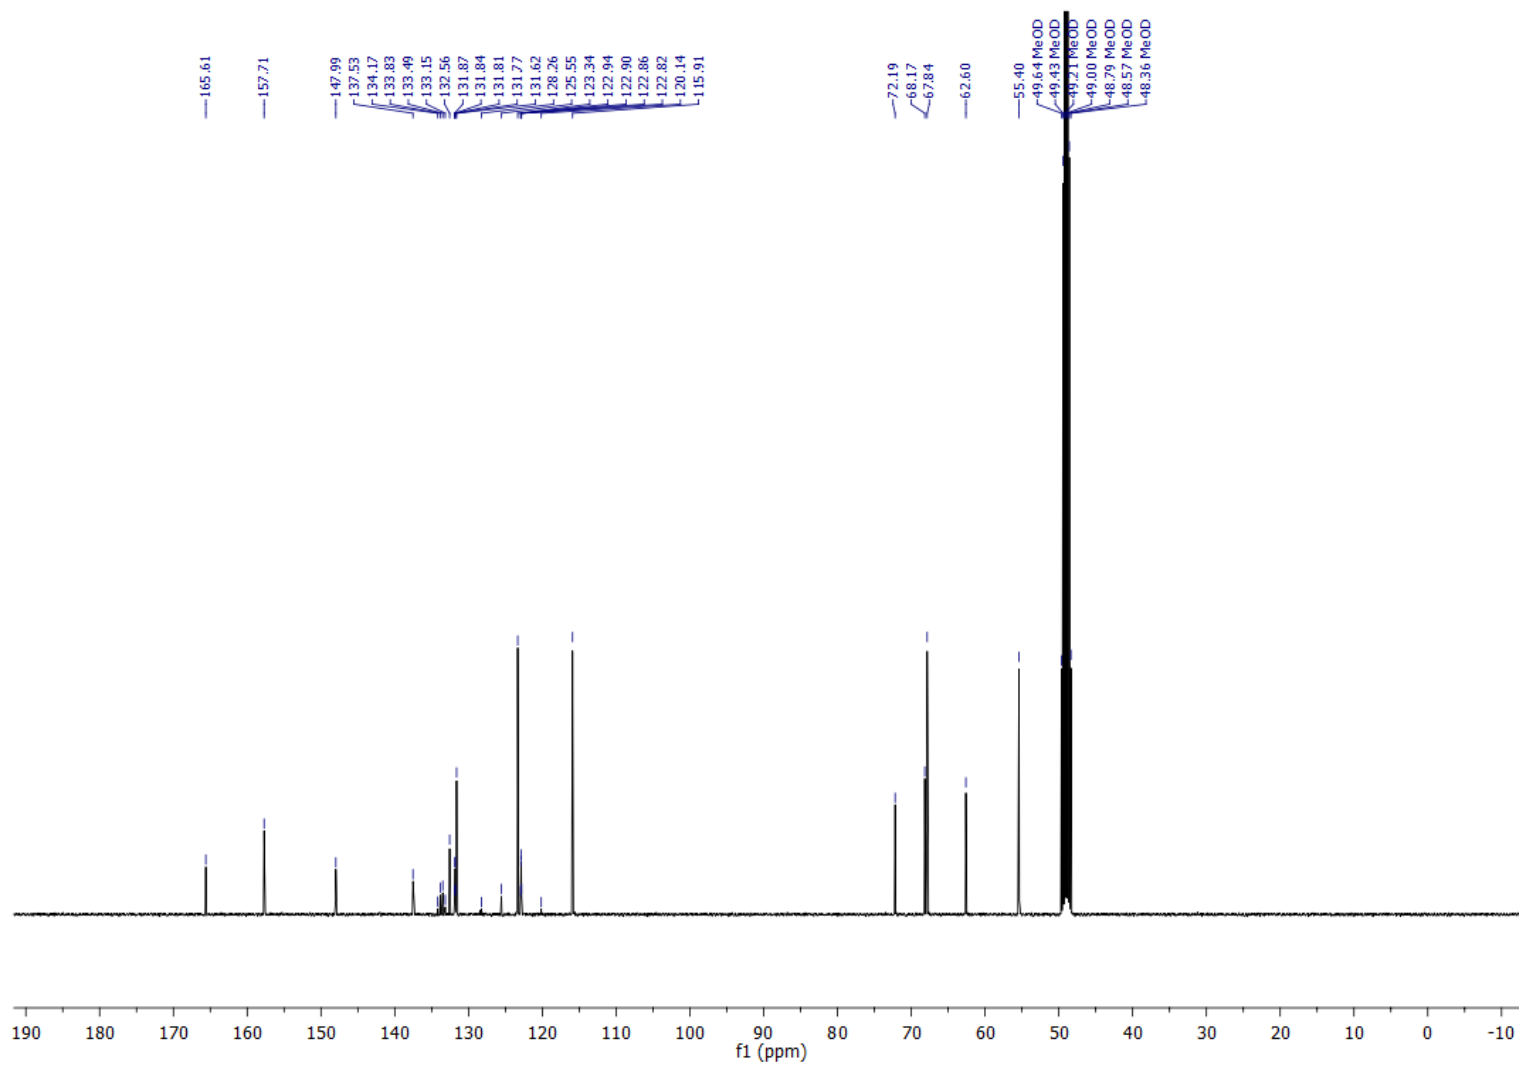

**Methyl 2-((4-(2-hydroxy-3-morpholinopropoxy)phenyl)amino)benzoate (5d)**

$^1\text{H}$  NMR (400 MHz, DMSO)  $\delta$  9.15 (s, 1H), 7.86 (dd,  $J_1 = 8.0$  Hz,  $J_2 = 1.6$  Hz, 1H), 7.34 (ddd,  $J_1 = 8.6$  Hz,  $J_2 = 7.2$  Hz,  $J_3 = 1.6$  Hz, 1H), 7.21 – 7.13 (m, 2H), 7.00 – 6.95 (m, 2H), 6.93 (dd,  $J_1 = 8.6$  Hz,  $J_2 = 0.7$  Hz, 1H), 6.71 (ddd,  $J_1 = 8.1$  Hz,  $J_2 = 7.1$  Hz,  $J_3 = 1.1$  Hz, 1H), 4.87 (d,  $J = 4.7$  Hz, 1H), 4.01 – 3.92 (m, 2H), 3.87 (dd,  $J_1 = 10.0$  Hz,  $J_2 = 6.4$  Hz, 1H), 3.85 (s, 3H), 3.56 (t,  $J = 4.6$  Hz, 4H), 2.48 – 2.31 (m, 6H)

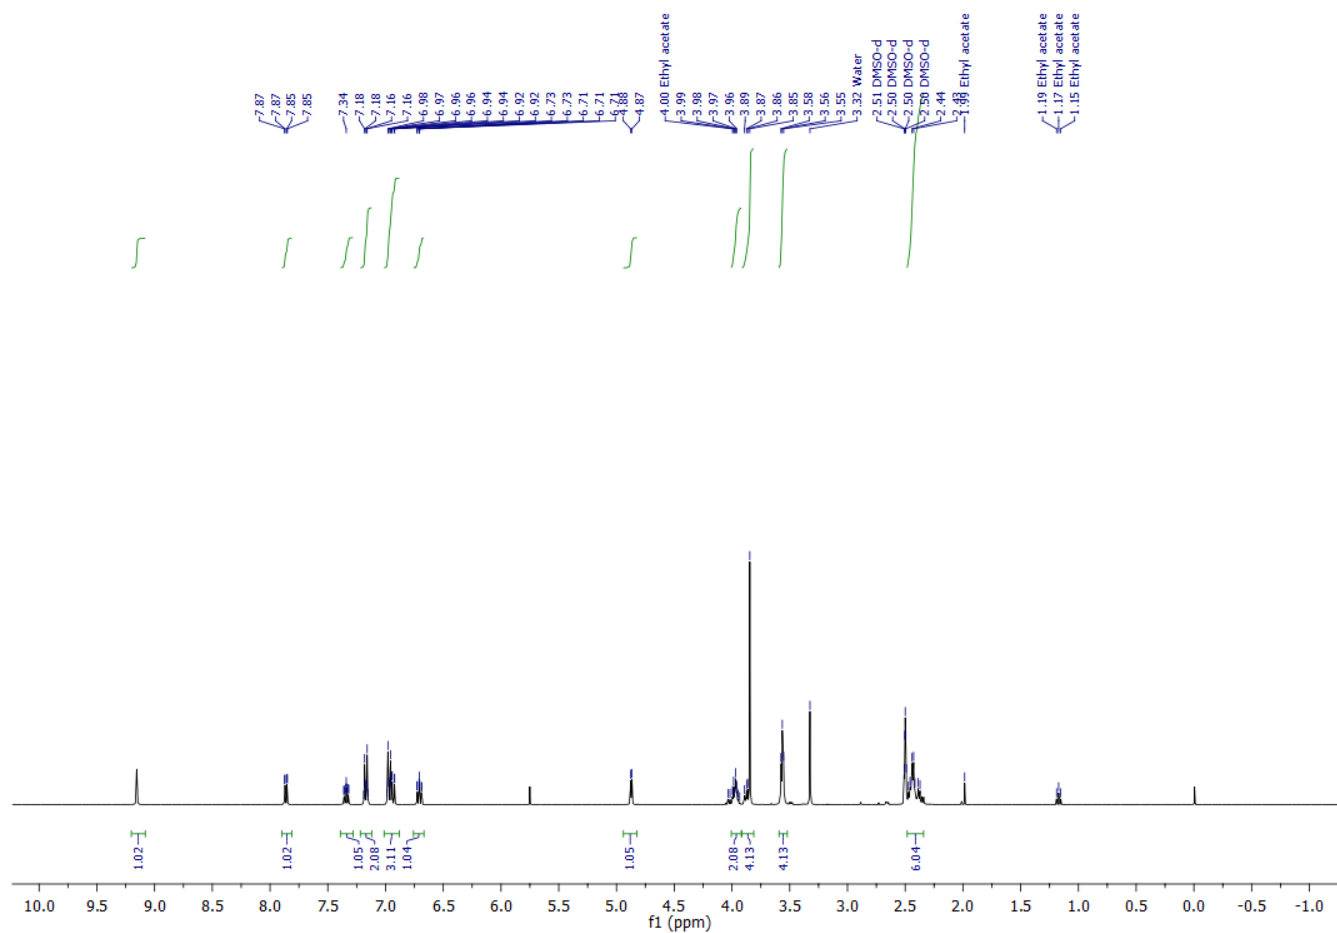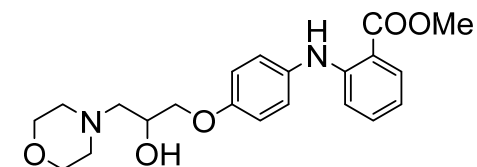

$^{13}\text{C}$  NMR (101 MHz, MeOD)  $\delta$  170.24, 157.48, 150.64, 135.28, 134.88, 132.56, 126.63, 117.38, 116.53, 114.31, 112.04, 72.22, 68.14, 67.81, 62.61, 55.38, 52.16; HRMS (ESI $^{+}$ ) for  $\text{C}_{21}\text{H}_{27}\text{N}_2\text{O}_5$  ( $[\text{M}+\text{H}]^{+}$ ) calculated 387.1915 found 387.1905

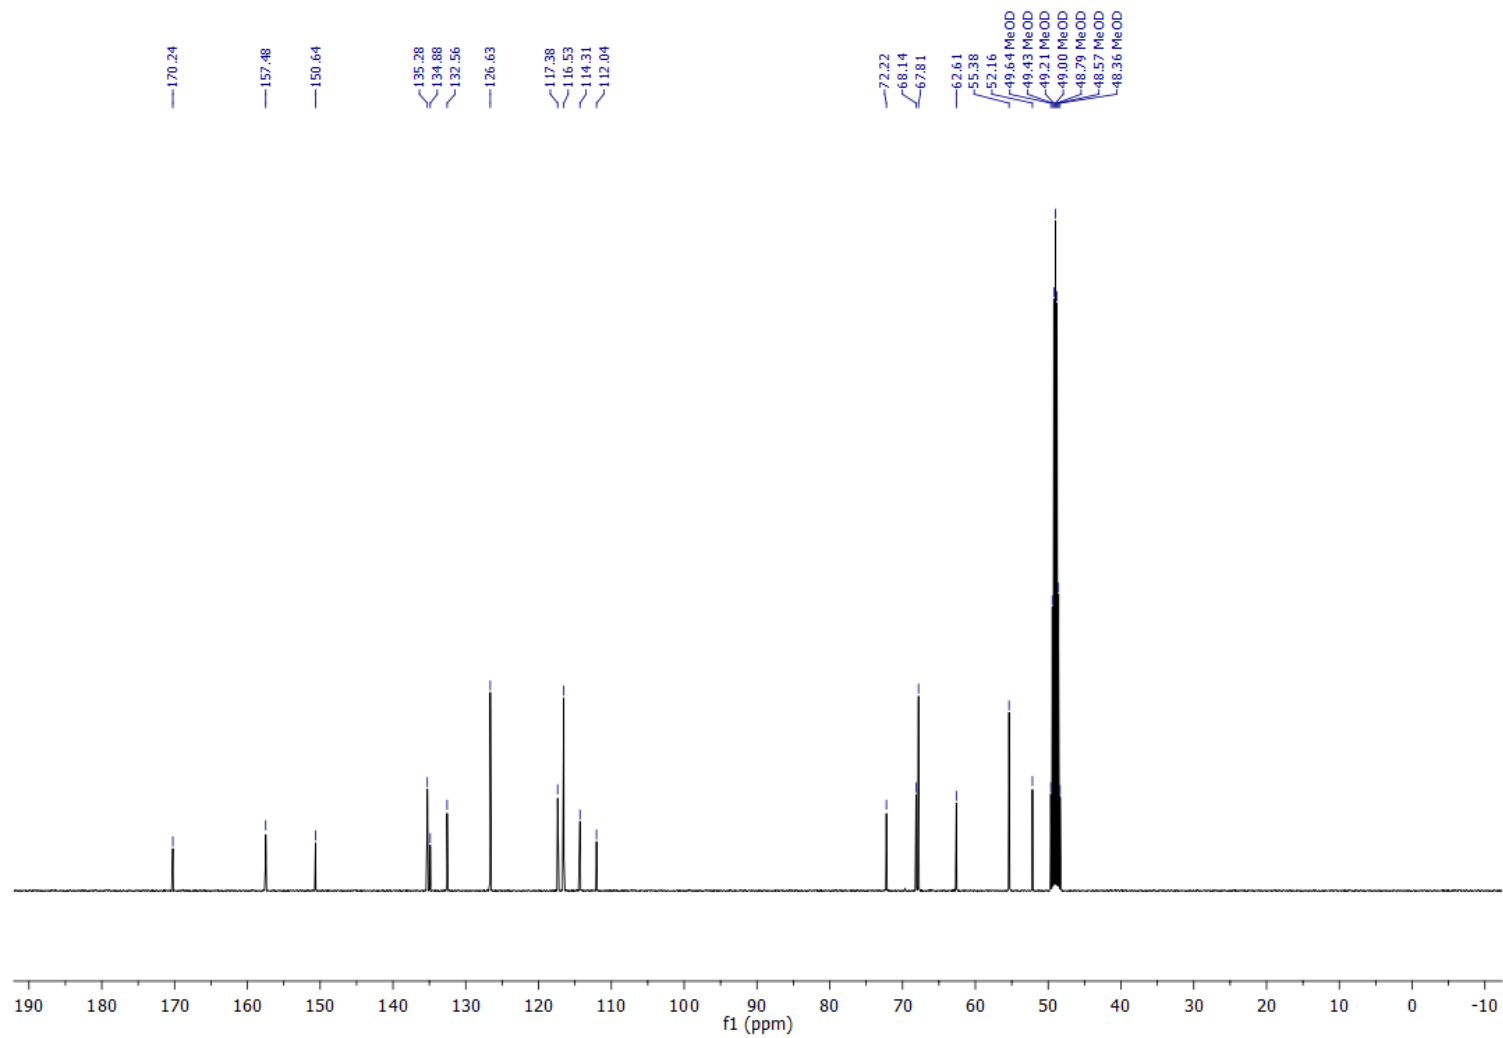

**Methyl 2-((4-(2-hydroxy-3-morpholinopropoxy)phenyl)amino)benzoate (5e)**

$^1\text{H}$  NMR (400 MHz,  $\text{CDCl}_3$ )  $\delta$  9.57 (s, 1H), 8.21 (d,  $J = 1.4$  Hz, 1H), 7.43 (dd,  $J_1 = 9.0$  Hz,  $J_2 = 2.2$  Hz, 1H), 7.21 – 7.12 (m, 2H), 7.02 – 6.89 (m, 3H), 4.13 (tt,  $J_1 = 9.5$  Hz,  $J_2 = 4.9$  Hz, 1H), 4.05 – 3.97 (m, 2H), 3.93 (s, 3H), 3.81 – 3.66 (m, 4H), 2.76 – 2.64 (m, 2H), 2.64 – 2.53 (m, 2H), 2.54 – 2.43 (m, 2H)

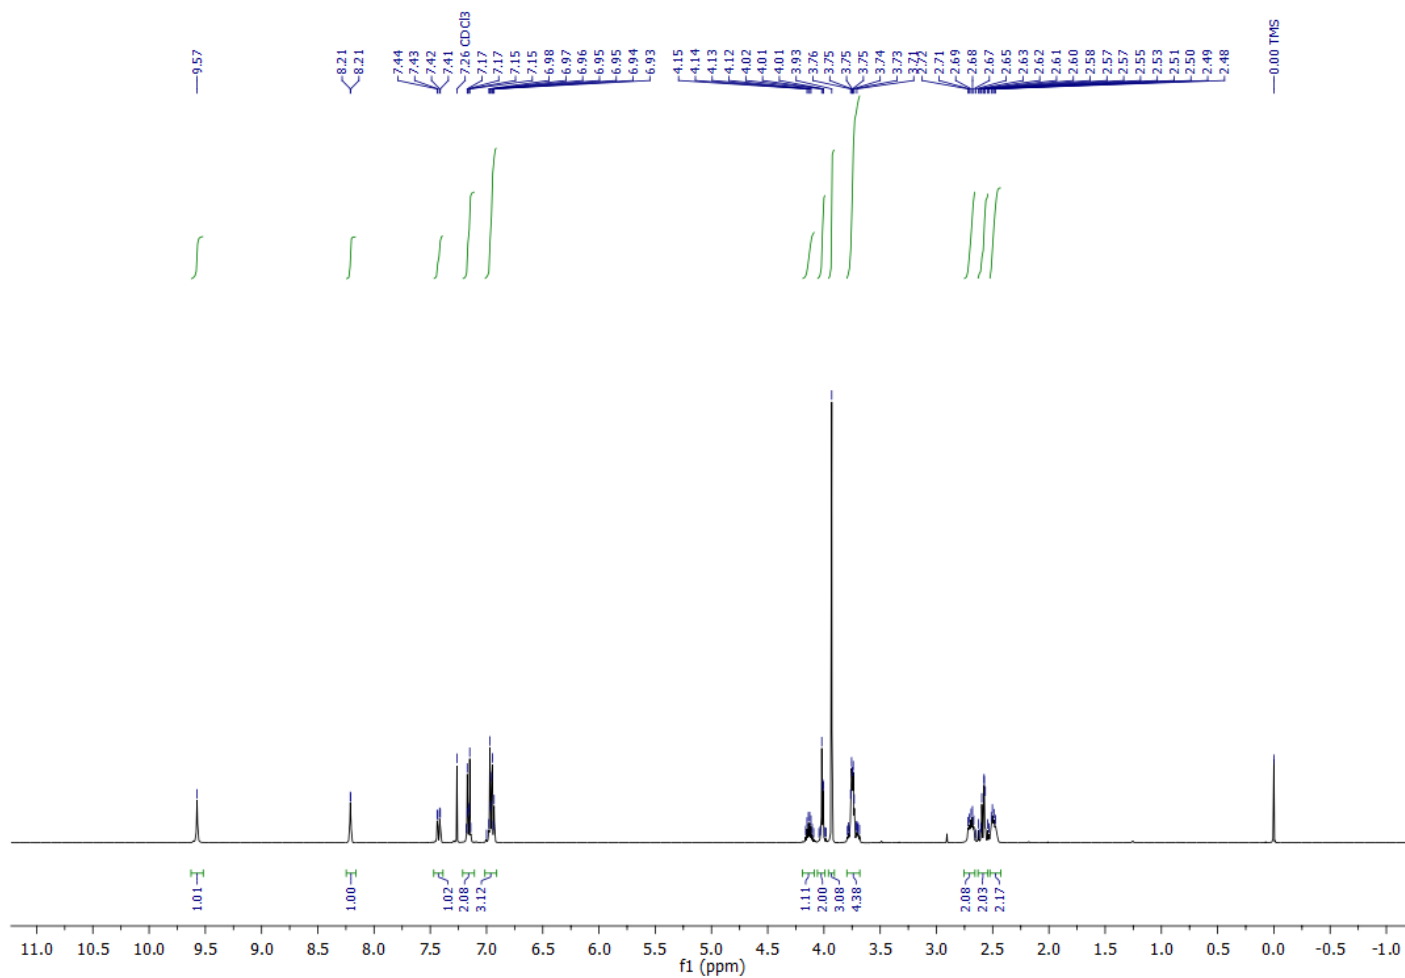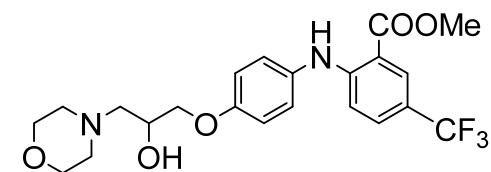

$^{13}\text{C}$  NMR (101 MHz,  $\text{CDCl}_3$ )  $\delta$  168.38, 156.75, 151.92, 132.51, 130.71 (q,  $J = 3.3$  Hz), 129.46 (q,  $J = 3.9$  Hz), 124.50 (q,  $J = 270.6$  Hz), 126.74, 117.98 (q,  $J = 33.2$  Hz), 115.69, 113.42, 109.99, 70.64, 67.15, 65.52, 61.14, 53.90, 52.16; HRMS (ESI $^+$ ) for  $\text{C}_{22}\text{H}_{26}\text{F}_3\text{N}_2\text{O}_5$  ( $[\text{M}+\text{H}]^+$ ) calculated 455.1788 found 455.1777

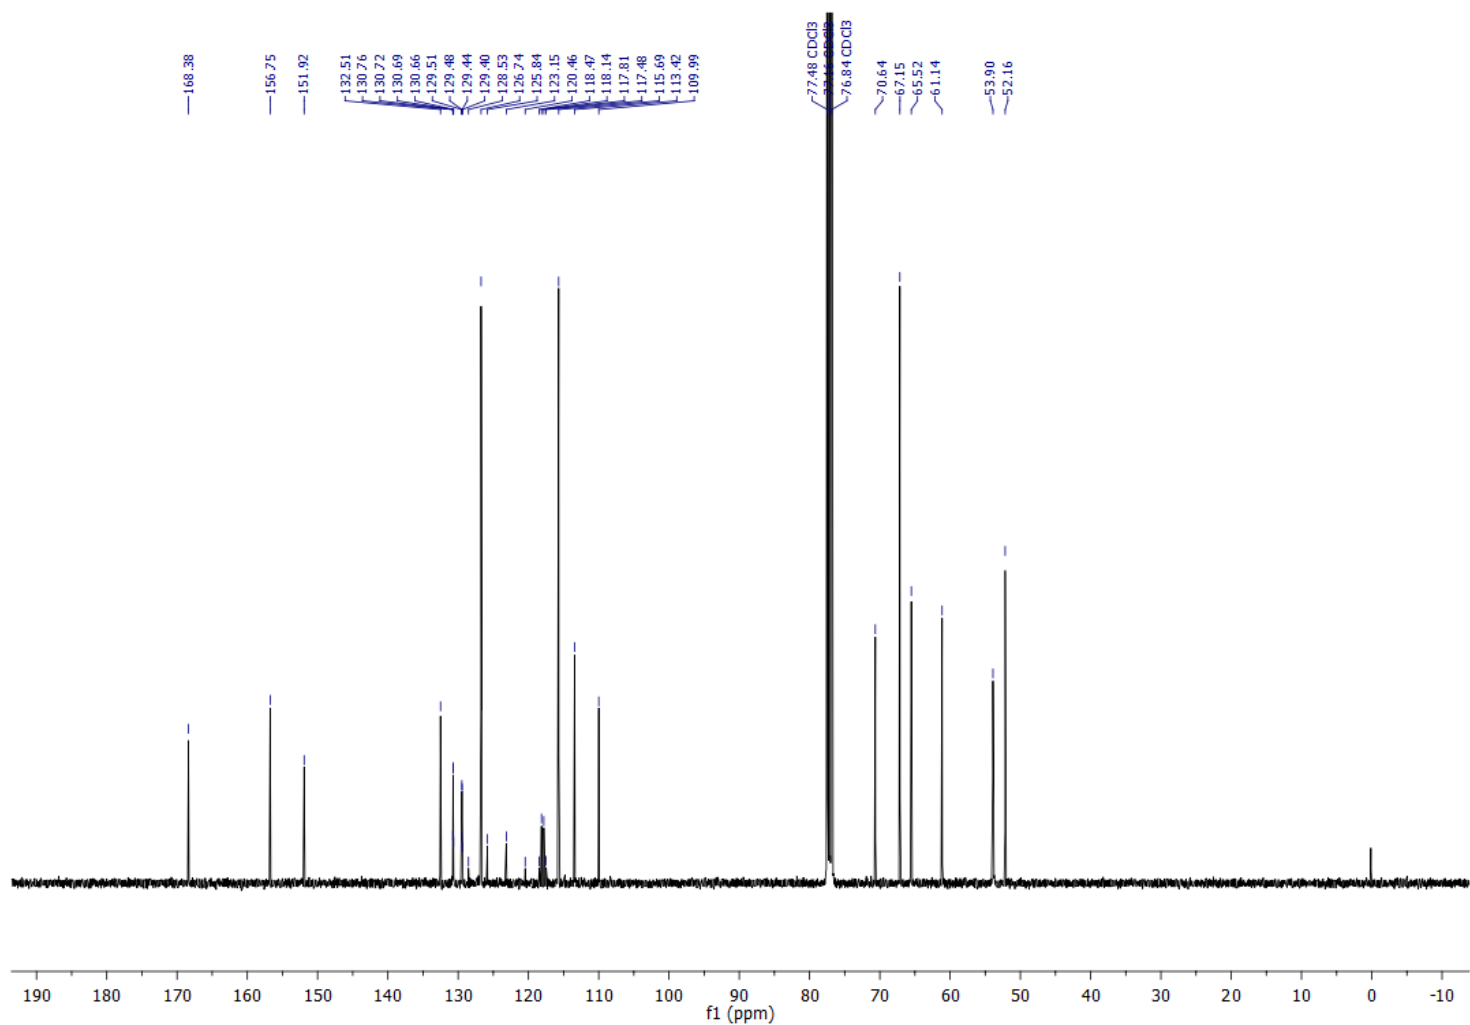

**1-(4-((2,4-Dinitrophenyl)amino)phenoxy)-3-morpholinopropan-2-ol (5f)**

$^1\text{H}$  NMR (400 MHz,  $\text{CDCl}_3$ )  $\delta$  9.87 (s, 1H), 9.17 (d,  $J = 2.6$  Hz, 1H), 8.21 – 8.07 (m, 1H), 7.25 – 7.19 (m, 2H), 7.09 – 6.94 (m, 3H), 4.16 (td,  $J_1 = 9.4$  Hz,  $J_2 = 4.5$  Hz, 1H), 4.09 – 3.98 (m, 2H), 3.85 – 3.68 (m, 4H), 2.79 – 2.44 (m, 6H)

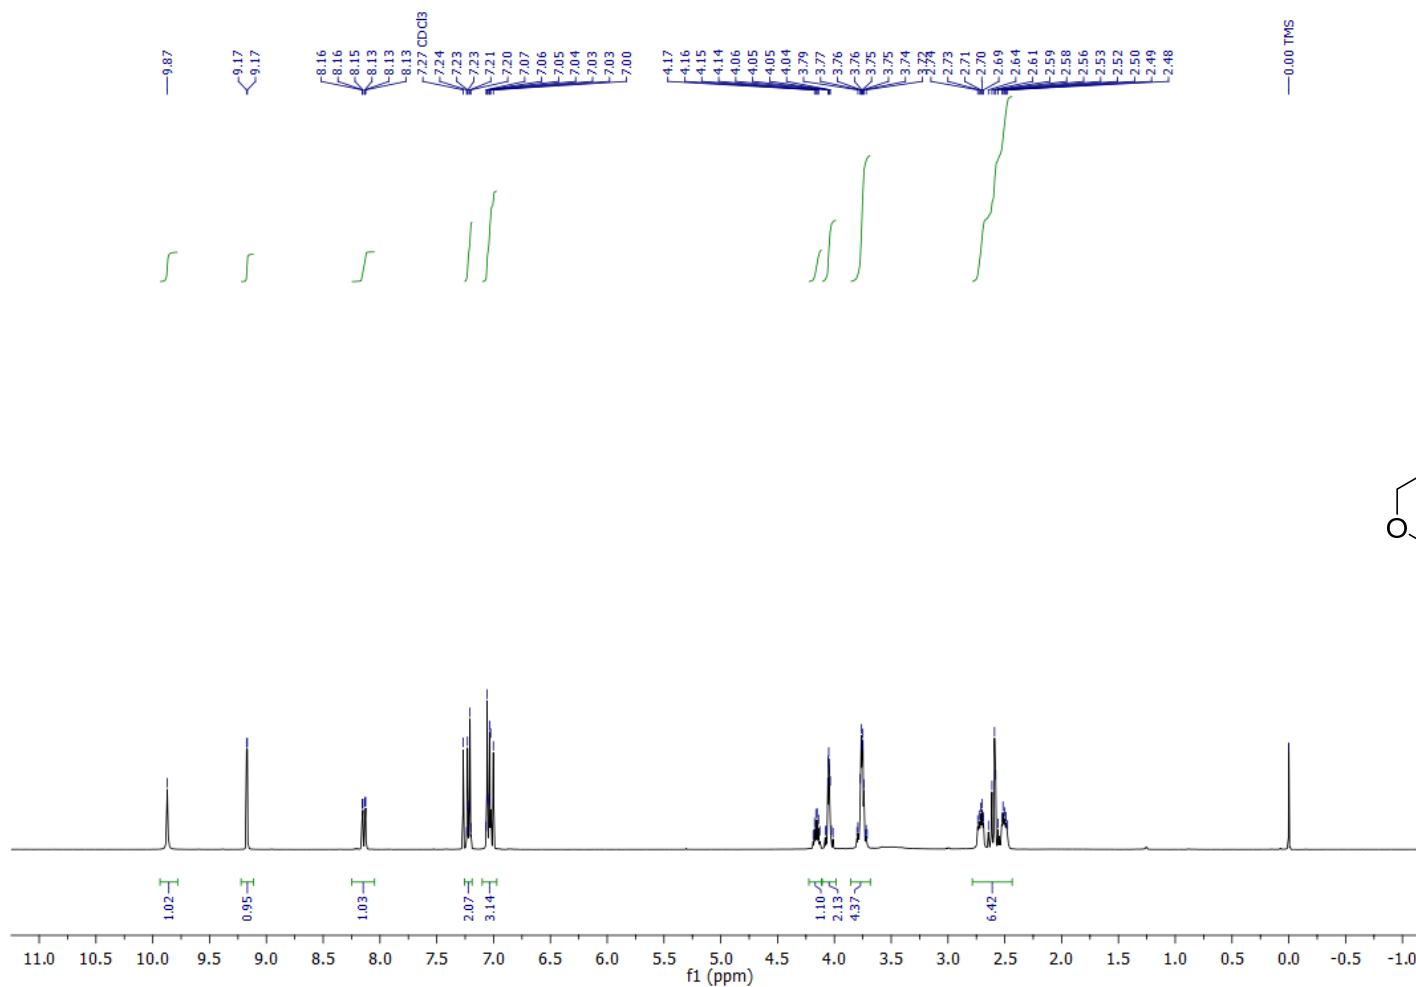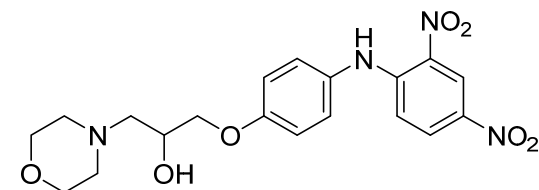



$^{13}\text{C}$  NMR (101 MHz,  $\text{CDCl}_3$ )  $\delta$  158.35, 148.03, 137.24, 130.88, 130.01, 129.64, 127.59, 124.25, 116.19, 116.09, 70.69, 67.10, 65.39, 61.03, 53.86; HRMS (ESI $^+$ ) for  $\text{C}_{19}\text{H}_{23}\text{N}_4\text{O}_7$  ( $[\text{M}+\text{H}]^+$ ) calculated 419.1561 found 419.1550

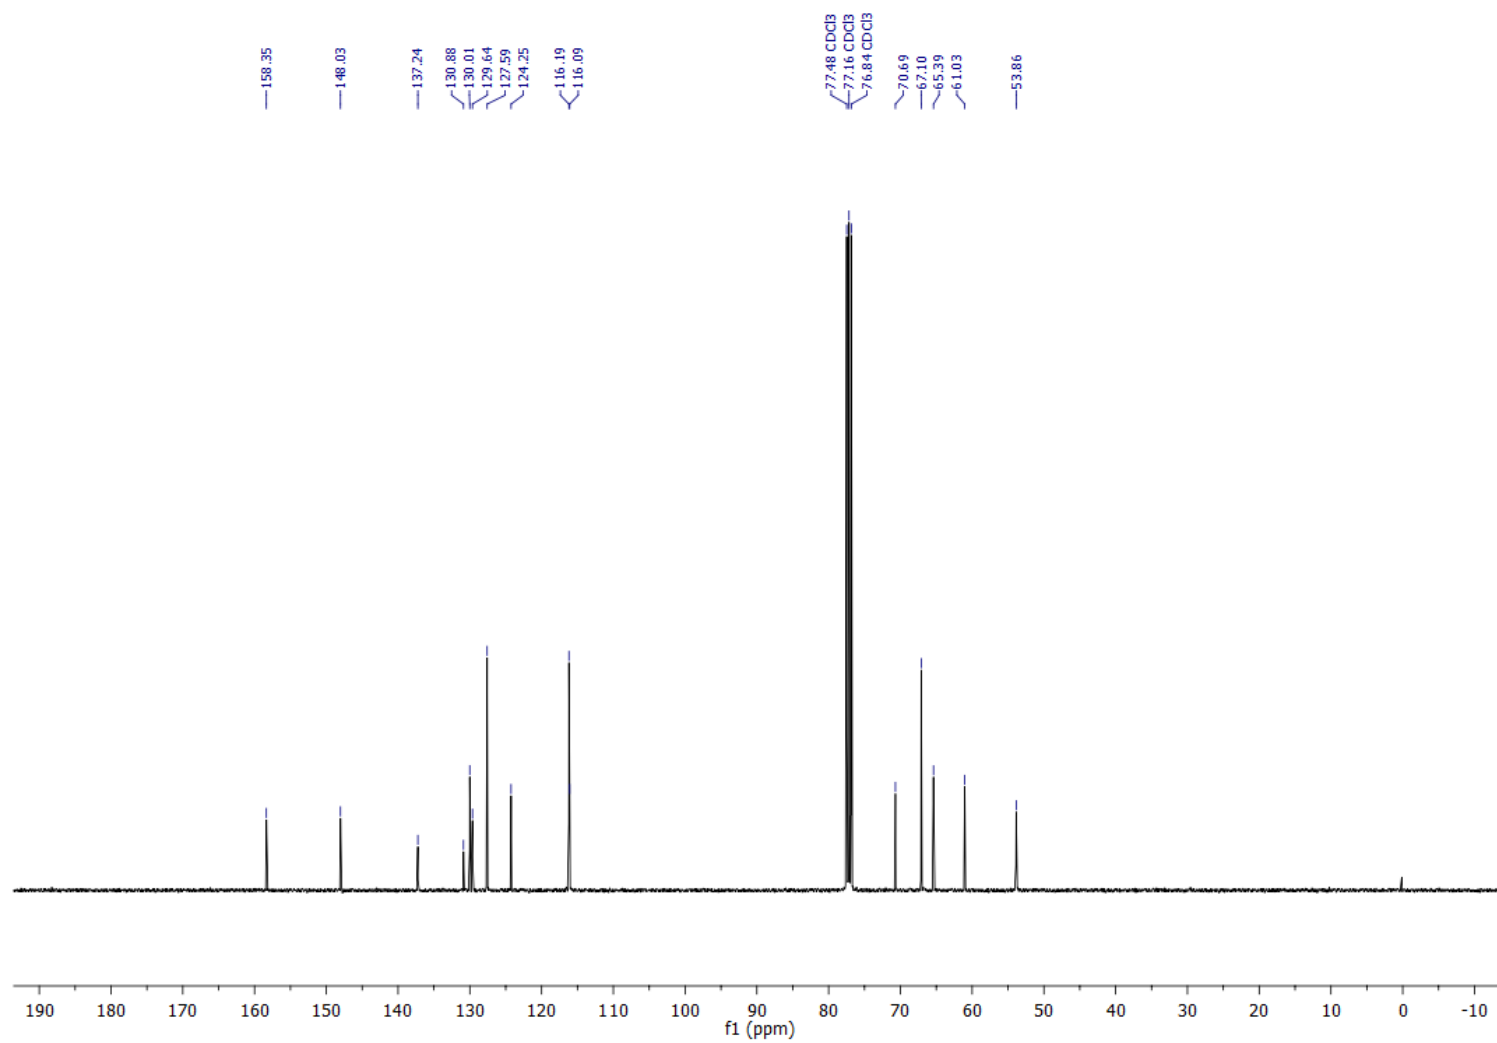

**2-((4-(2-Nitro-4-(trifluoromethyl)phenoxy)phenoxy)methyl)oxirane (6a)**

$^1\text{H}$  NMR (400 MHz,  $\text{CDCl}_3$ )  $\delta$  8.19 (d,  $J = 1.8$  Hz, 1H), 7.68 (dd,  $J_1 = 8.9$  Hz,  $J_2 = 2.0$  Hz, 1H), 7.09 – 6.93 (m, 5H), 4.36 (brs, 1H), 4.22 – 4.13 (m, 1H), 4.01 (d,  $J = 4.9$  Hz, 2H), 2.77 – 2.67 (m, 1H), 2.55 (dd,  $J_1 = 12.4$  Hz,  $J_2 = 2.7$  Hz, 1H), 2.45 (s, 6H)

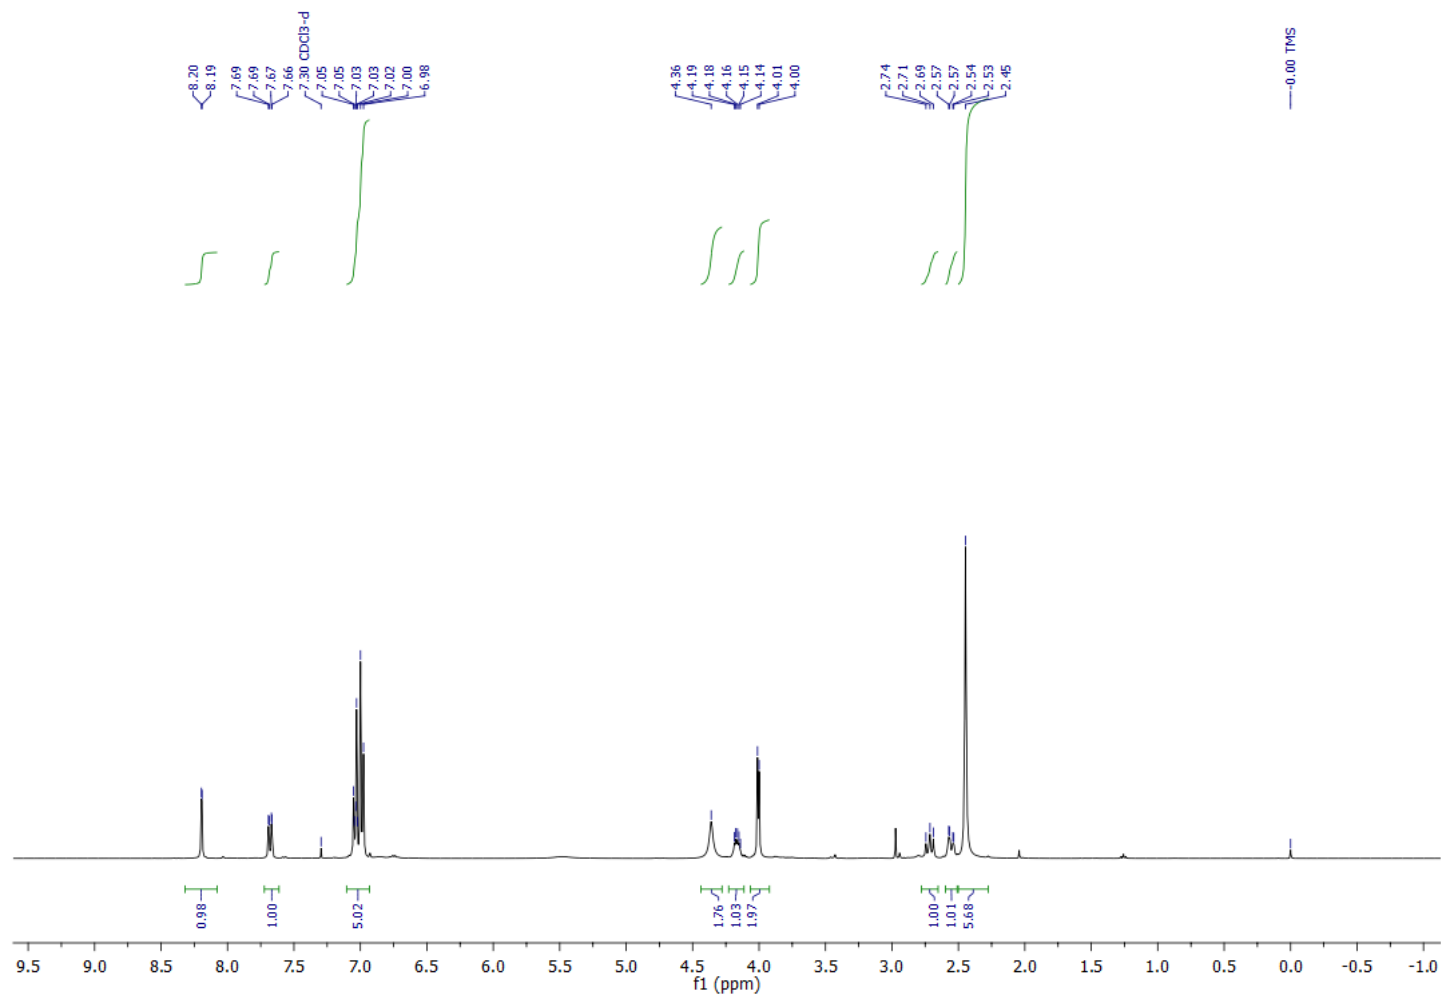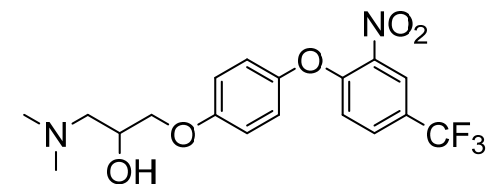

$^{13}\text{C}$  NMR (101 MHz,  $\text{CDCl}_3$ )  $\delta$  156.43, 154.67, 147.80, 139.85, 130.95 (q,  $J = 3.7$  Hz), 124.55 (q,  $J = 34.5$  Hz), 123.60 (q,  $J = 3.8$  Hz), 123.02 (q,  $J = 271.0$  Hz), 121.75, 118.73, 116.30, 70.54, 65.41, 61.62, 45.07; HRMS (ESI $^+$ ) for  $\text{C}_{18}\text{H}_{20}\text{F}_3\text{N}_2\text{O}_5$  ( $[\text{M}+\text{H}]^+$ ) calculated 401.1319 found 401.1310

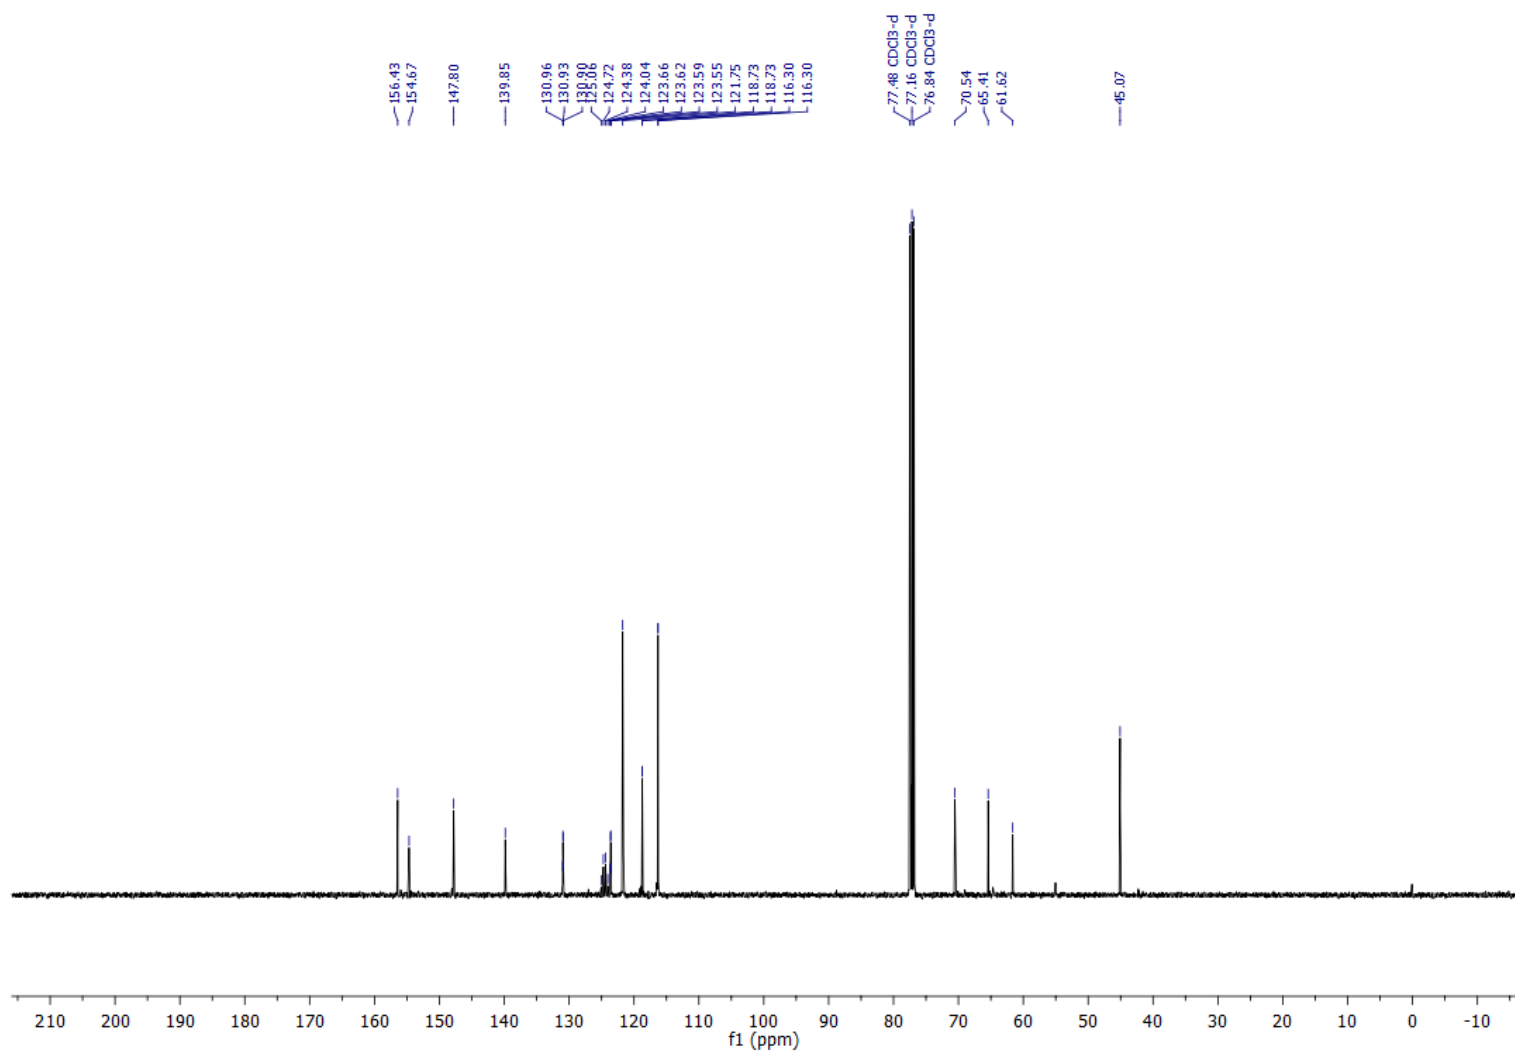

***N*-(4-(3-(dimethylamino)-2-hydroxypropoxy)phenyl)-2-nitro-4-(trifluoromethyl)benzamide (6b)**

$^1\text{H}$  NMR (400 MHz, DMSO)  $\delta$  10.77 (s, 1H), 9.82 (s, 1H), 8.50 (d,  $J = 0.9$  Hz, 1H), 8.28 (dd,  $J_1 = 8.0$  Hz,  $J_2 = 1.1$  Hz, 1H), 8.03 (d,  $J = 7.9$  Hz, 1H), 7.64 – 7.53 (m, 2H), 7.04 – 6.91 (m, 2H), 6.00 (d,  $J = 3.9$  Hz, 1H), 4.29 (d,  $J = 2.5$  Hz, 1H), 4.02 – 3.88 (m, 2H), 3.40 – 3.13 (m, 2H), 2.84 (d,  $J = 11.5$  Hz, 6H)

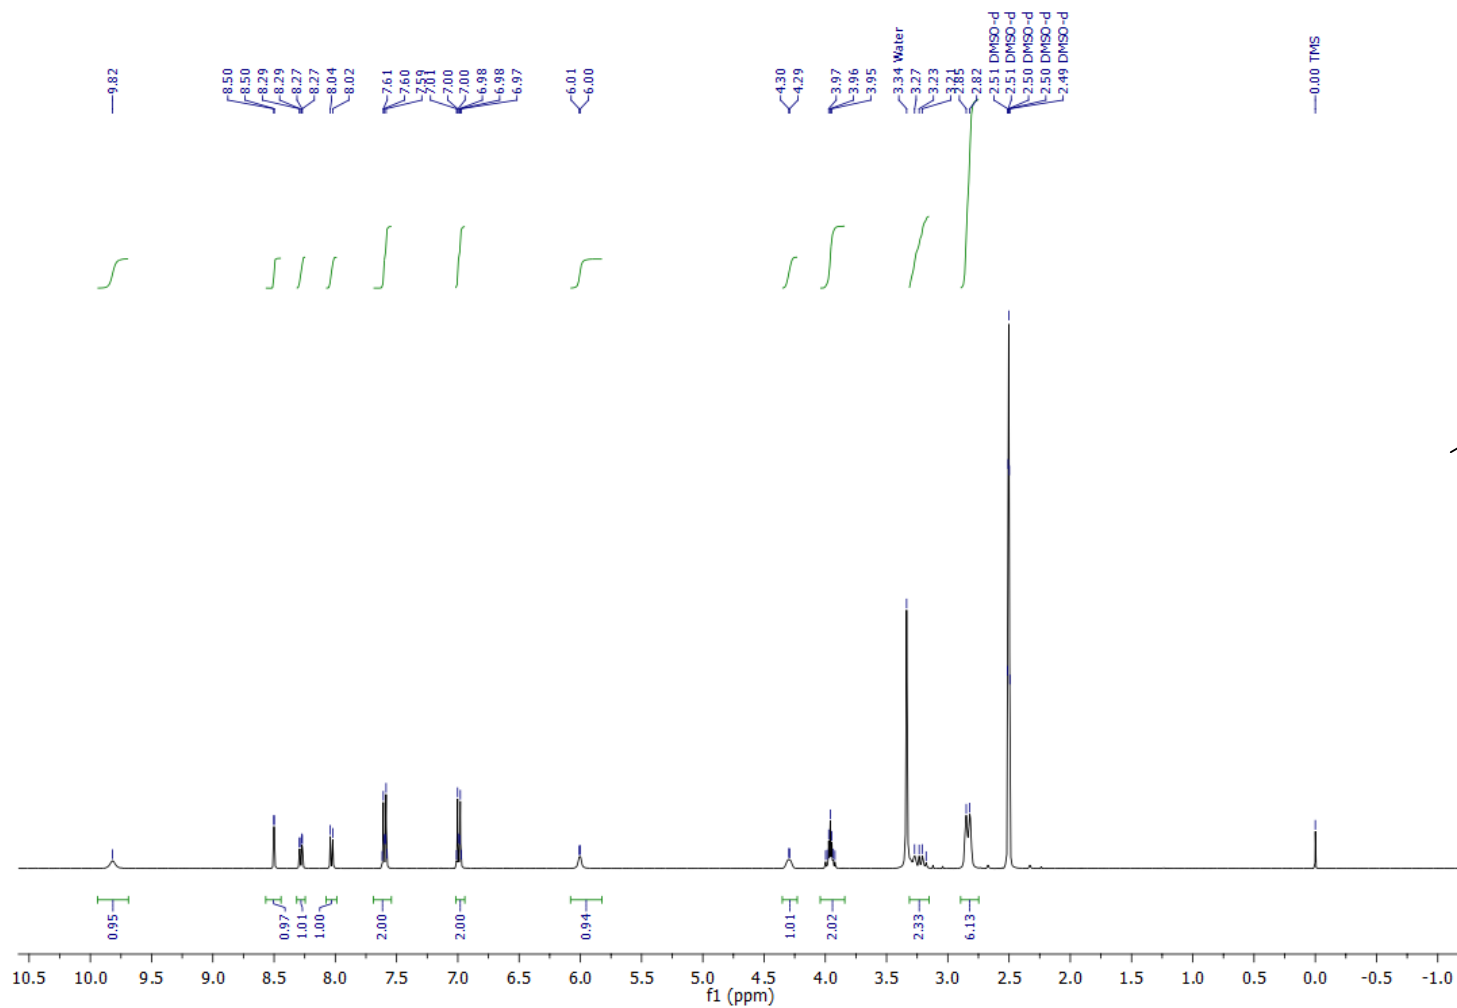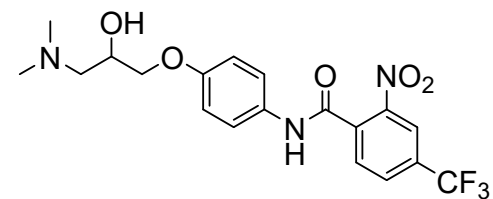

$^{13}\text{C}$  NMR (101 MHz, MeOD)  $\delta$  165.70, 157.18, 148.00, 137.49, 133.73 (q,  $J = 34.2$  Hz), 133.05, 131.86 (q,  $J = 3.5$  Hz), 130.79, 123.76 (q,  $J = 271.0$  Hz), 123.40, 122.90 (q,  $J = 3.3$  Hz), 115.94, 71.30, 65.37, 61.01. HRMS (ESI $^{+}$ ) for  $\text{C}_{19}\text{H}_{21}\text{F}_3\text{N}_3\text{O}_5$  ( $[\text{M}+\text{H}]^{+}$ ) calculated 428.1428 found 428.1420

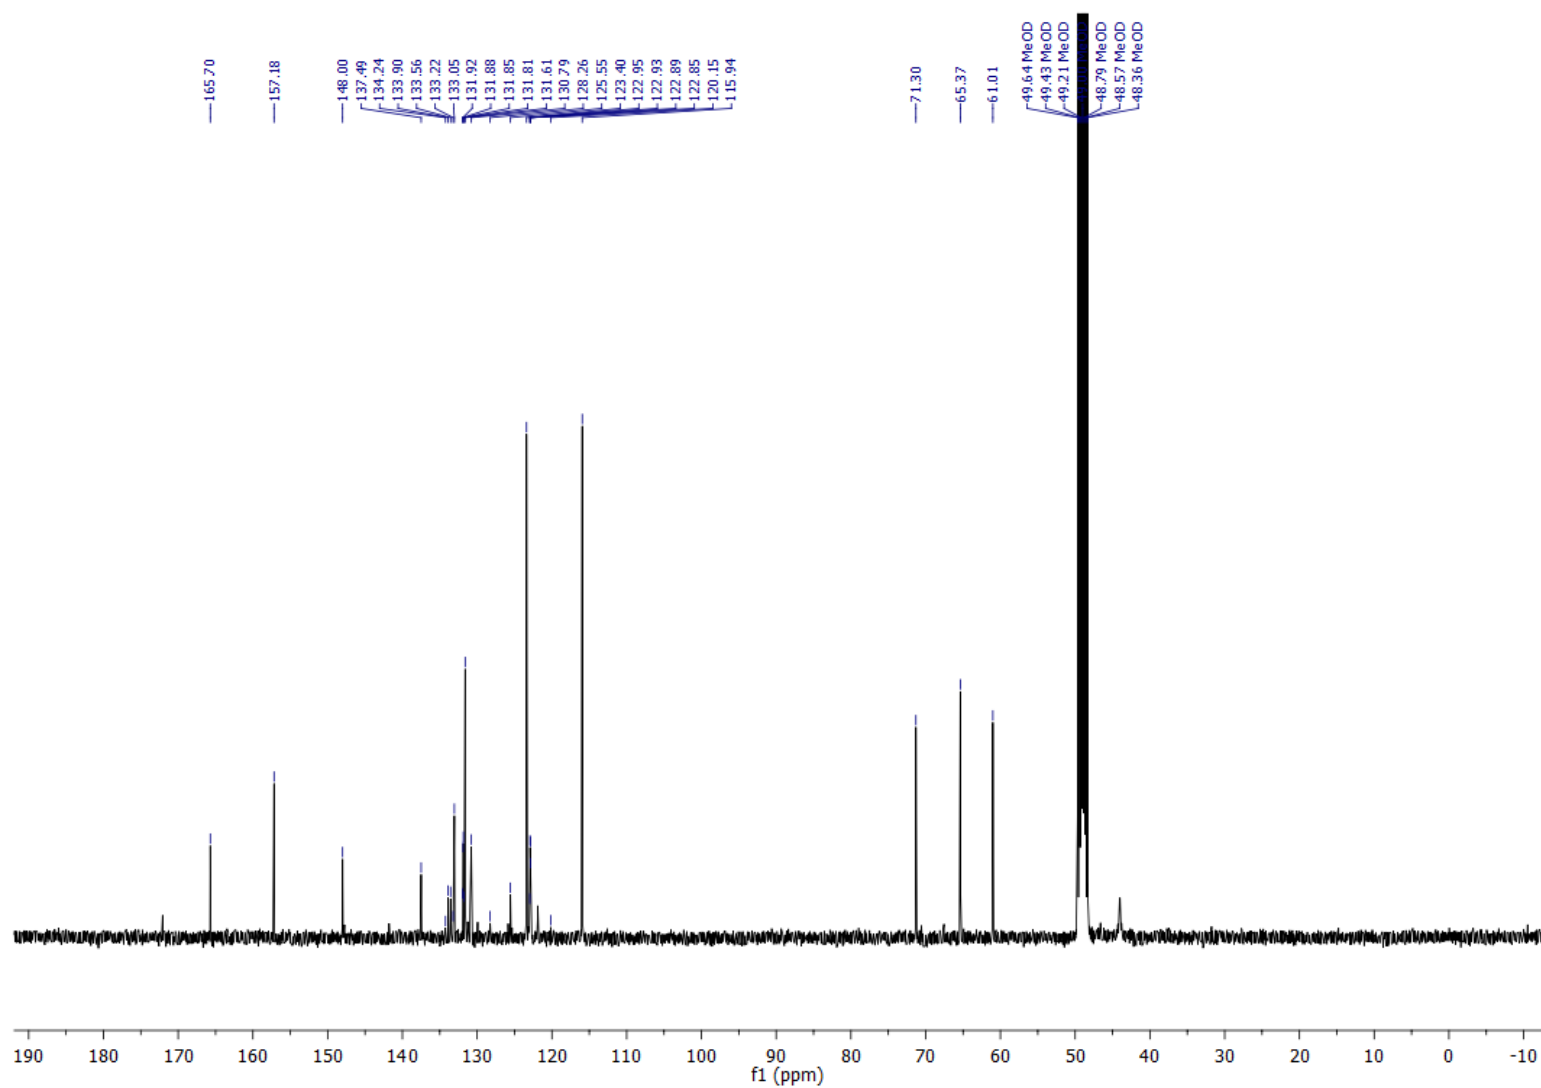

**Methyl 2-((4-(3-(dimethylamino)-2-hydroxypropoxy)phenyl)amino)-5-(trifluoromethyl)benzoate (6c)**

$^1\text{H}$  NMR (400 MHz,  $\text{CDCl}_3$ )  $\delta$  9.56 (s, 1H), 8.21 (d,  $J = 1.4$  Hz, 1H), 7.42 (dd,  $J_1 = 9.0$  Hz,  $J_2 = 2.3$  Hz, 1H), 7.21 – 7.10 (m, 2H), 7.02 – 6.90 (m, 3H), 4.12 – 4.04 (m, 1H), 4.03 – 3.96 (m, 2H), 3.93 (s, 3H), 2.63 – 2.50 (m, 1H), 2.40 (dd,  $J_1 = 12.2$  Hz,  $J_2 = 3.8$  Hz, 1H), 2.34 (s, 6H)

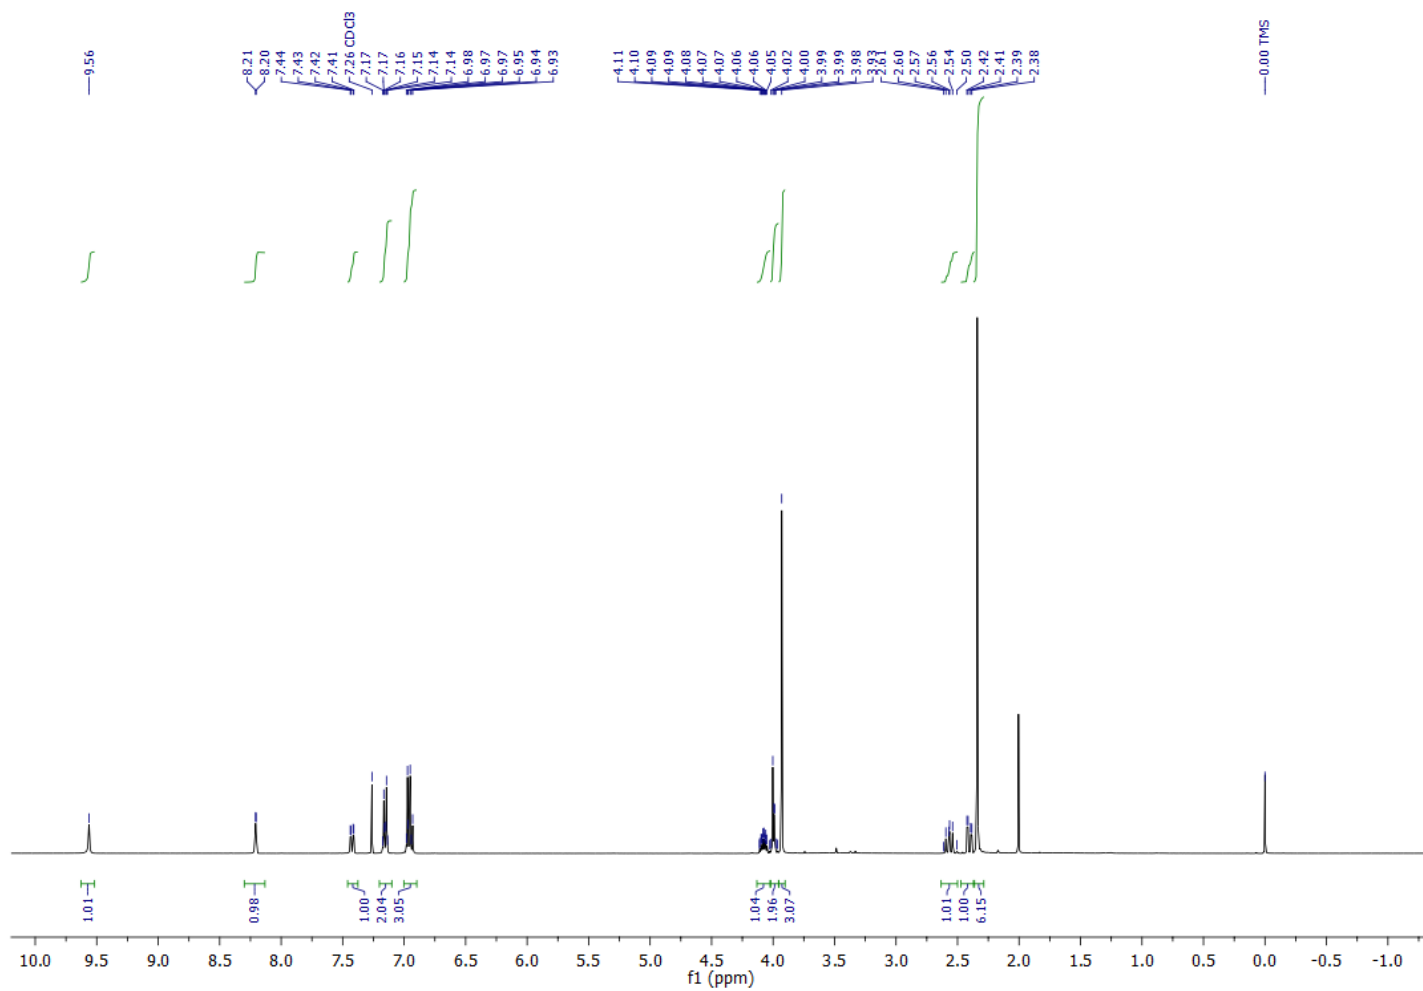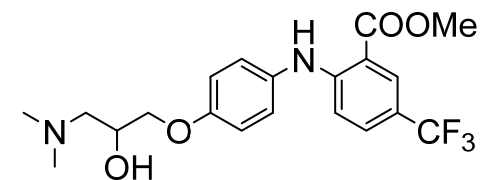

$^{13}\text{C}$  NMR (101 MHz,  $\text{CDCl}_3$ )  $\delta$  168.32, 156.81, 151.90, 132.36, 130.66 (q,  $J = 3.2$  Hz), 129.40 (q,  $J = 3.9$  Hz), 126.68, 124.48 (q,  $J = 270.6$  Hz), 117.87 (q,  $J = 33.2$  Hz), 115.66, 113.40, 109.92, 70.84, 66.31, 61.92, 52.11, 45.67; HRMS (ESI $^+$ )  $\text{C}_{20}\text{H}_{24}\text{F}_3\text{N}_2\text{O}_4$  ( $[\text{M}+\text{H}]^+$ ) calculated 413.1683 found 413.1672

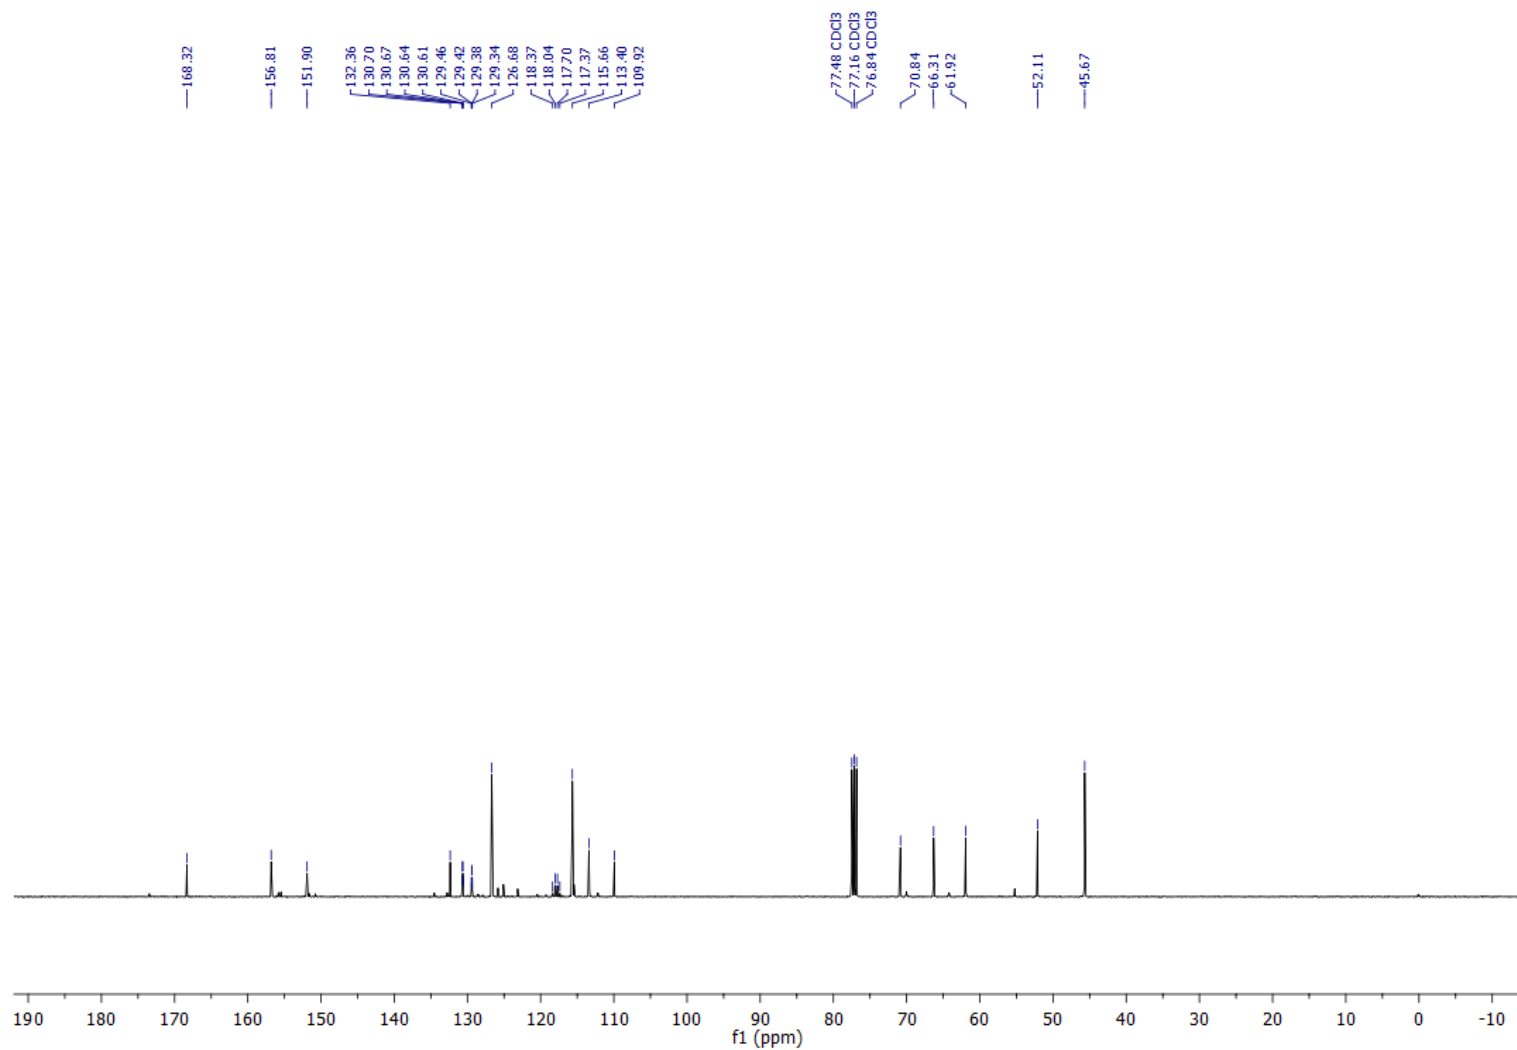

**1-(Dimethylamino)-3-(4-((2,4-dinitrophenyl)amino)phenoxy)propan-2-ol (6d)**

$^1\text{H}$  NMR (400 MHz, DMSO)  $\delta$  10.09 (s, 1H), 8.89 (d,  $J = 2.7$  Hz, 1H), 8.20 (dd,  $J_1 = 9.6$  Hz,  $J_2 = 2.8$  Hz, 1H), 7.33 – 7.22 (m, 2H), 7.12 – 7.04 (m, 2H), 6.97 (d,  $J = 9.6$  Hz, 1H), 4.88 (d,  $J = 3.8$  Hz, 1H), 4.02 (dd,  $J_1 = 9.0$  Hz,  $J_2 = 2.9$  Hz, 1H), 3.97 – 3.86 (m, 2H), 2.46 – 2.27 (m, 2H), 2.21 (s, 6H)

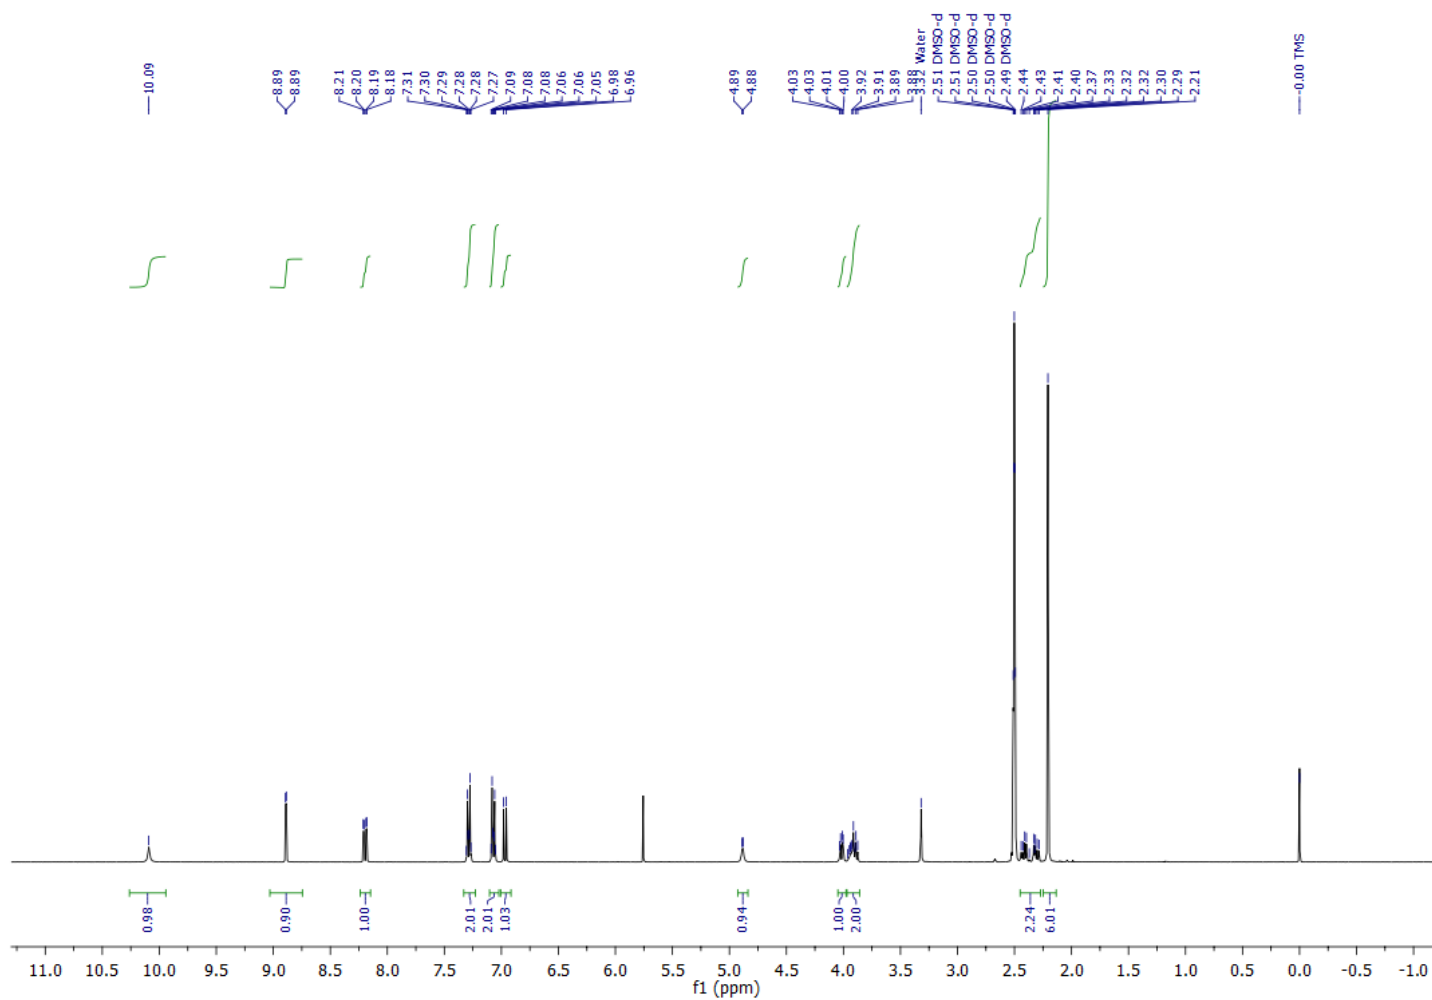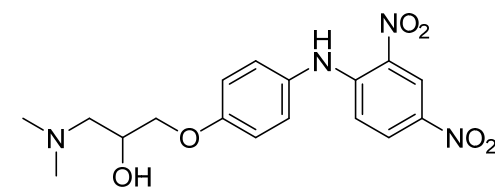



$^{13}\text{C}$  NMR (101 MHz,  $\text{CDCl}_3$ )  $\delta$  158.39, 148.03, 137.16, 130.80, 129.97, 129.51, 127.53, 124.19, 116.16, 116.11, 70.86, 66.15, 61.78, 45.65. HRMS (ESI $^+$ ) for  $\text{C}_{17}\text{H}_{21}\text{N}_4\text{O}_6$  ( $[\text{M}+\text{H}]^+$ ) calculated 377.1456 found 377.1447

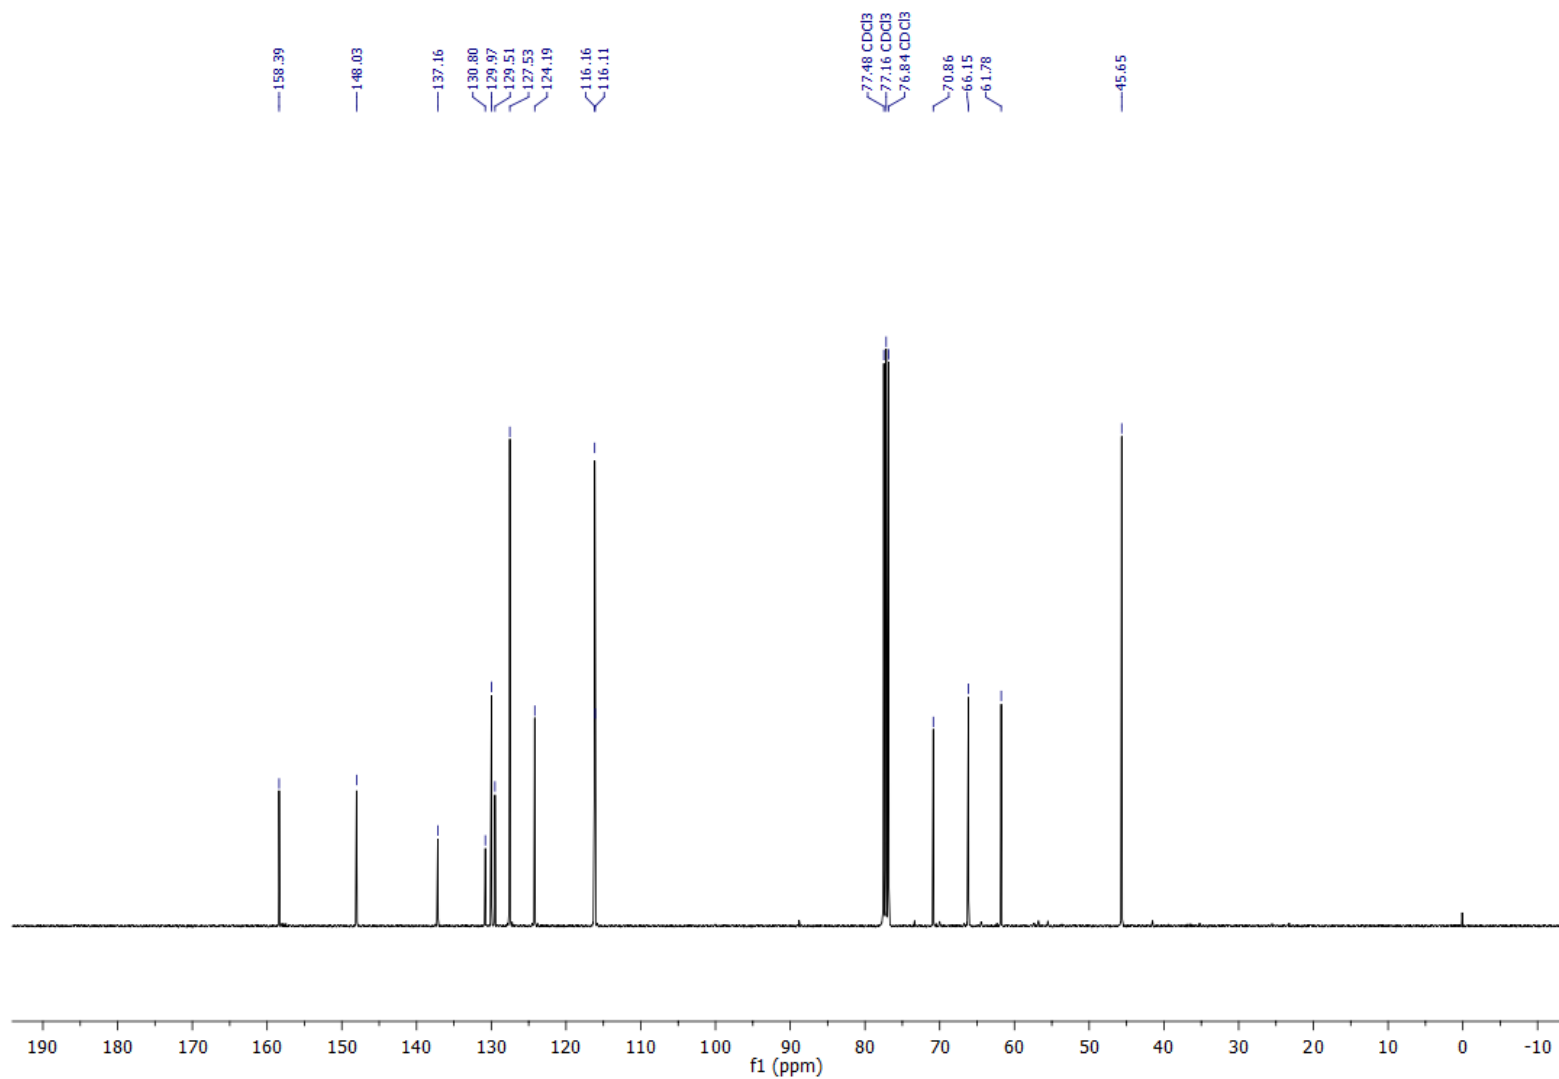

***N*-(4-hydroxyphenyl)-2-nitro-4-(trifluoromethyl)benzamide (7)**

$^1\text{H}$  NMR (400 MHz, DMSO)  $\delta$  10.52 (s, 1H), 9.34 (s, 1H), 8.49 (d,  $J = 0.8$  Hz, 1H), 8.26 (dd,  $J_1 = 8.0$  Hz,  $J_2 = 1.1$  Hz, 1H), 8.00 (d,  $J = 7.9$  Hz, 1H), 7.49 – 7.36 (m, 2H), 6.83 – 6.68 (m, 2H)

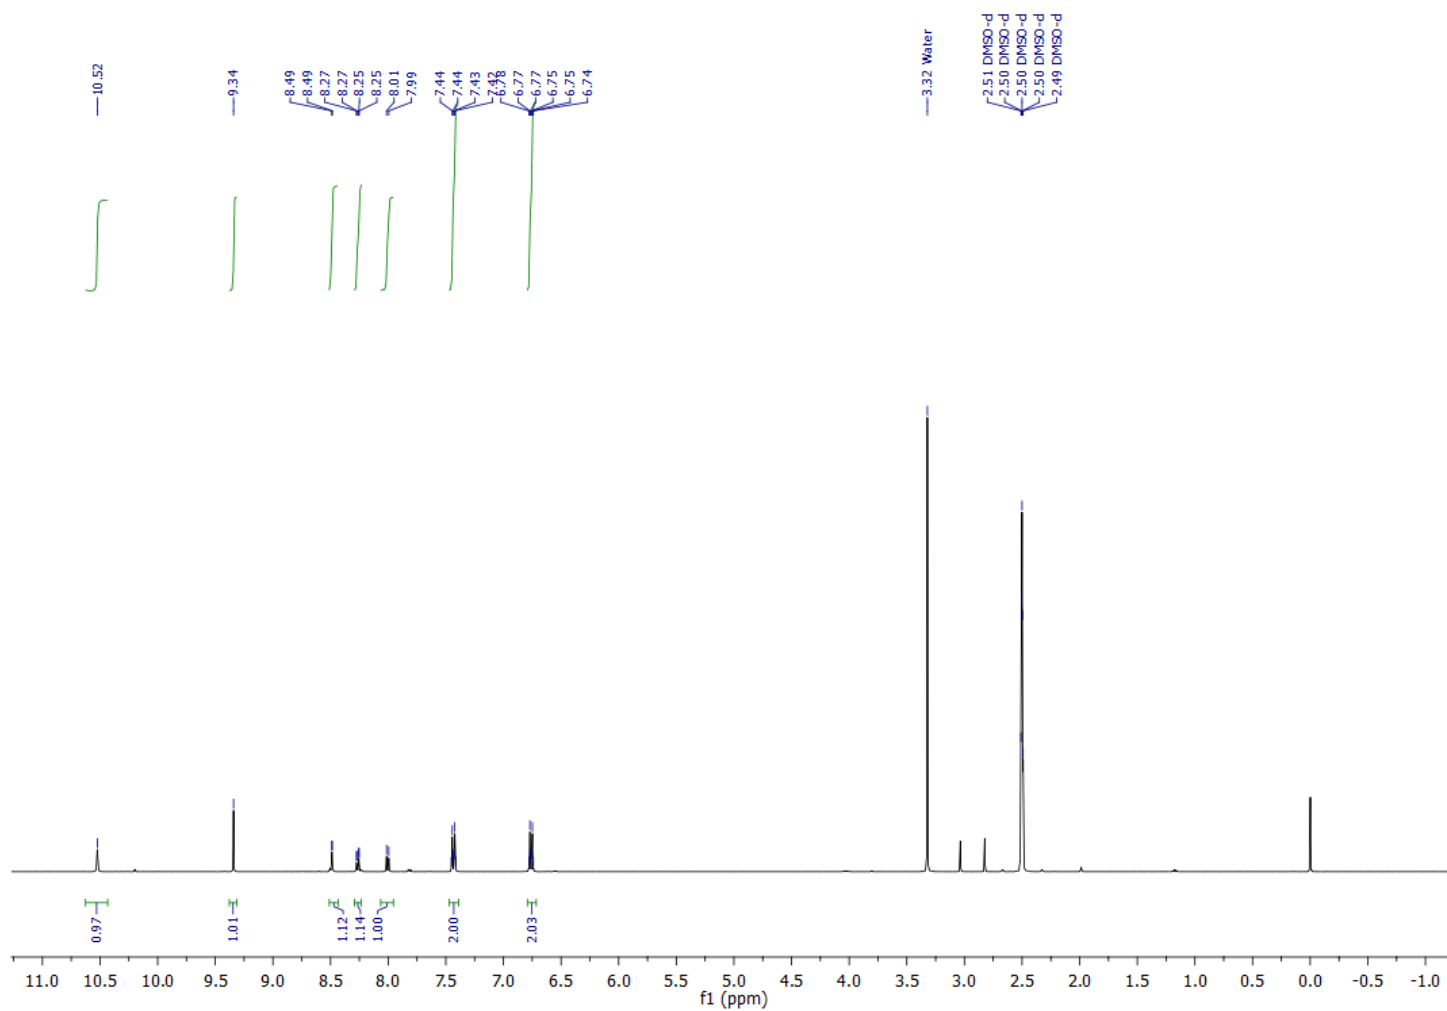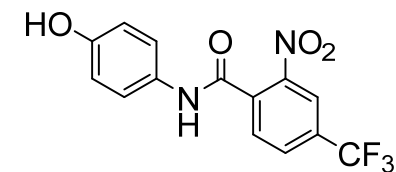

## 2-((4-Hydroxyphenyl)amino)benzoic acid (8a)

$^1\text{H}$  NMR (400 MHz, DMSO)  $\delta$  12.90 (s, 1H), 9.42 (brs, 1H), 9.34 (brs, 1H), 7.84 (dd,  $J_1 = 8.0$  Hz,  $J_2 = 1.6$  Hz, 1H), 7.30 (ddd,  $J_1 = 8.7$  Hz,  $J_2 = 7.1$  Hz,  $J_3 = 1.7$  Hz, 1H), 7.08 – 7.02 (m, 2H), 6.86 (dd,  $J_1 = 8.5$  Hz,  $J_2 = 0.7$  Hz, 1H), 6.83 – 6.77 (m, 2H), 6.69 – 6.62 (m, 1H)

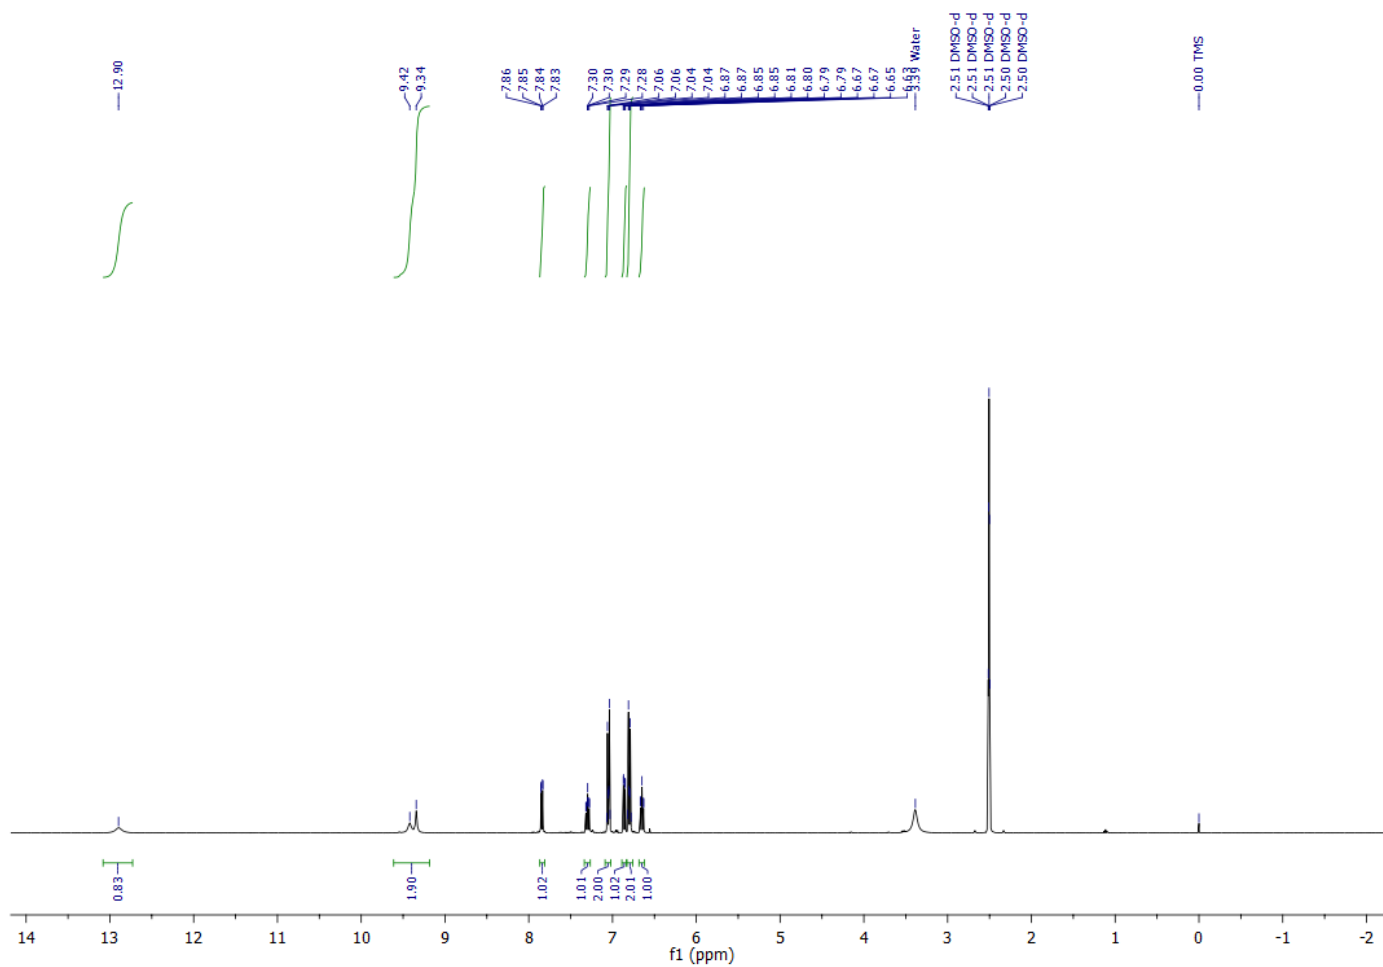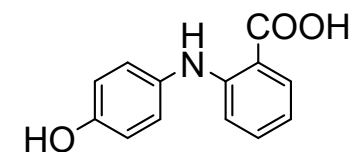

**2-((4-Hydroxyphenyl)amino)-5-(trifluoromethyl)benzoic acid (8b)**

$^1\text{H}$  NMR (400 MHz, DMSO)  $\delta$  9.69 (s, 1H), 9.54 (brs, 1H), 8.08 (d,  $J = 1.7$  Hz, 1H), 7.58 (dd,  $J_1 = 9.0$  Hz,  $J_2 = 2.2$  Hz, 1H), 7.14 – 7.06 (m, 2H), 6.91 (d,  $J = 8.9$  Hz, 1H), 6.86 – 6.79 (m, 2H)

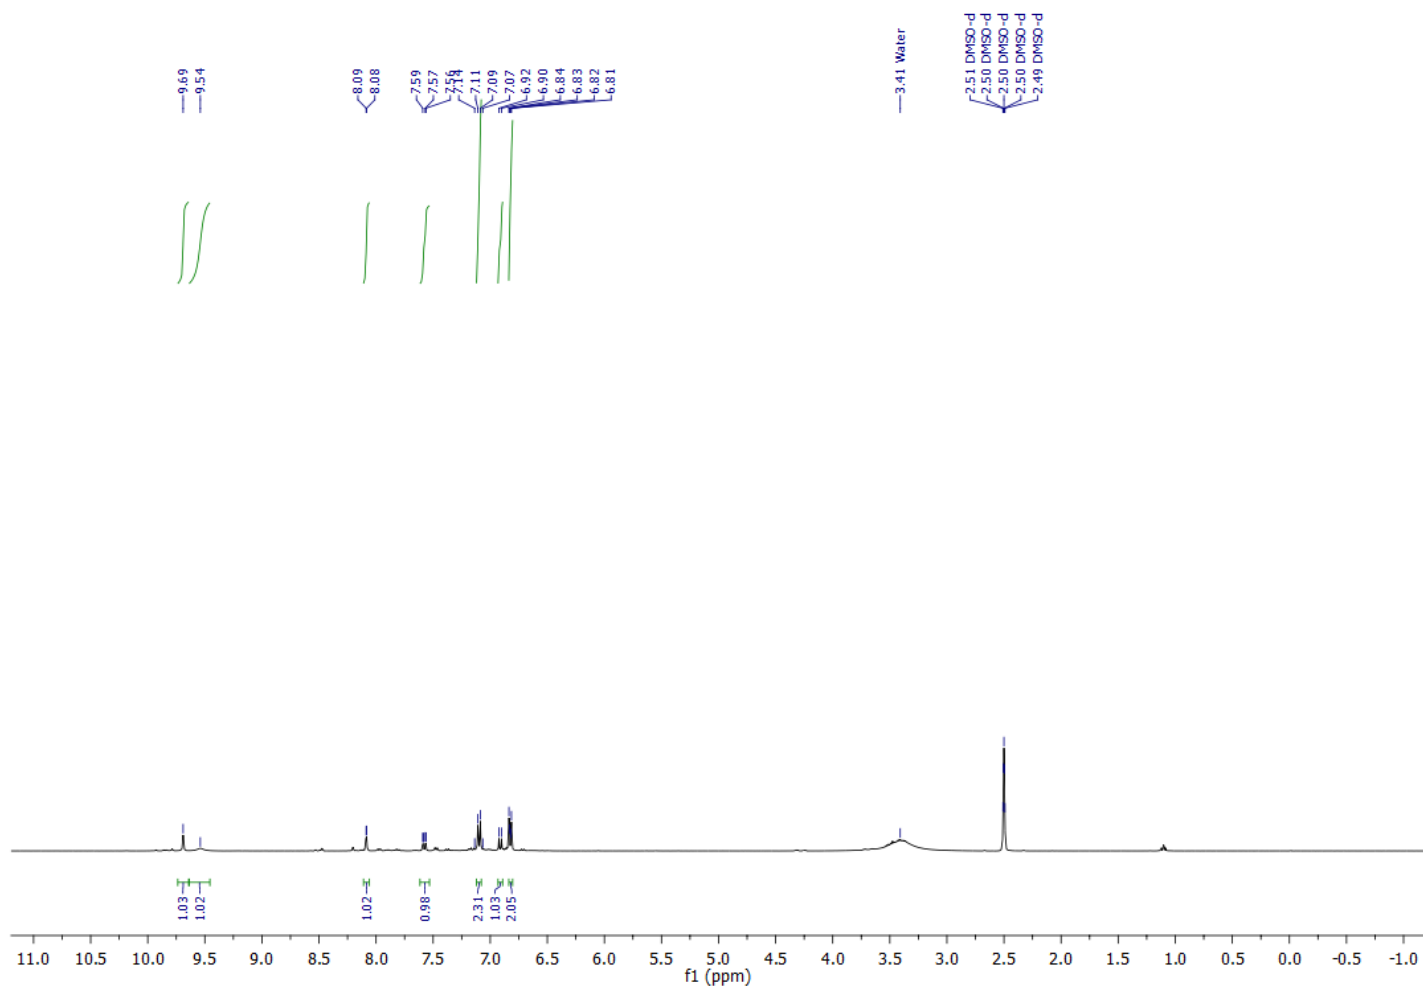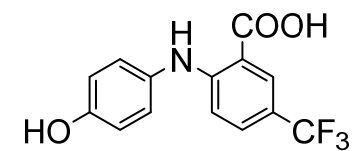

### Methyl 2-((4-hydroxyphenyl)amino)benzoate (9a)

$^1\text{H}$  NMR (400 MHz, DMSO)  $\delta$  9.38 (s, 1H), 9.08 (s, 1H), 7.85 (dd,  $J_1 = 8.0$  Hz,  $J_2 = 1.6$  Hz, 1H), 7.32 (ddd,  $J_1 = 8.6$  Hz,  $J_2 = 7.2$  Hz,  $J_3 = 1.6$  Hz, 1H), 7.09 – 7.02 (m, 2H), 6.86 (dd,  $J_1 = 8.6$  Hz,  $J_2 = 0.8$  Hz, 1H), 6.83 – 6.76 (m, 2H), 6.67 (ddd,  $J = 8.1$  Hz,  $J_2 = 7.1$  Hz,  $J_3 = 1.1$  Hz, 1H), 3.84 (s, 3H)

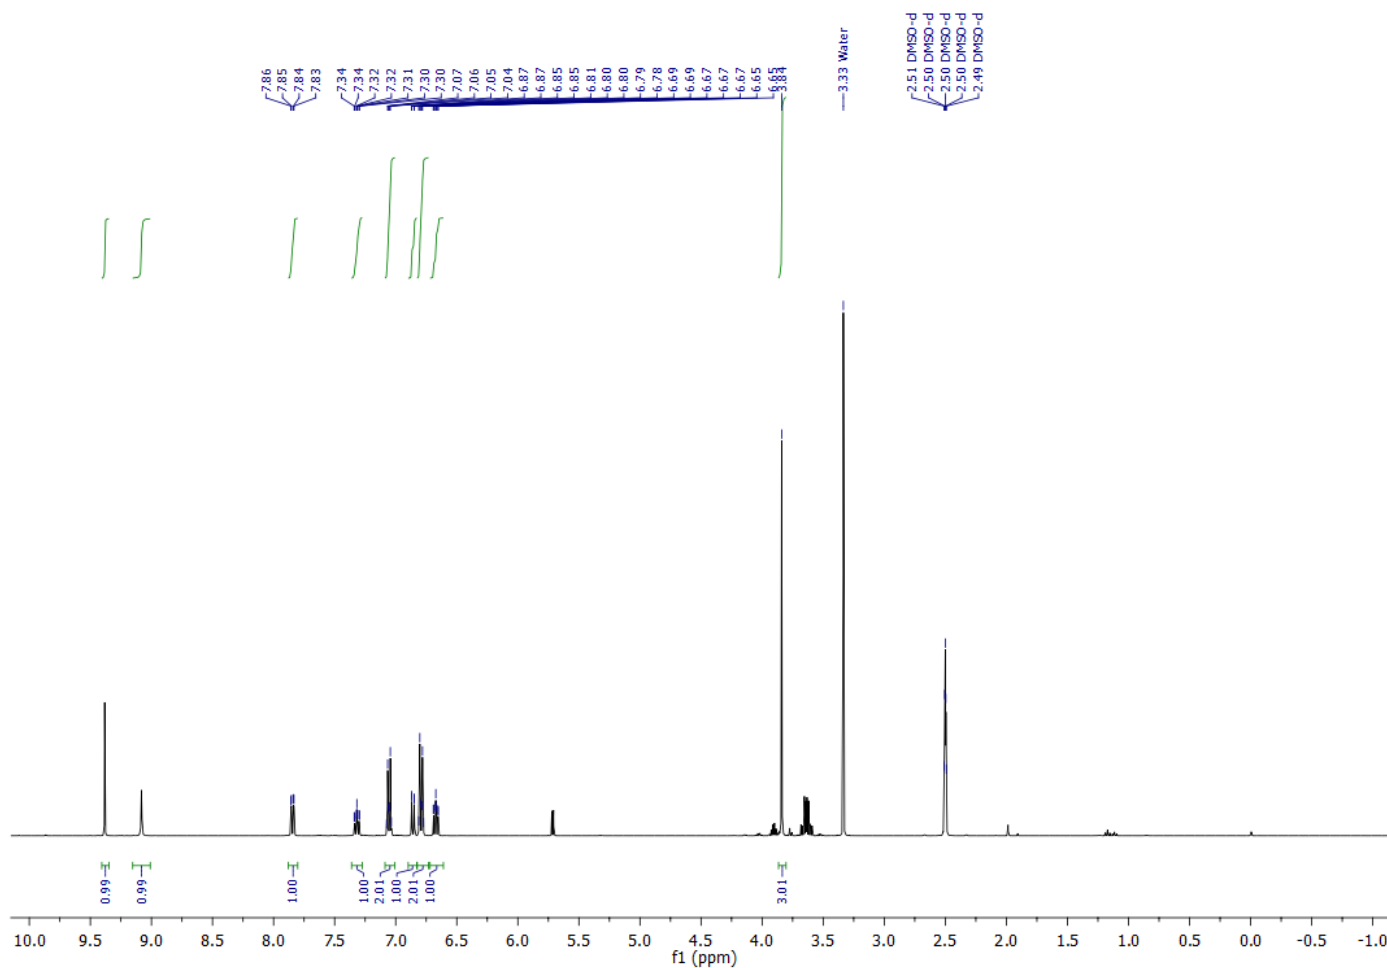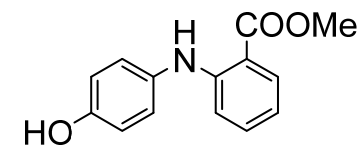

**Methyl 2-((4-hydroxyphenyl)amino)-5-(trifluoromethyl)benzoate (9b)**

$^1\text{H}$  NMR (400 MHz, DMSO)  $\delta$  9.54 (s, 1H), 9.41 (s, 1H), 8.09 (d,  $J = 1.7$  Hz, 1H), 7.61 (dd,  $J_1 = 9.1$  Hz,  $J_2 = 2.2$  Hz, 1H), 7.10 (d,  $J = 8.7$  Hz, 2H), 6.91 (d,  $J = 9.0$  Hz, 1H), 6.86 – 6.73 (m, 2H), 3.88 (s, 3H)

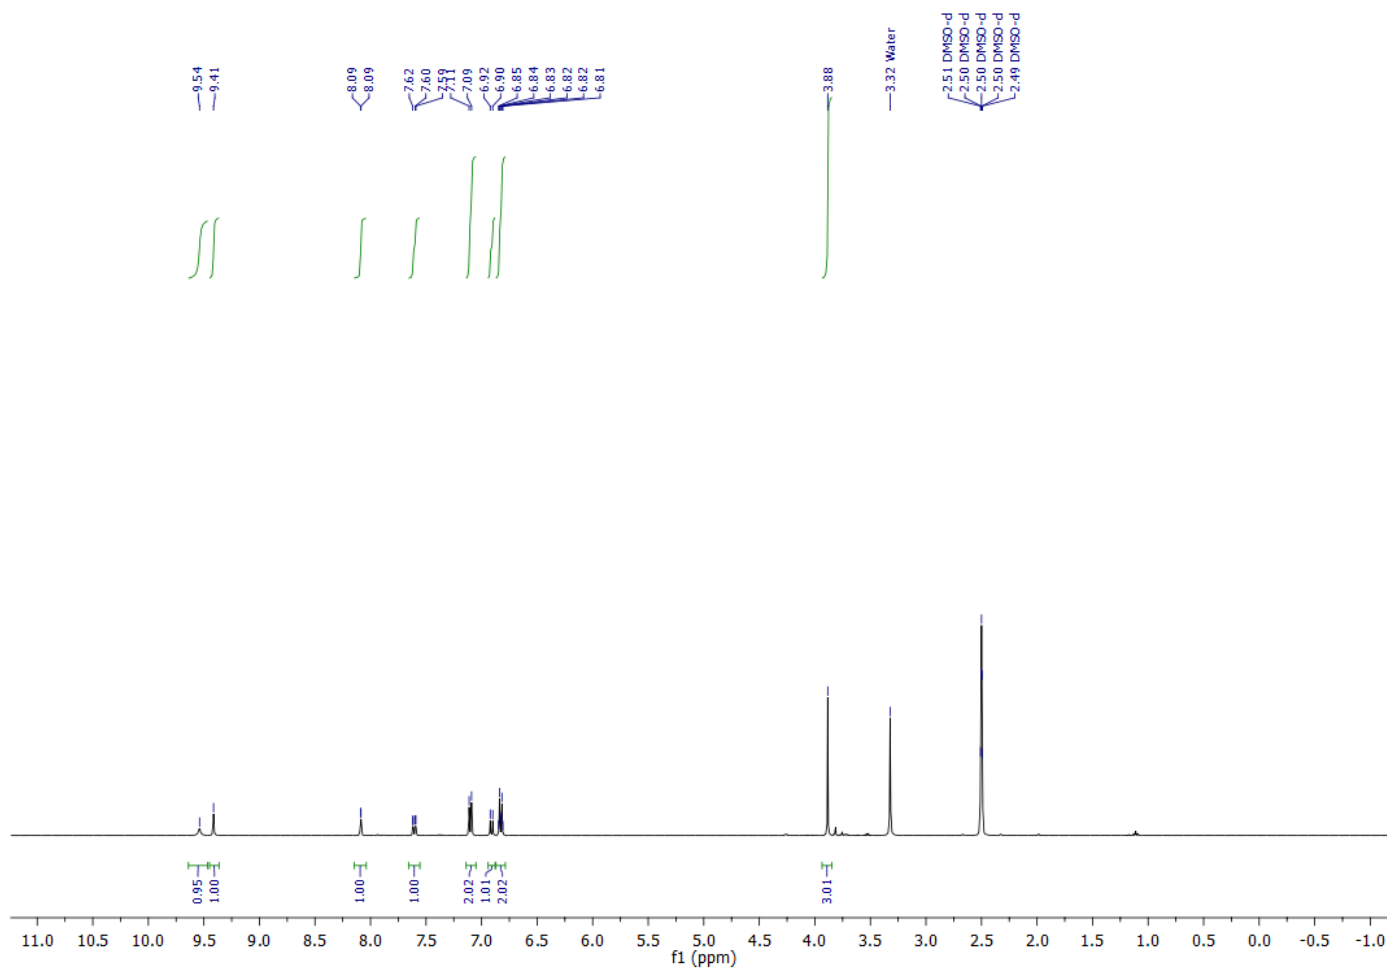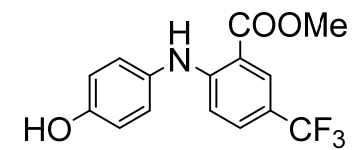

## 2-((4-(2-Hydroxy-3-morpholinopropoxy)phenyl)amino)benzoic acid (10a)

$^1\text{H}$  NMR (400 MHz, DMSO)  $\delta$  11.50 (s, 1H), 7.90 (dd,  $J_1 = 7.7$  Hz,  $J_2 = 1.6$  Hz, 1H), 7.11 – 7.02 (m, 3H), 6.98 (d,  $J = 7.6$  Hz, 1H), 6.88 (d,  $J = 8.9$  Hz, 2H), 6.62 – 6.49 (m, 1H), 4.95 (brs, 1H), 4.01 – 3.89 (m, 2H), 3.88 – 3.75 (m, 1H), 3.56 (t,  $J = 4.6$  Hz, 4H), 2.48 – 2.28 (m, 6H)

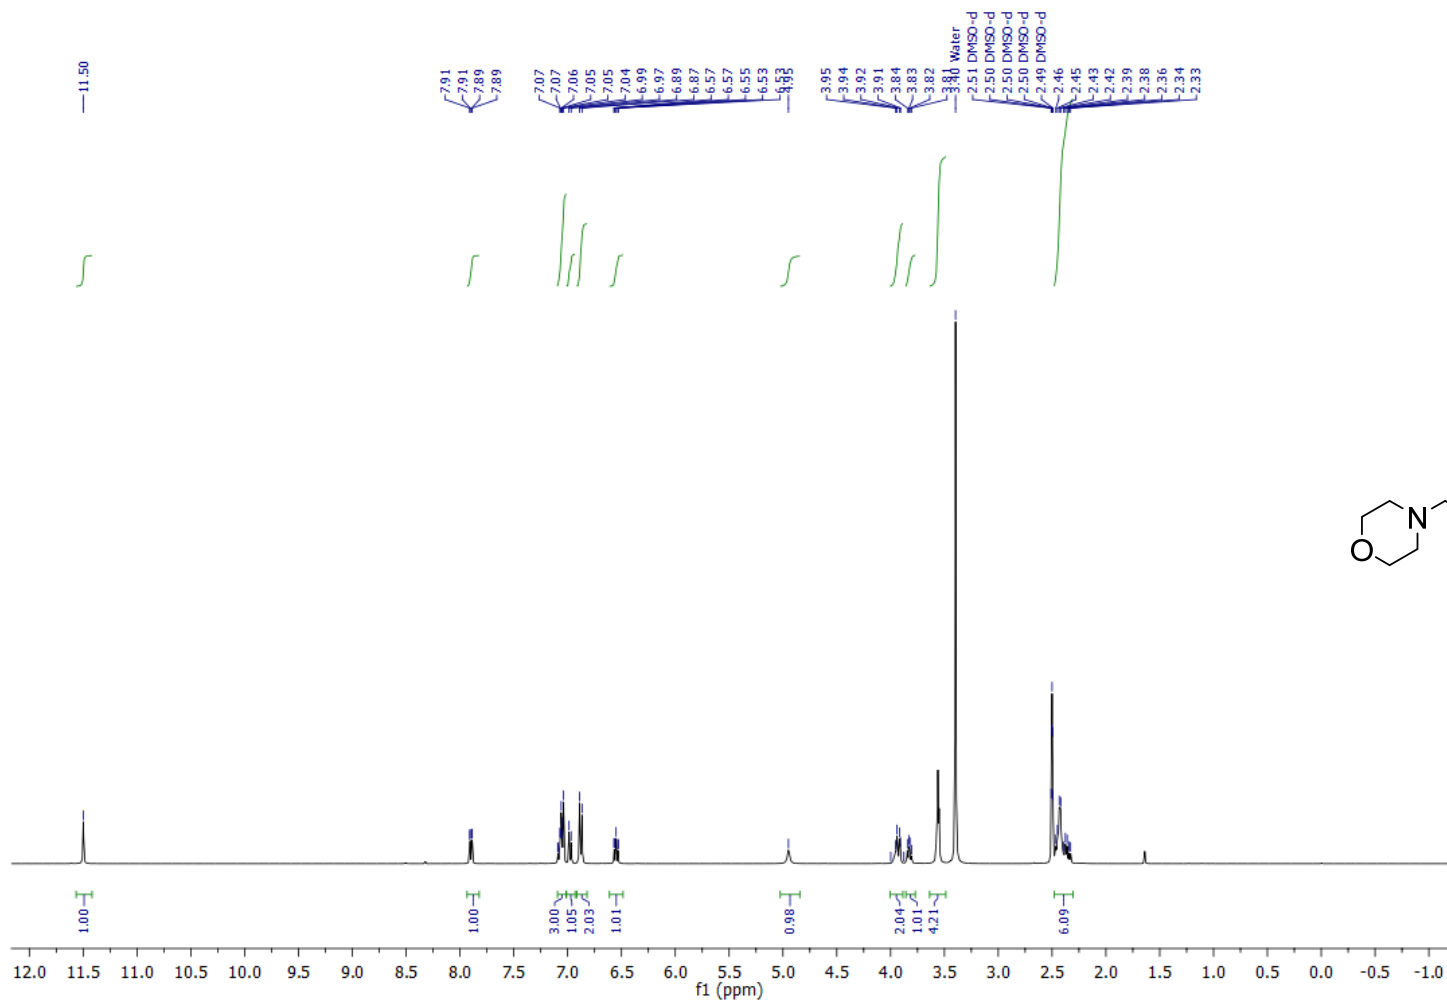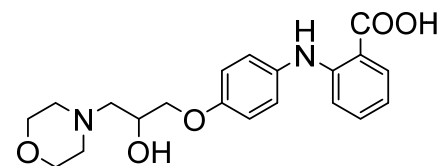

$^{13}\text{C}$  NMR (101 MHz, DMSO)  $\delta$  171.88, 153.58, 146.66, 135.84, 132.10, 129.92, 122.22, 121.71, 115.62, 115.33, 111.85, 71.34, 66.45, 66.29, 61.60, 54.09;  
HRMS (ESI<sup>+</sup>) for  $\text{C}_{20}\text{H}_{25}\text{N}_2\text{O}_5$  ( $[\text{M}+\text{H}]^+$ ) calculated 373.1758 found 373.1751

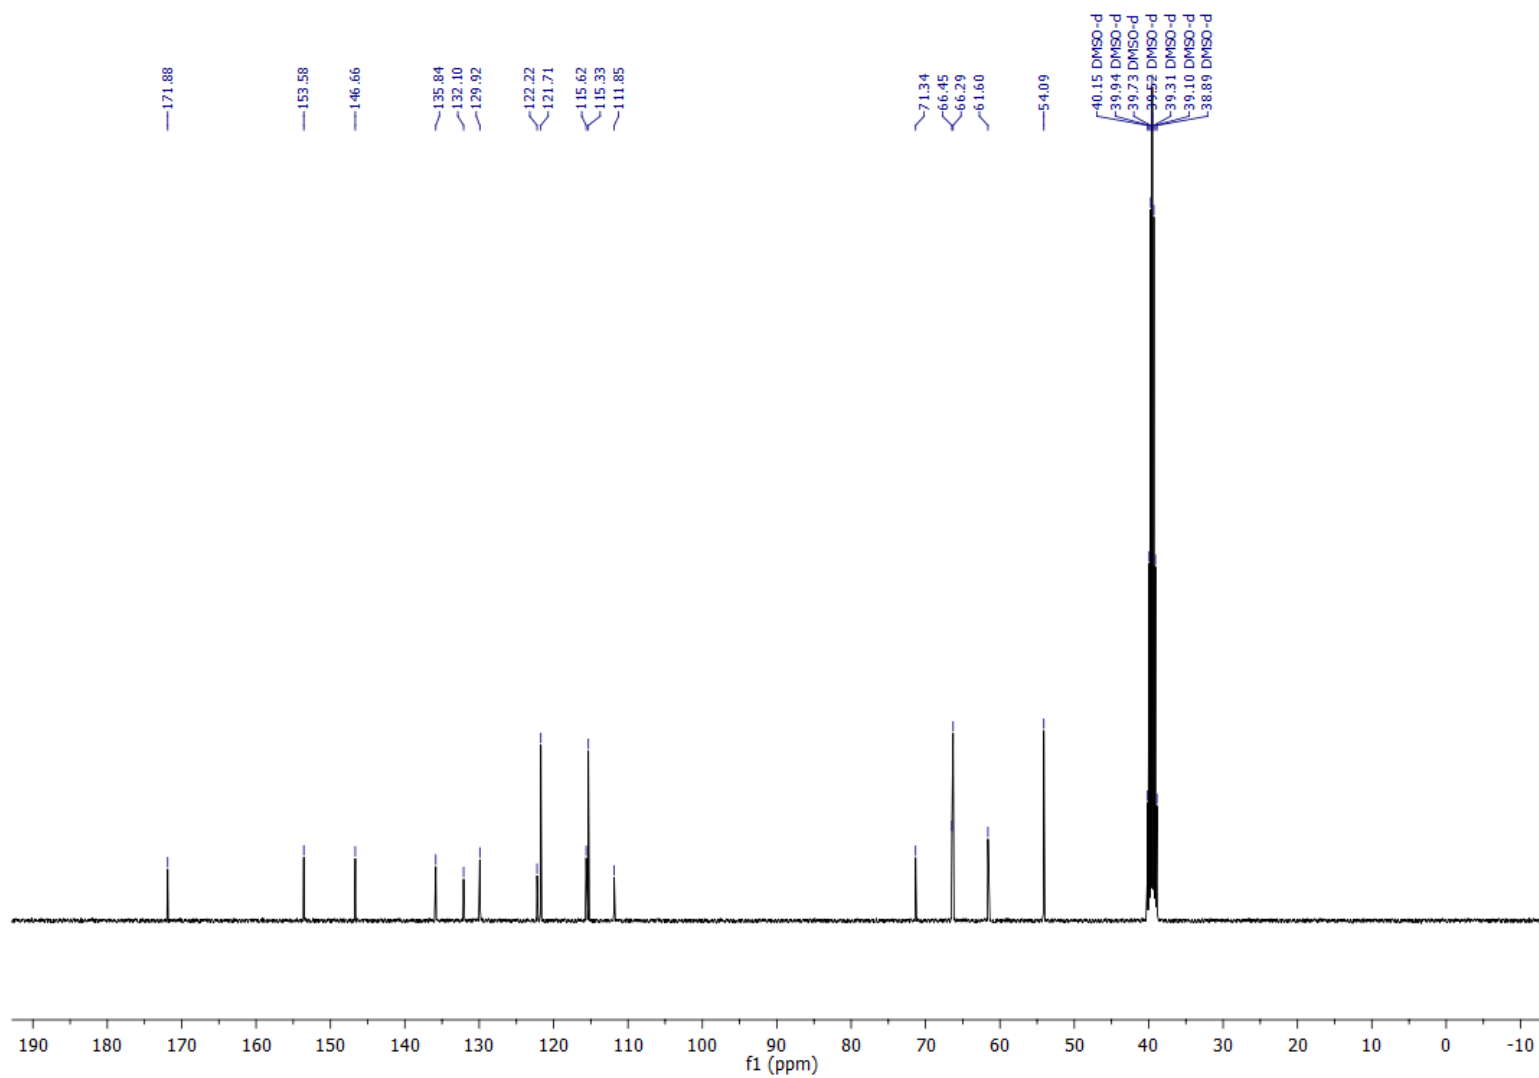



**2-((4-(3-(Dimethylamino)-2-hydroxypropoxy)phenyl)amino)-5-(trifluoromethyl)benzoic acid (10b)**

$^1\text{H}$  NMR (400 MHz, DMSO)  $\delta$  12.10 (s, 1H), 8.16 (d,  $J = 2.2$  Hz, 1H), 7.33 (dd,  $J_1 = 8.7$  Hz,  $J_2 = 2.3$  Hz, 1H), 7.10 (d,  $J = 8.8$  Hz, 2H), 6.98 (d,  $J = 8.6$  Hz, 1H), 6.93 (d,  $J = 8.9$  Hz, 2H), 4.87 (brs, 1H), 4.00 – 3.77 (m, 3H), 2.44 – 2.24 (m, 2H), 2.18 (s, 6H)

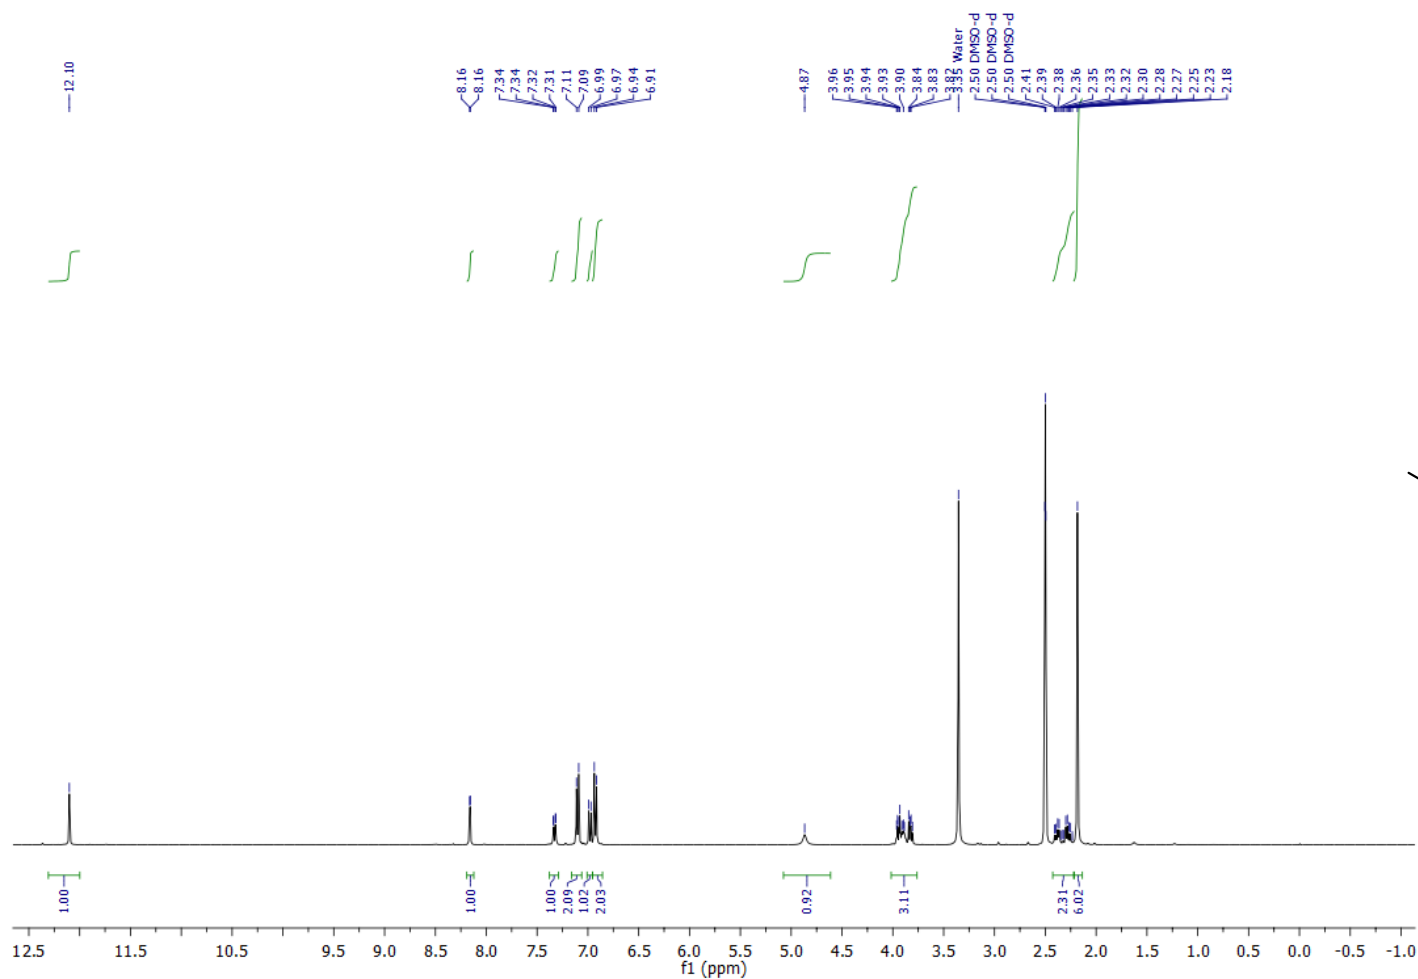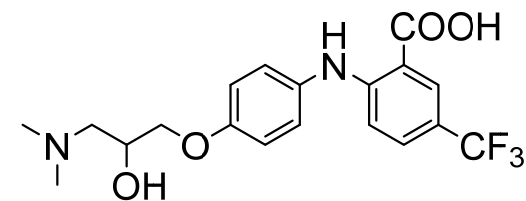

$^{13}\text{C}$  NMR (101 MHz, MeOD)  $\delta$  174.97, 157.11, 151.89, 135.41, 130.67 (q,  $J = 3.7$  Hz), 128.77 (q,  $J = 3.5$  Hz), 126.55 (q,  $J = 269.4$  Hz), 125.95, 120.53, 118.11 (q,  $J = 32.4$  Hz), 116.51, 112.99, 72.34, 68.80, 63.31, 46.21; HRMS (ESI $^{+}$ ) for  $\text{C}_{19}\text{H}_{22}\text{F}_3\text{N}_2\text{O}_4$  ( $[\text{M}+\text{H}]^{+}$ ) calculated 399.1526, found 399.1519

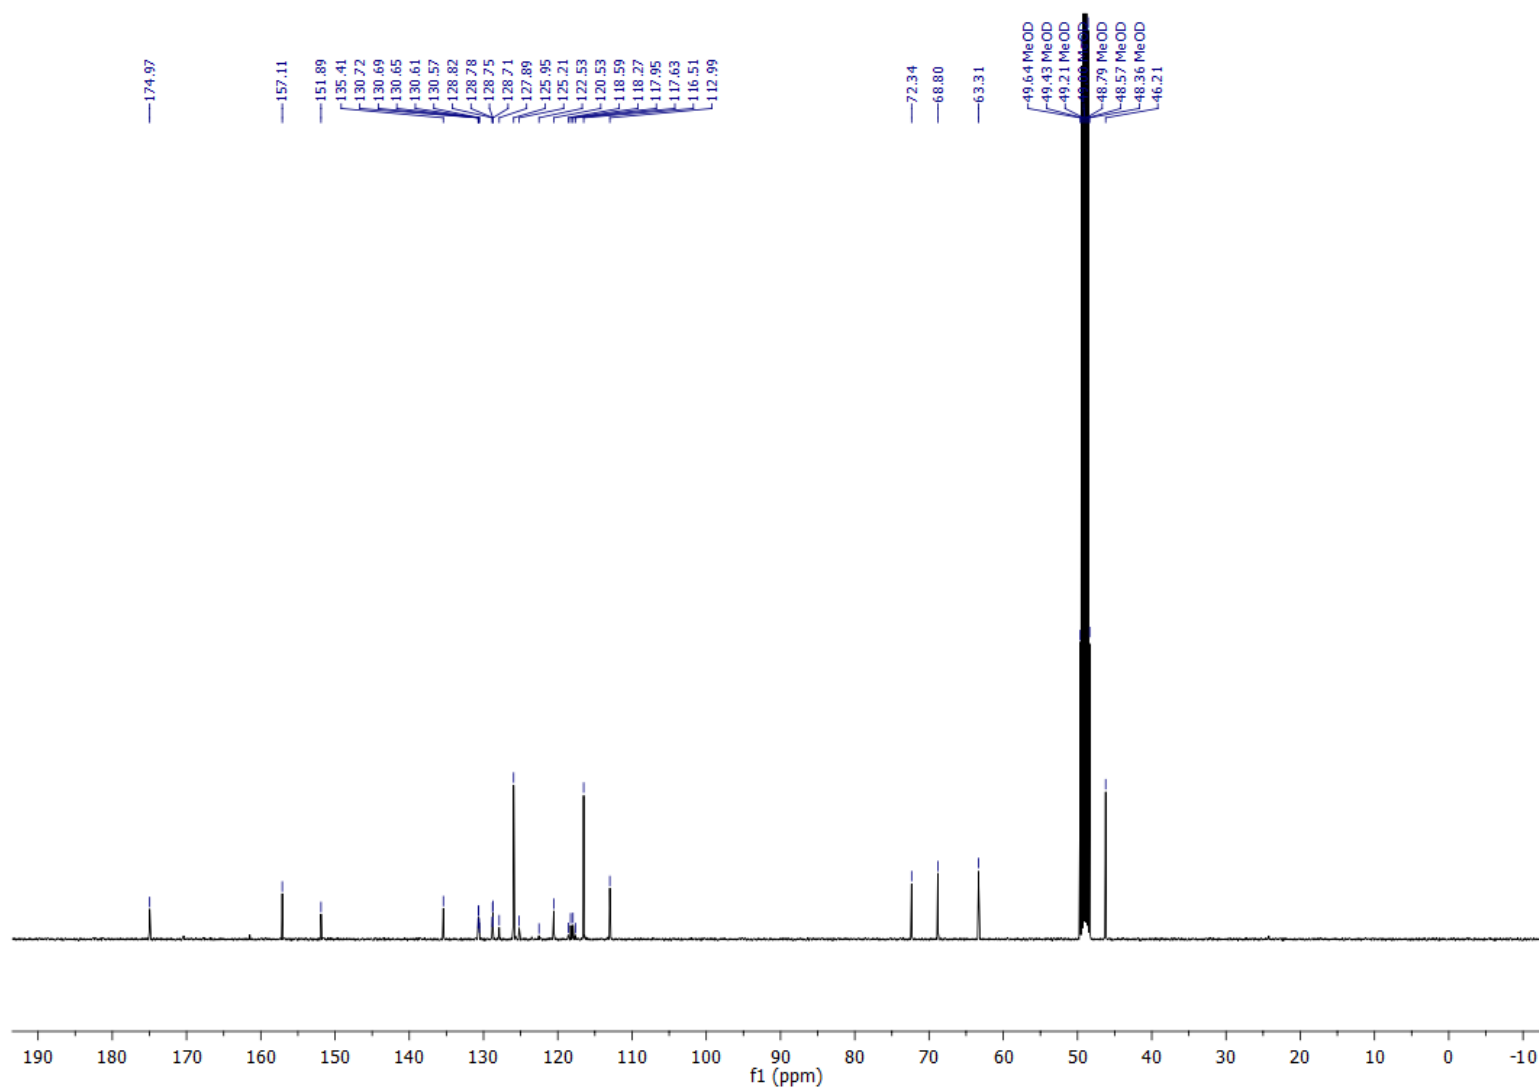

**1-Chloro-2-nitro-4-(trifluoromethyl)benzene (11)**

$^1\text{H}$  NMR (400 MHz,  $\text{CDCl}_3$ )  $\delta$  8.16 (d,  $J = 1.8$  Hz, 1H), 7.82 – 7.78 (m, 1H), 7.74 (d,  $J = 8.5$  Hz, 1H)

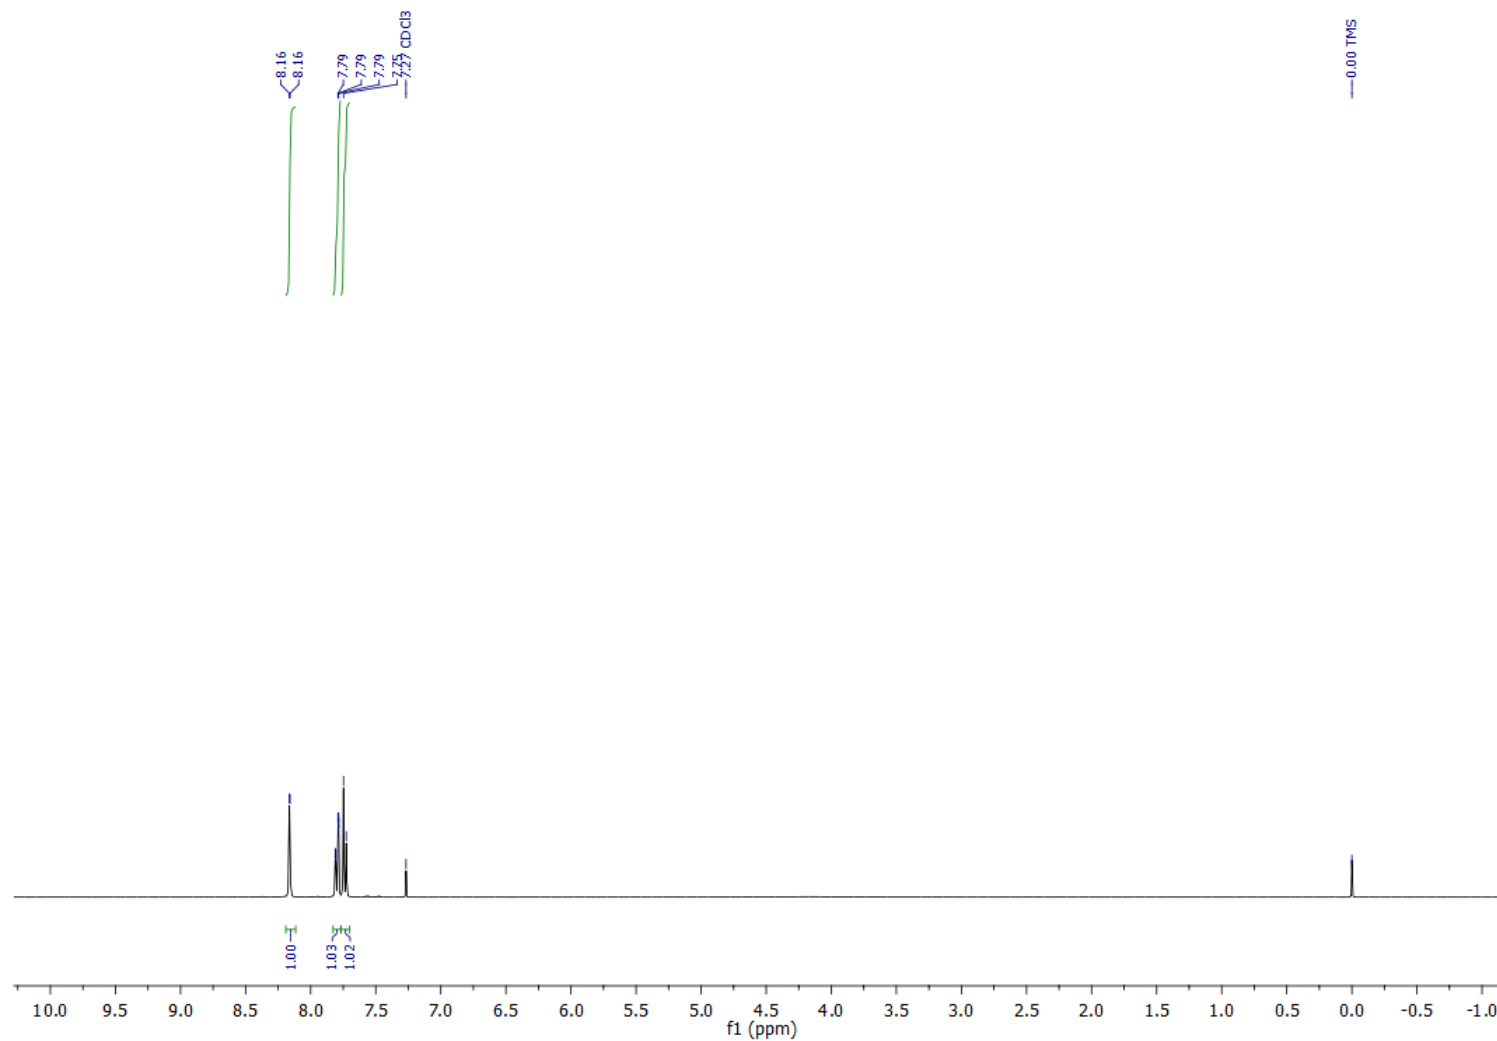

**4-((2-Nitro-4-(trifluoromethyl)phenyl)amino)phenol (12a)**

$^1\text{H}$  NMR (400 MHz,  $\text{CDCl}_3$ )  $\delta$  9.58 (s, 1H), 8.50 (d,  $J = 1.0$  Hz, 1H), 7.50 (dd,  $J_1 = 9.1$  Hz,  $J_2 = 2.2$  Hz, 1H), 7.20 – 7.10 (m, 2H), 7.04 (d,  $J = 9.1$  Hz, 1H), 6.97 – 6.87 (m, 2H), 4.99 (s, 1H)

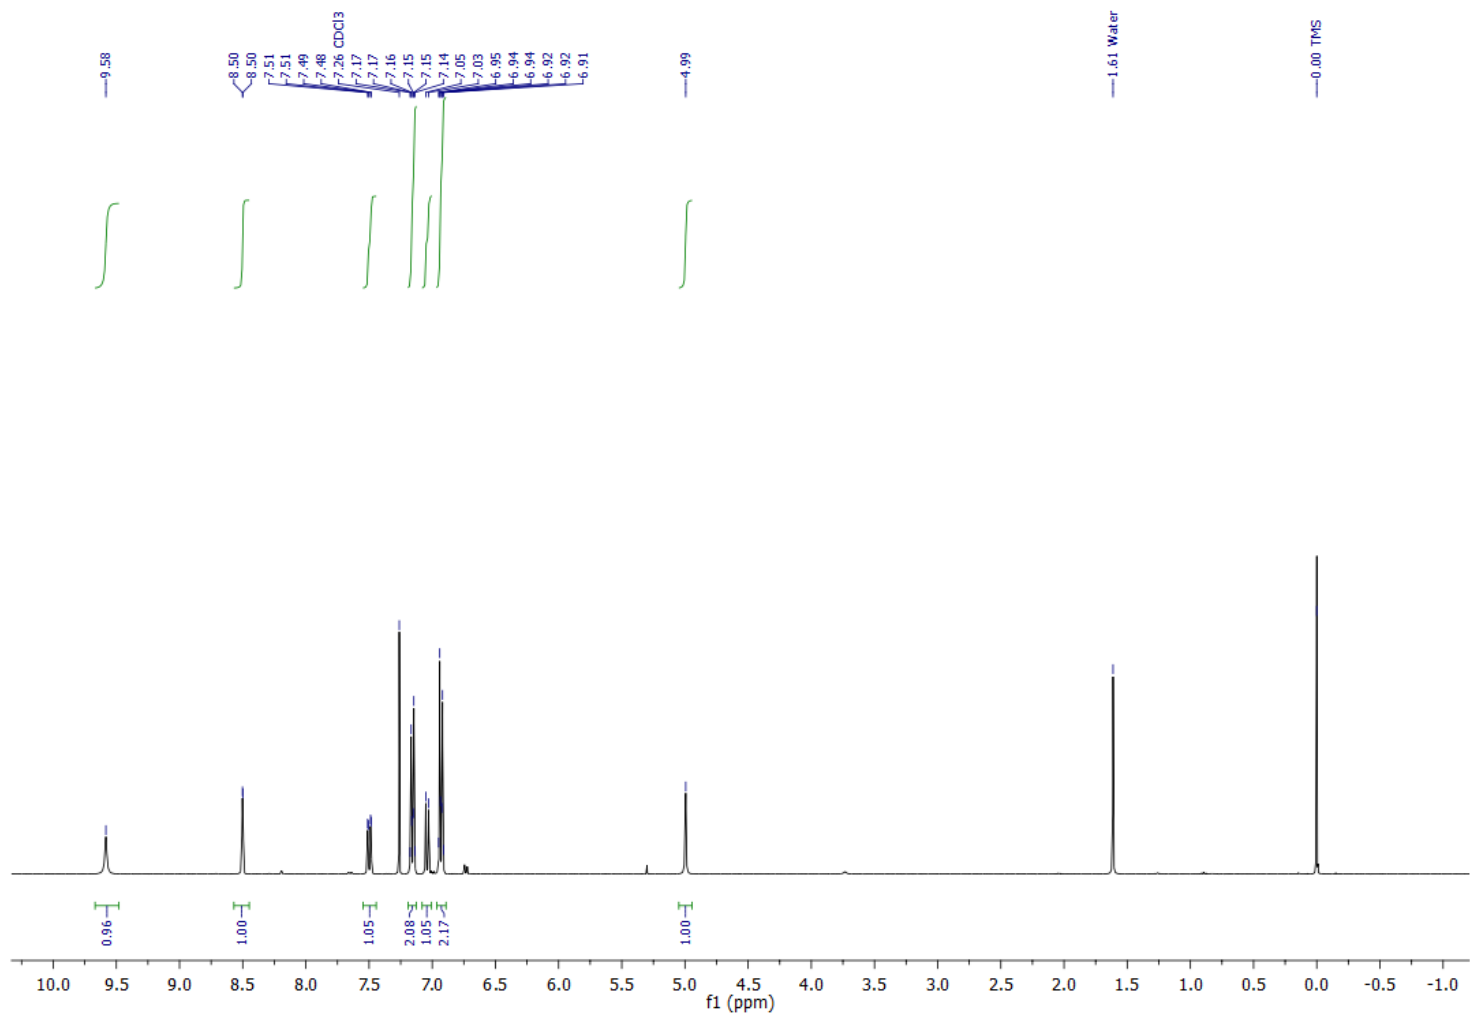

#### 4-((2,4-Dinitrophenyl)amino)phenol (12b)

$^1\text{H}$  NMR (400 MHz, DMSO)  $\delta$  10.04 (s, 1H), 9.73 (s, 1H), 8.86 (d,  $J = 2.7$  Hz, 1H), 8.17 (dd,  $J_1 = 9.6$  Hz,  $J_2 = 2.8$  Hz, 1H), 7.21 – 7.08 (m, 2H), 6.94 (d,  $J = 9.6$  Hz, 1H), 6.91 – 6.79 (m, 2H)

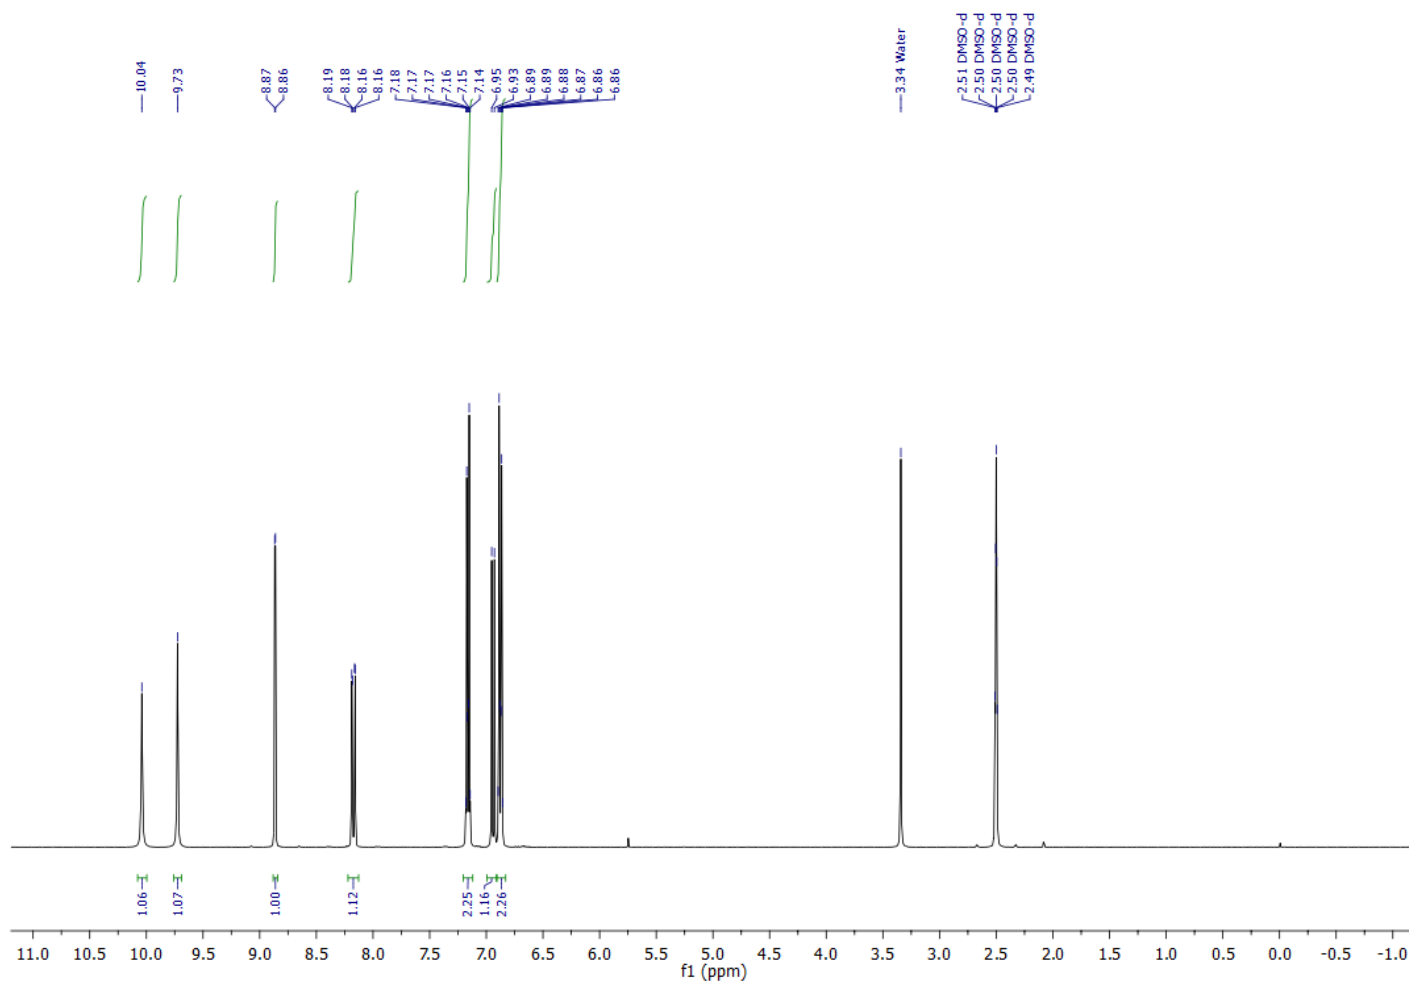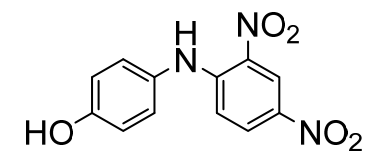

**2,6-Dibromo-4-((2-nitro-4-(trifluoromethyl)phenyl)amino)phenol (12c)**

$^1\text{H}$  NMR (400 MHz,  $\text{CDCl}_3$ )  $\delta$  9.51 (s, 1H), 8.56 – 8.45 (m, 1H), 7.59 (dd,  $J_1 = 9.0$ ,  $J_2 = 2.1$  Hz, 1H), 7.49 – 7.41 (m, 2H), 7.08 (d,  $J = 9.0$  Hz, 1H), 5.98 (s, 1H)

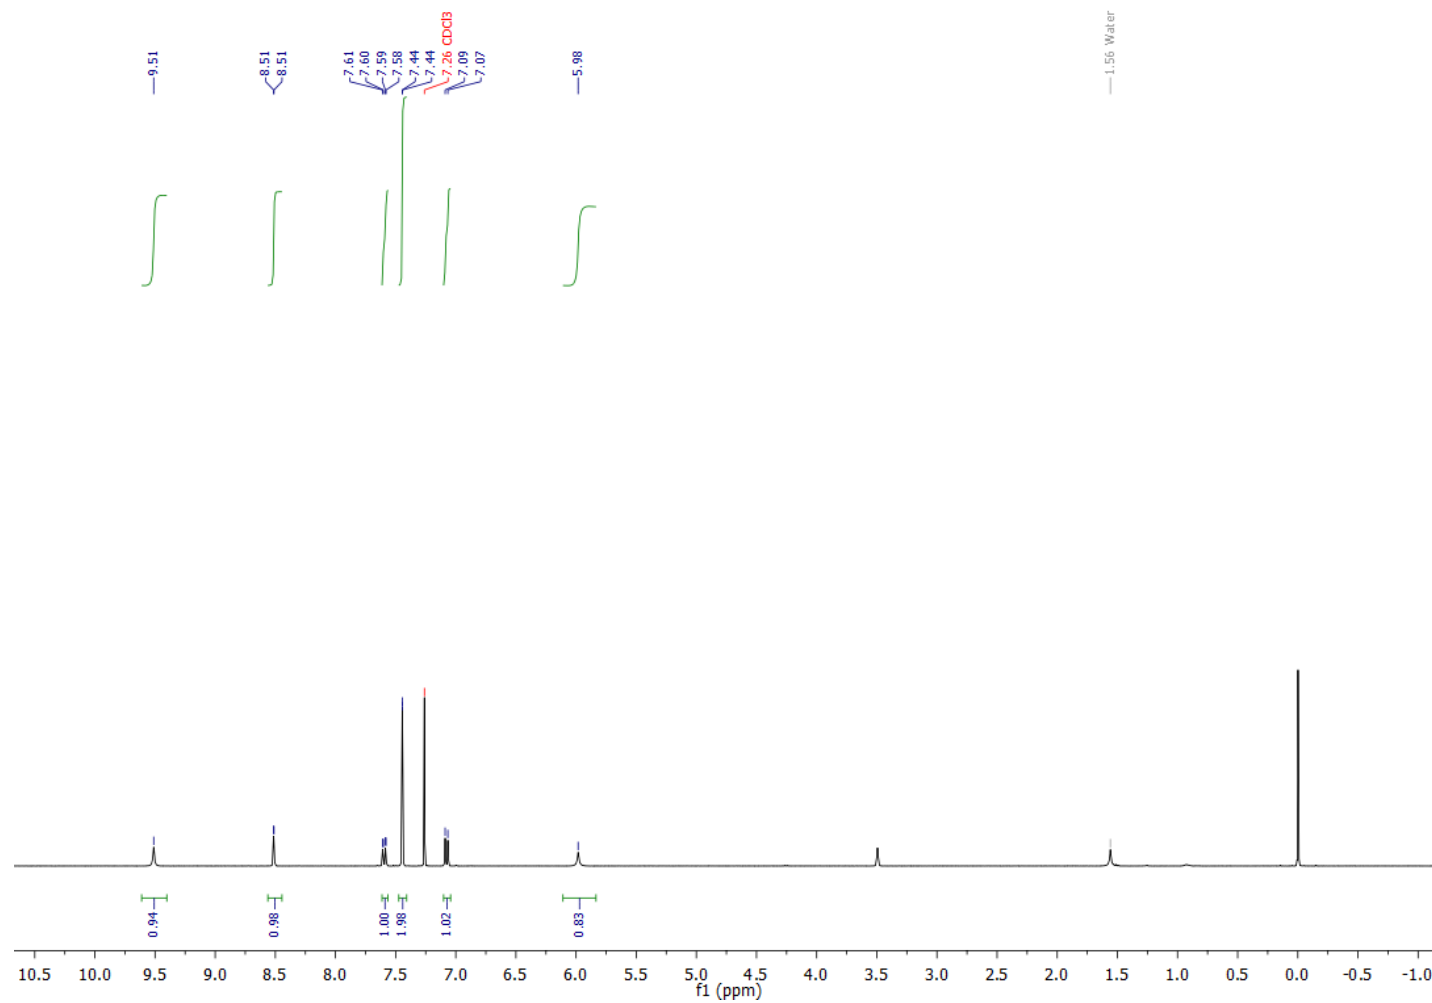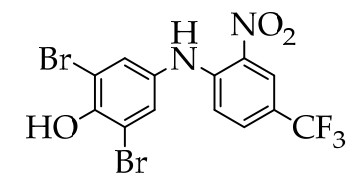

## 2,6-Dichloro-4-((2-nitro-4-(trifluoromethyl)phenyl)amino)phenol (12d)

$^1\text{H}$  NMR (400 MHz,  $\text{CDCl}_3$ )  $\delta$  9.50 (s, 1H), 8.61 – 8.35 (m, 1H), 7.59 (dd,  $J_1 = 9.0$  Hz,  $J_2 = 2.1$  Hz, 1H), 7.26 (s, 2H), 7.09 (d,  $J = 9.0$  Hz, 1H), 5.93 (s, 1H)

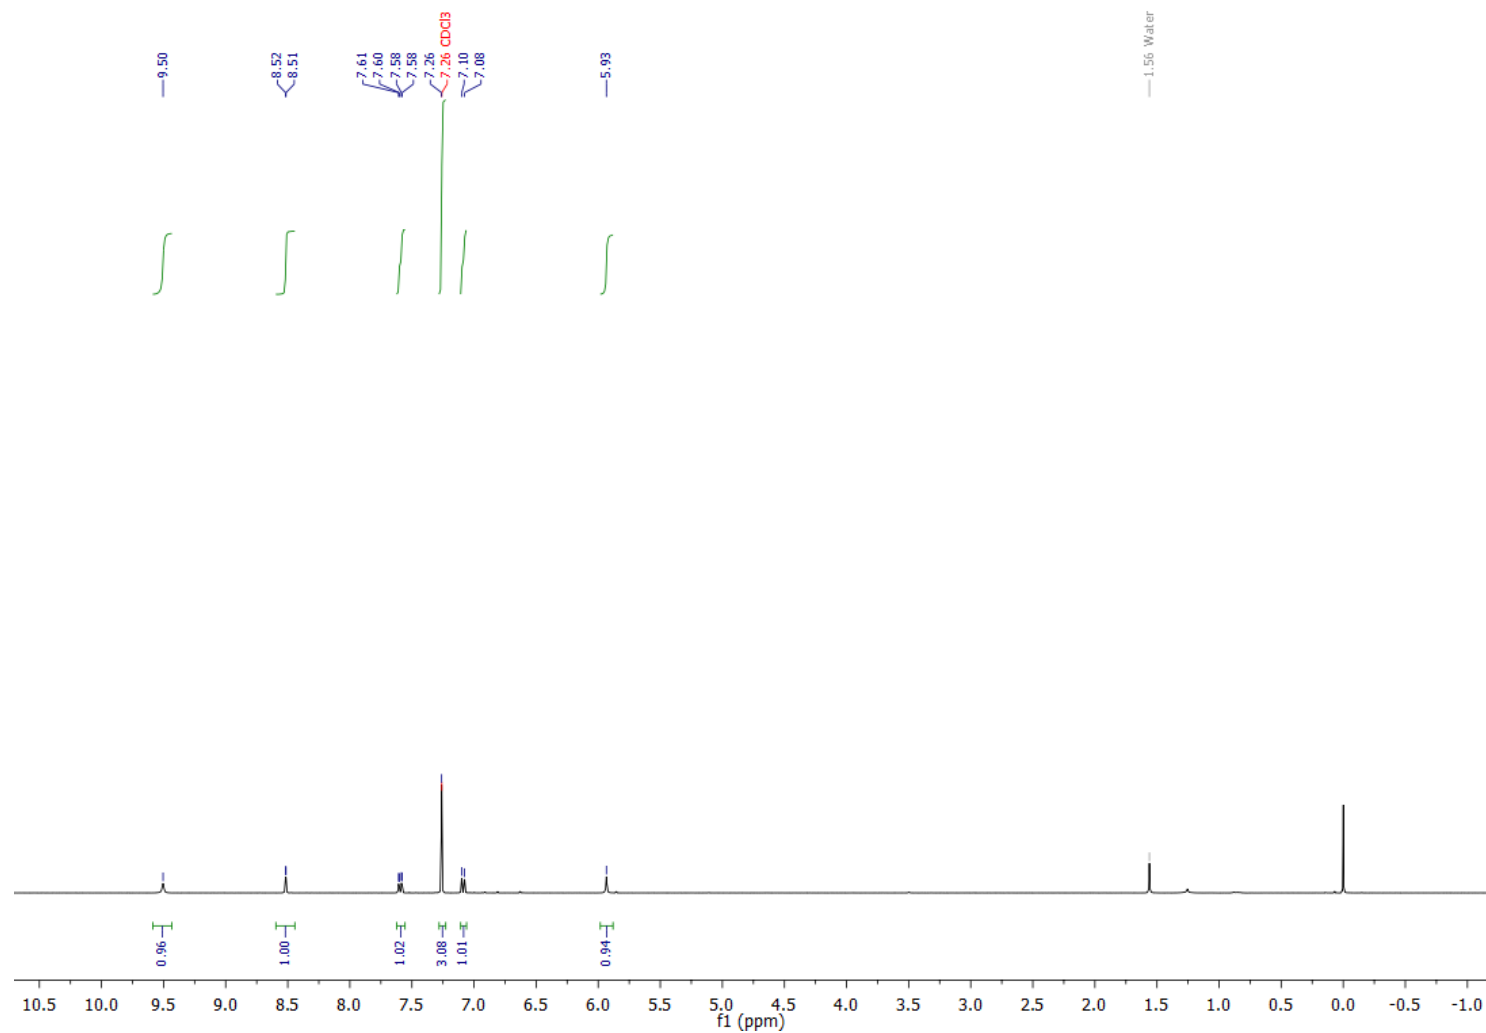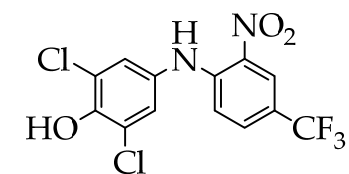

***N*-(4-(2-morpholinoethoxy)phenyl)-2-nitro-4-(trifluoromethyl)aniline (13)**

$^1\text{H}$  NMR (400 MHz,  $\text{CDCl}_3$ )  $\delta$  9.61 (s, 1H), 8.50 (d,  $J = 1.1$  Hz, 1H), 7.49 (dd,  $J_1 = 9.1$  Hz,  $J_2 = 2.1$  Hz, 1H), 7.22 – 7.15 (m, 2H), 7.05 (d,  $J = 9.1$  Hz, 1H), 7.02 – 6.96 (m, 2H), 4.15 (t,  $J = 5.7$  Hz, 2H), 3.84 – 3.68 (m, 4H), 2.84 (t,  $J = 5.7$  Hz, 2H), 2.66 – 2.53 (m, 4H)

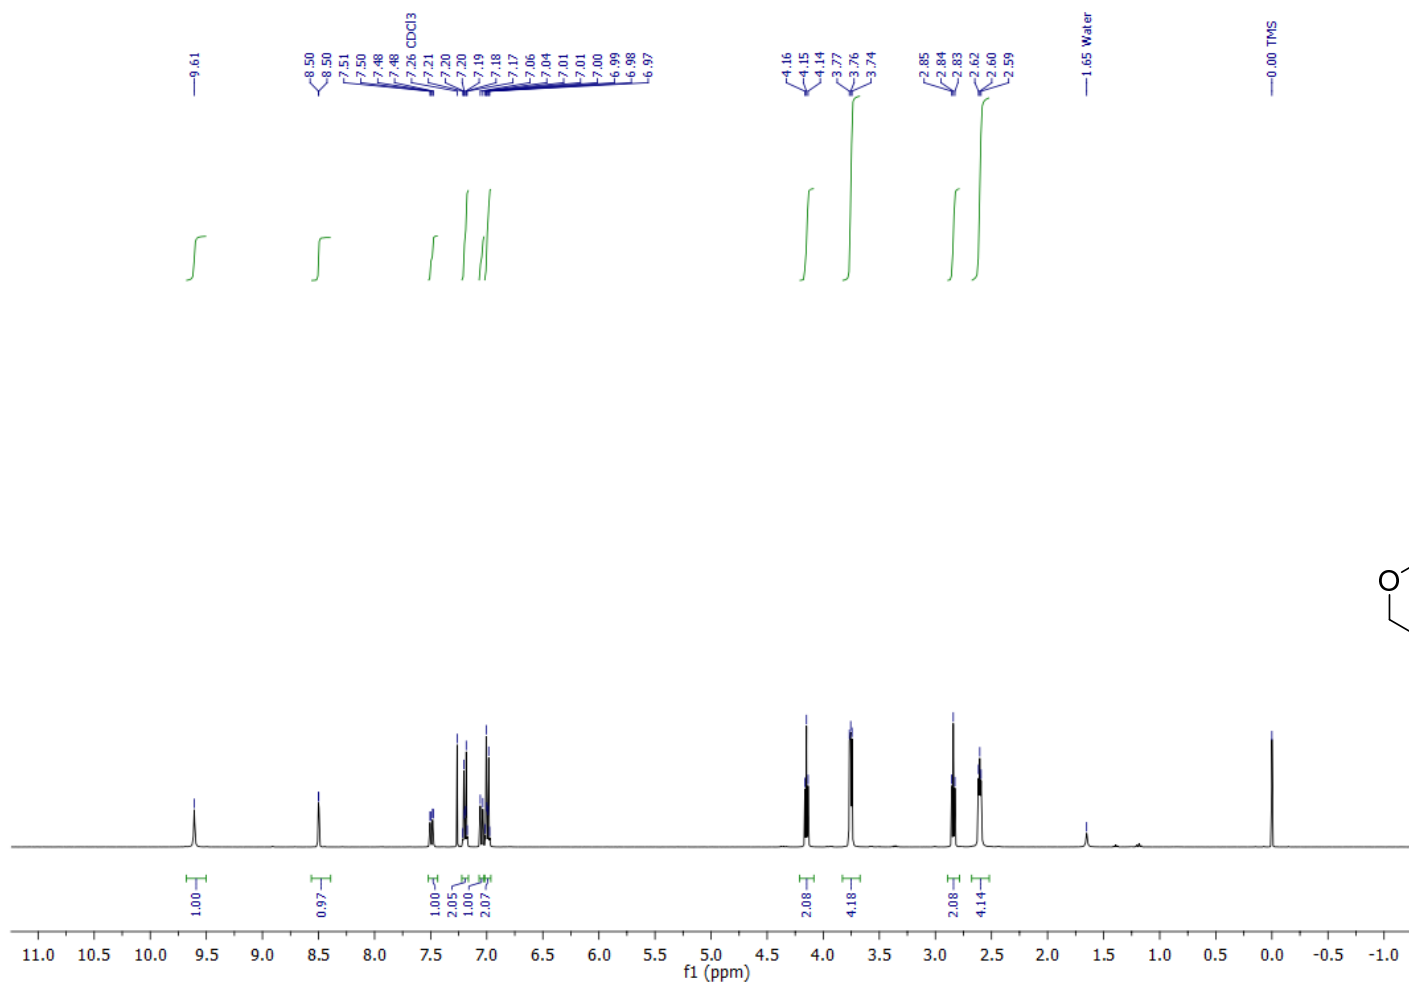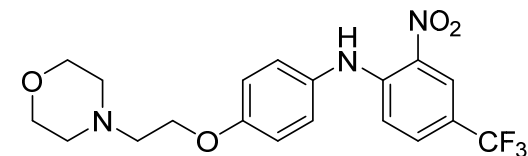



$^{13}\text{C}$  NMR (101 MHz,  $\text{CDCl}_3$ )  $\delta$  157.90, 146.45, 131.84 (q,  $J = 3.0$  Hz), 131.47, 130.32, 127.56, 124.88 (q,  $J = 4.5$  Hz), 123.60 (q,  $J = 271.2$  Hz), 118.96 (q,  $J = 34.4$  Hz), 116.62, 116.03, 67.08, 66.34, 57.73, 54.27; HRMS (ESI $^+$ ) for  $\text{C}_{19}\text{H}_{21}\text{F}_3\text{N}_3\text{O}_4$  ( $[\text{M}+\text{H}]^+$ ) calculated 412.1479 found 412.1473

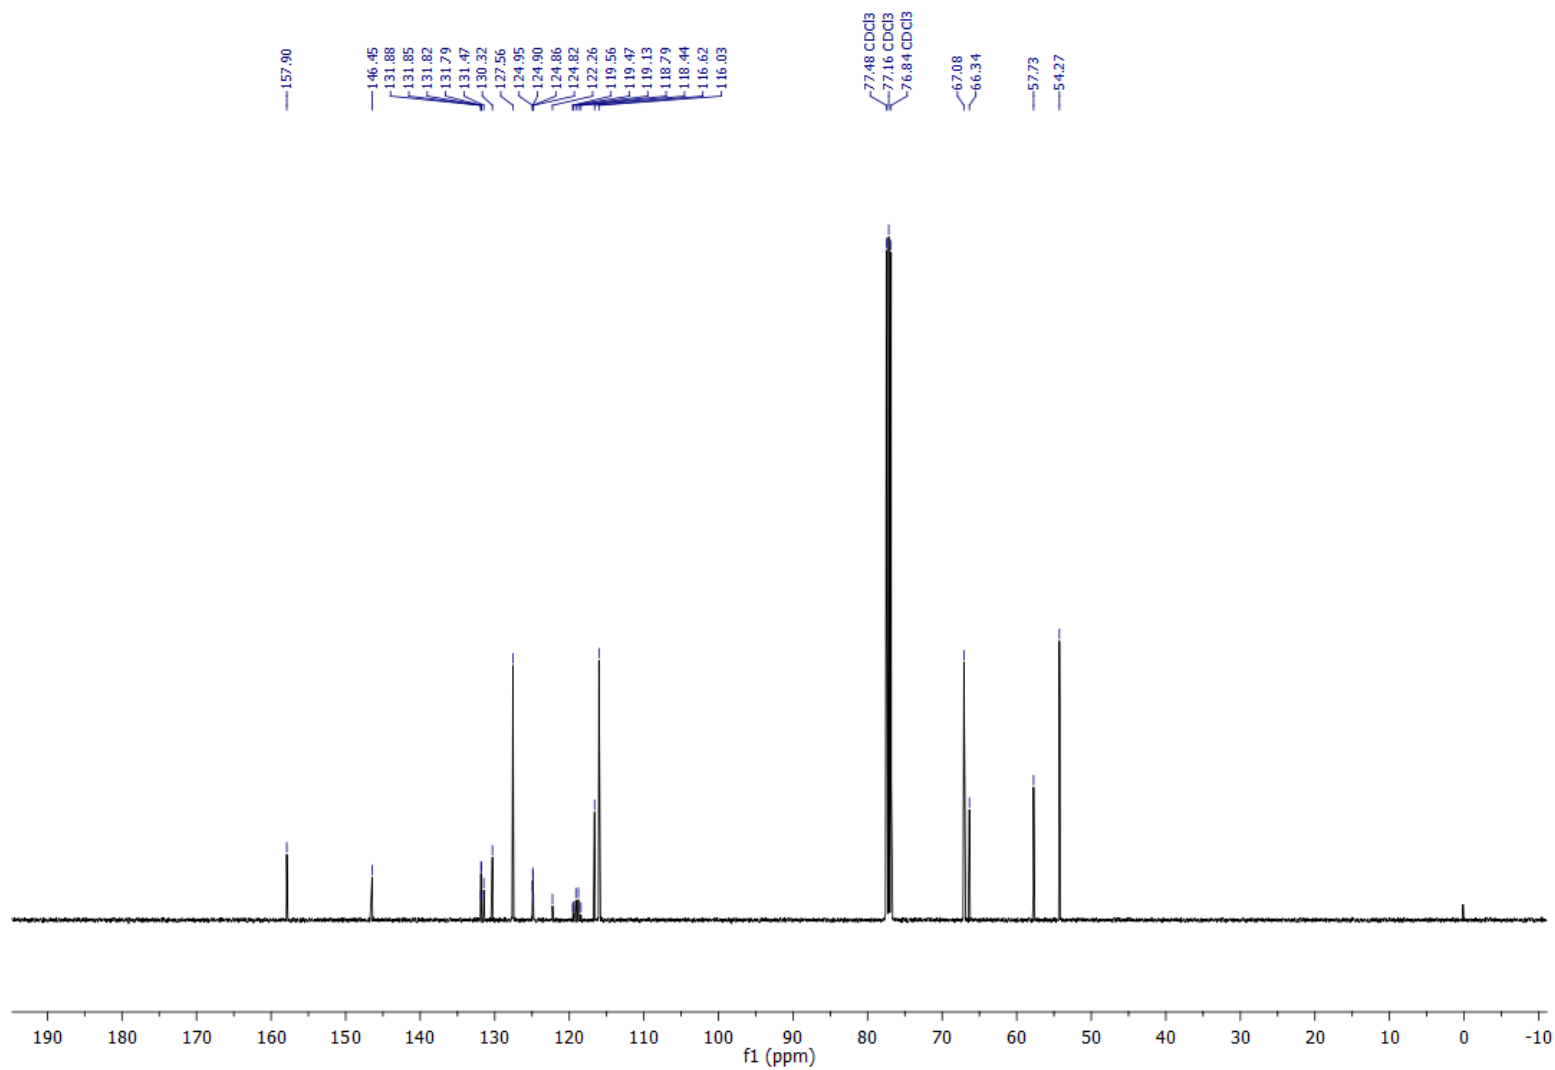

**N-(4-(benzyloxy)phenyl)-2-nitro-4-(trifluoromethyl)aniline (14)**

$^1\text{H}$  NMR (400 MHz,  $\text{CDCl}_3$ )  $\delta$  9.61 (s, 1H), 8.50 (s, 1H), 7.53 – 7.32 (m, 6H), 7.19 (d,  $J = 8.8$  Hz, 2H), 7.06 (d,  $J = 8.9$  Hz, 3H), 5.11 (s, 2H)

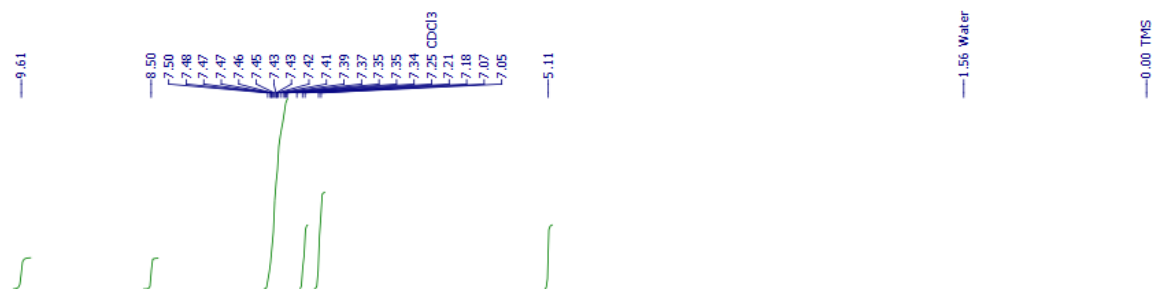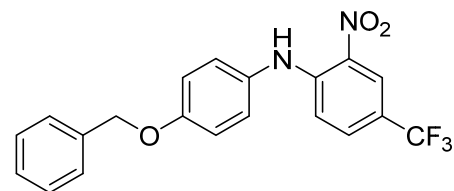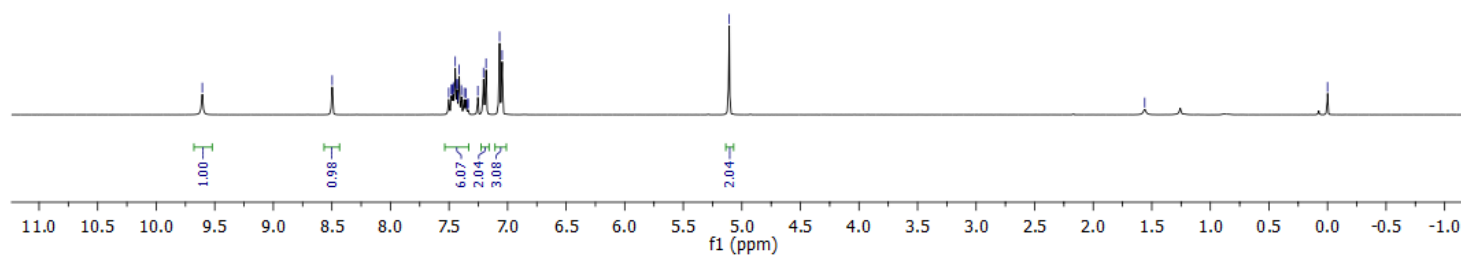

$^{13}\text{C}$  NMR (101 MHz,  $\text{CDCl}_3$ )  $\delta$  157.92, 146.43, 136.65, 131.83 (q,  $J = 3.0$  Hz), 131.47, 130.38, 128.84, 128.34, 127.63, 127.56, 124.87 (q,  $J = 4.3$  Hz), 123.65 (q,  $J = 268.0$  Hz), 118.95 (q,  $J = 34.4$  Hz), 116.65, 116.33, 70.50; HRMS (ESI $^-$ ) for  $\text{C}_{20}\text{H}_{14}\text{F}_3\text{N}_2\text{O}_3$  ( $[\text{M}]^-$ ) calculated 387.0962 found 387.0964

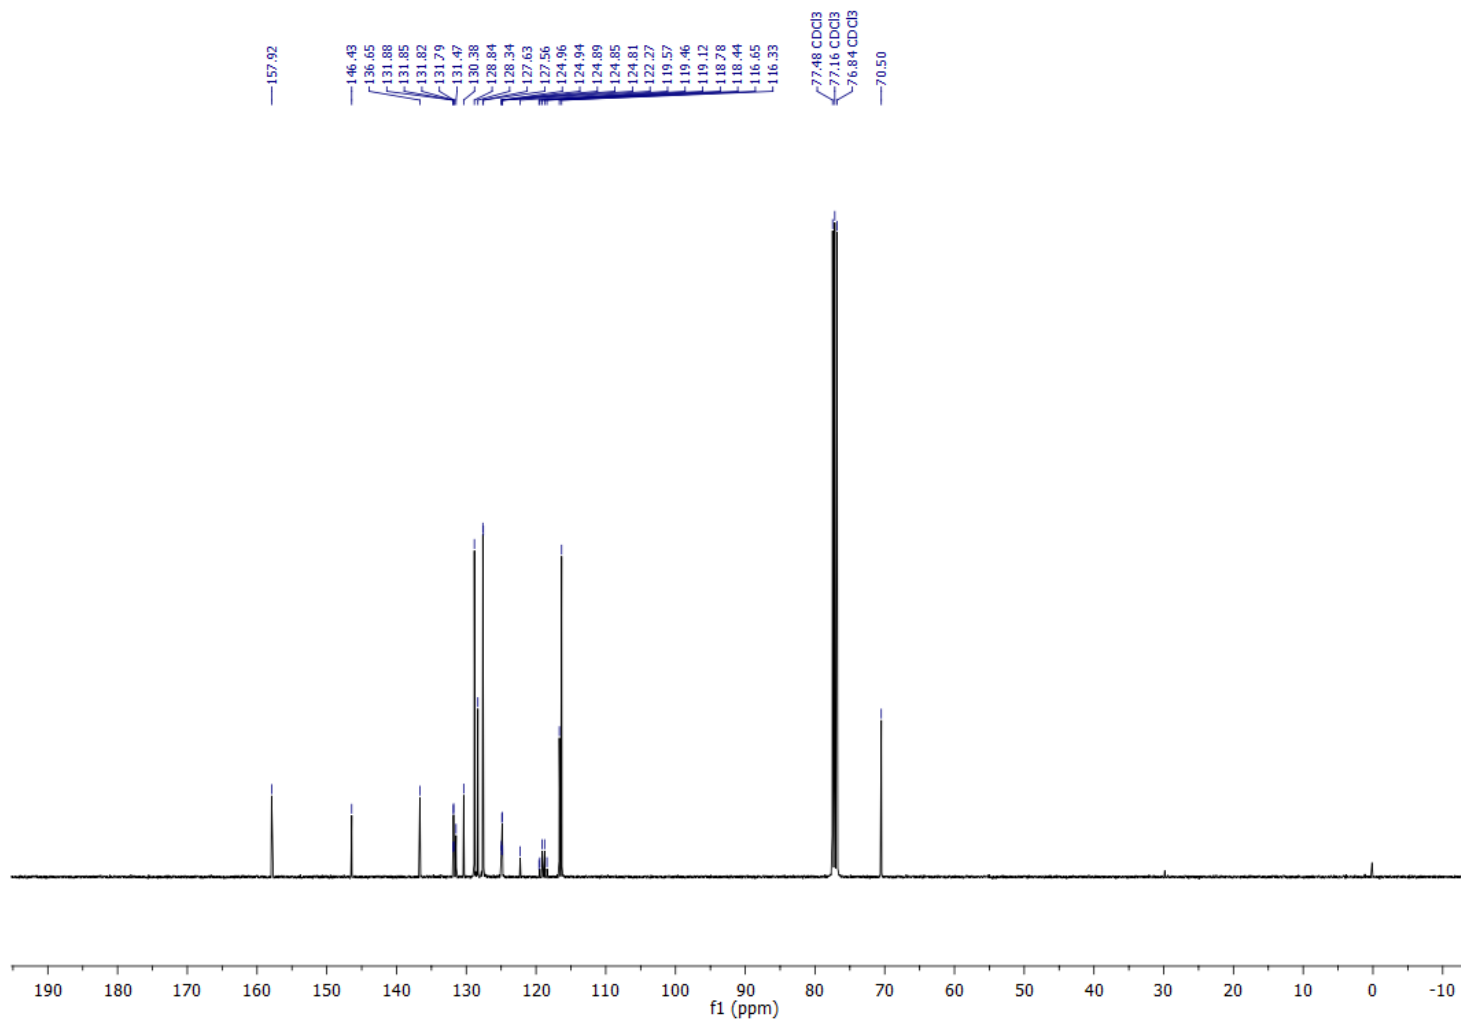

**1-(Methylamino)-3-(4-((2-nitro-4-(trifluoromethyl)phenyl)amino)phenoxy)propan-2-ol (15)**

$^1\text{H}$  NMR (400 MHz, DMSO)  $\delta$  9.73 (s, 1H), 8.35 (d,  $J = 1.3$  Hz, 1H), 7.72 (dd,  $J_1 = 9.2$  Hz,  $J_2 = 2.2$  Hz, 1H), 7.35 – 7.20 (m, 2H), 7.10 – 6.95 (m, 3H), 3.99 (q,  $J = 7.0$  Hz, 1H), 3.91 (t,  $J = 5.9$  Hz, 2H), 2.69 – 2.51 (m, 2H), 2.31 (s, 3H)

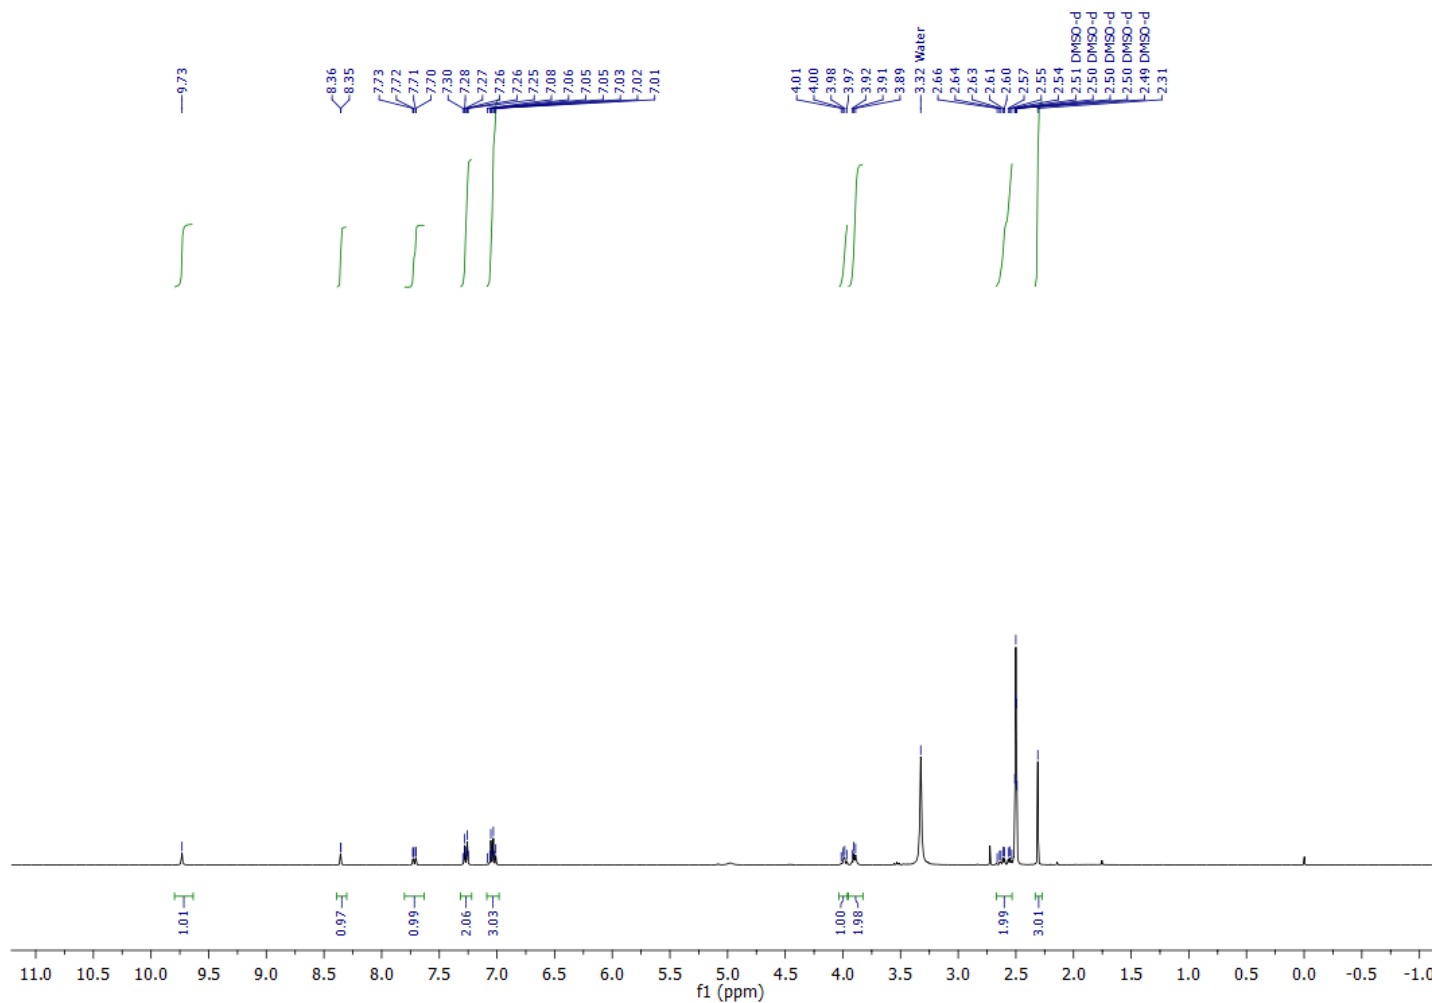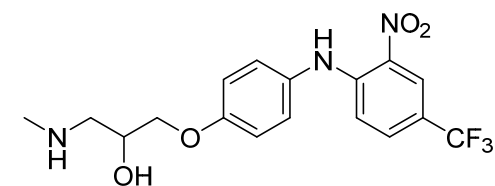

$^{13}\text{C}$  NMR (101 MHz,  $\text{CDCl}_3$ )  $\delta$  157.84, 146.41, 131.85 (q,  $J = 2.9$  Hz), 131.46, 130.46, 127.56, 124.86 (q,  $J = 4.9$  Hz), 123.54 (q,  $J = 270.0$  Hz), 118.95 (q,  $J = 34.4$  Hz), 116.61, 116.01, 73.35, 70.99, 68.10, 63.07, 53.98, 47.99, 36.48, 31.09; HRMS (ESI $^+$ ) for  $\text{C}_{17}\text{H}_{19}\text{F}_3\text{N}_3\text{O}_4$  ( $[\text{M}+\text{H}]^+$ ) calculated 386.1322 found 386.1318

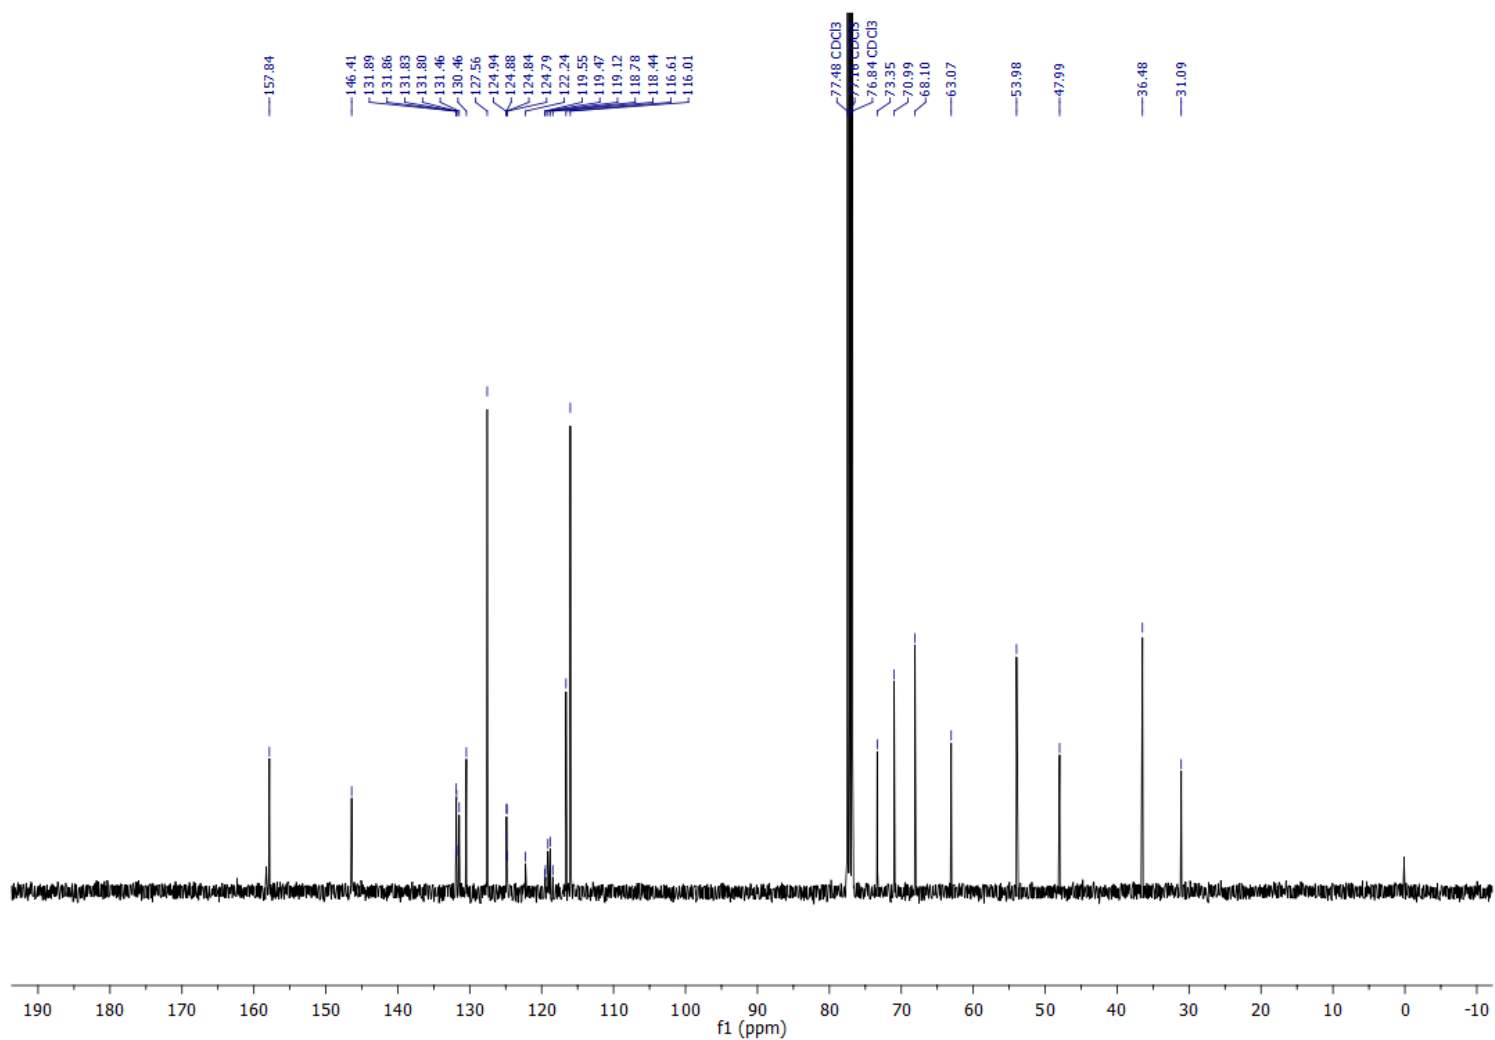

**4-((3,4-Dichlorophenoxy)methyl)-1-(2-hydroxy-3-(4-((2-nitro-4-(trifluoromethyl)phenyl)amino)phenoxy)propyl)piperidin-4-ol (16a)**

$^1\text{H}$  NMR (400 MHz,  $\text{CDCl}_3$ )  $\delta$  9.61 (s, 1H), 8.49 (d,  $J = 1.0$  Hz, 1H), 7.49 (dd,  $J_1 = 9.1$  Hz,  $J_2 = 2.0$  Hz, 1H), 7.34 (d,  $J = 8.9$  Hz, 1H), 7.19 (t,  $J = 5.9$  Hz, 2H), 7.11 – 6.95 (m, 4H), 6.79 (dd,  $J_1 = 8.9$  Hz,  $J_2 = 2.9$  Hz, 1H), 4.16 (td,  $J_1 = 9.3$  Hz,  $J_2 = 4.8$  Hz, 1H), 4.09 – 3.97 (m, 2H), 3.81 (s, 2H), 2.87 (d,  $J = 11.3$  Hz, 1H), 2.83 – 2.57 (m, 4H), 2.51 (td,  $J_1 = 11.3$  Hz,  $J_2 = 3.0$  Hz, 1H), 1.92 – 1.66 (m, 4H)

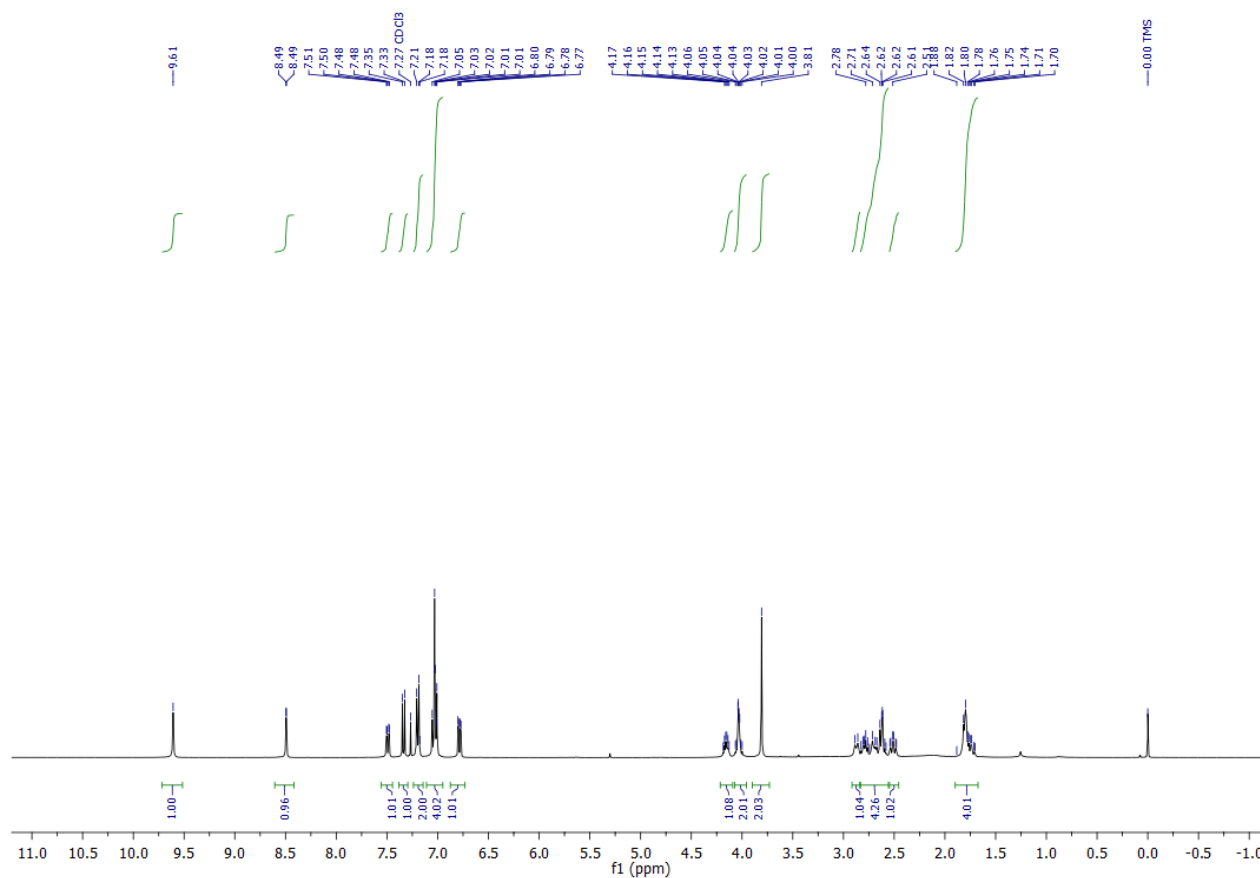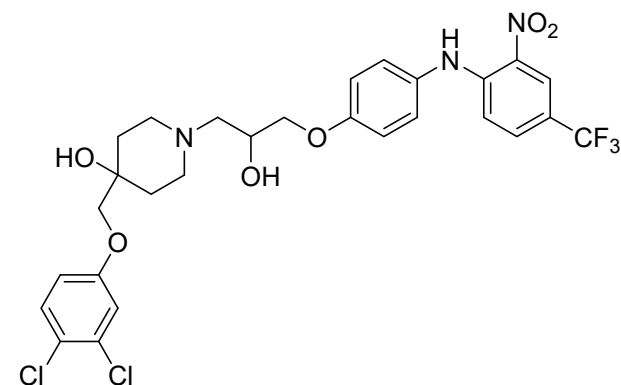

$^{13}\text{C}$  NMR (101 MHz,  $\text{CDCl}_3$ )  $\delta$  157.90, 157.71, 146.39, 133.09, 131.82 (q,  $J = 3.0$  Hz), 131.42, 130.90, 130.41, 127.51, 124.82 (q,  $J = 4.2$  Hz), 124.69, 123.58 (q,  $J = 271.0$  Hz), 118.90 (q,  $J = 34.4$  Hz), 116.62, 116.60, 116.00, 114.67, 76.24, 70.79, 68.80, 65.64, 60.50, 50.41, 47.90, 34.21, 34.00; HRMS (ESI $^+$ ) for  $\text{C}_{28}\text{H}_{29}\text{Cl}_2\text{F}_3\text{N}_3\text{O}_6$  ( $[\text{M}+\text{H}]^+$ ) calculated 630.1380 found 630.1365

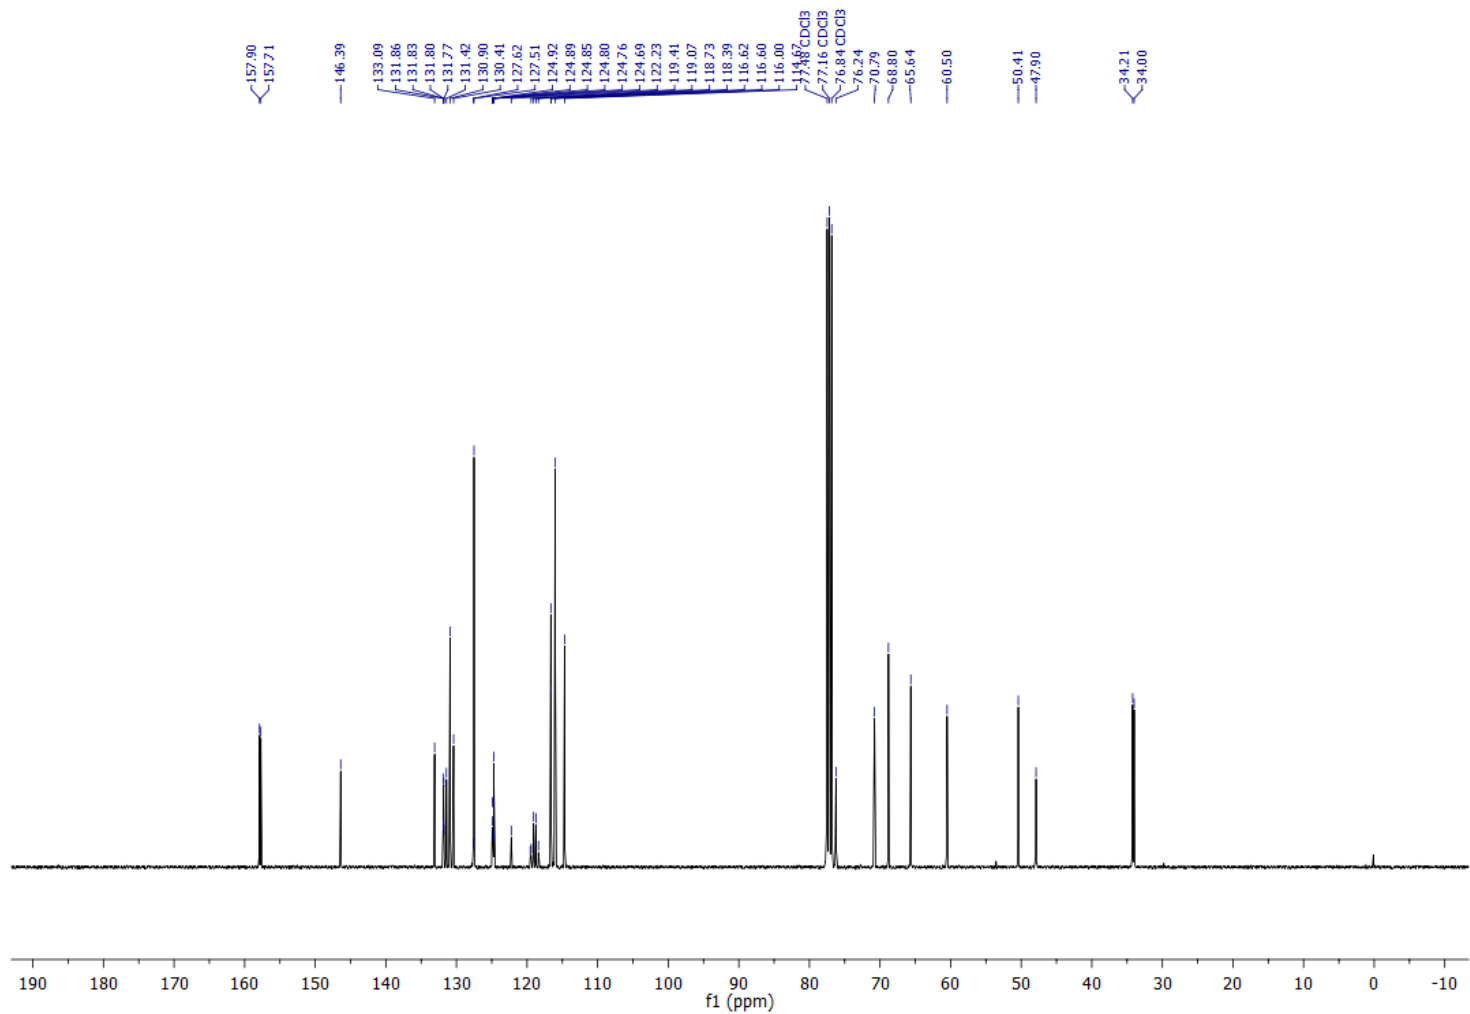

**1-(2-Hydroxy-3-(4-((2-nitro-4-(trifluoromethyl)phenyl)amino)phenoxy)propyl)-4-((4-methoxyphenoxy)methyl)piperidin-4-ol (16b)**

$^1\text{H}$  NMR (400 MHz,  $\text{CDCl}_3$ )  $\delta$  9.60 (s, 1H), 8.49 (d,  $J = 1.1$  Hz, 1H), 7.49 (dd,  $J_1 = 9.1$  Hz,  $J_2 = 2.1$  Hz, 1H), 7.18 (t,  $J = 6.0$  Hz, 2H), 7.08 – 6.96 (m, 3H), 6.92 – 6.77 (m, 4H), 4.23 – 4.12 (m, 1H), 4.10 – 3.97 (m, 2H), 3.78 (s, 2H), 3.77 (s, 3H), 2.91 – 2.75 (m, 2H), 2.74 – 2.57 (m, 3H), 2.52 (td,  $J_1 = 11.3$  Hz,  $J_2 = 2.9$  Hz, 1H), 1.88 – 1.67 (m, 4H)

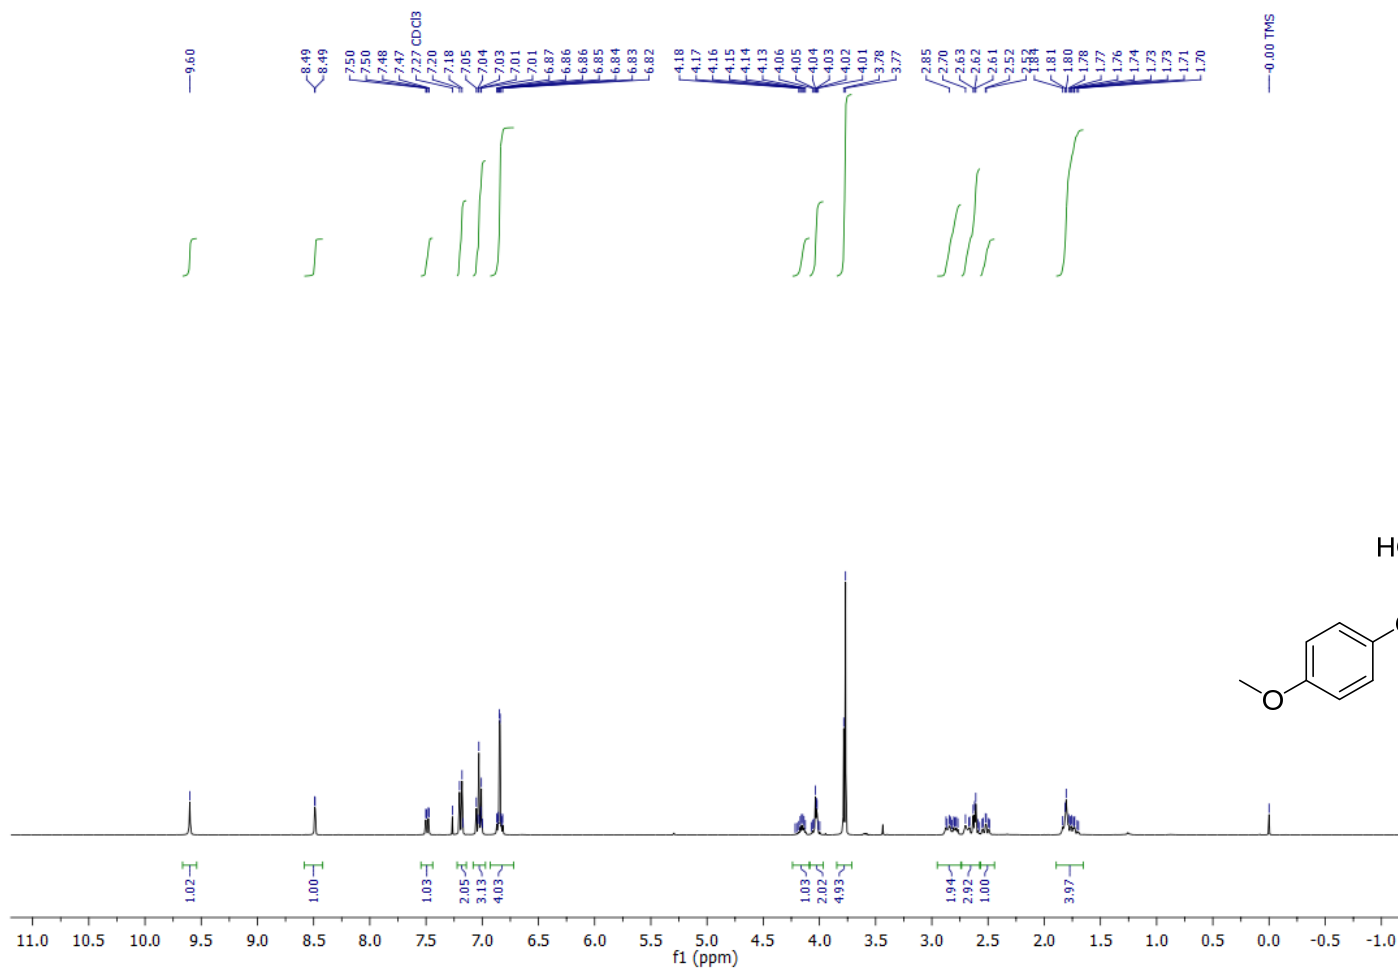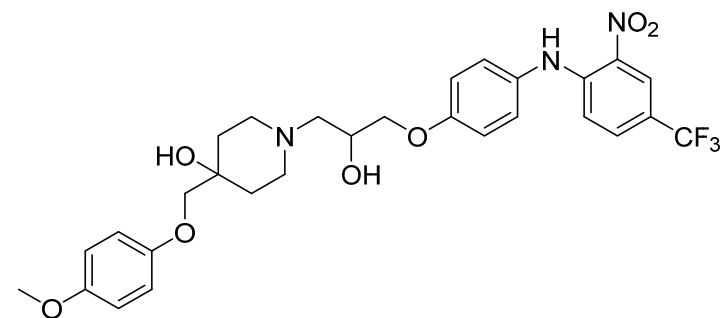



$^{13}\text{C}$  NMR (101 MHz,  $\text{CDCl}_3$ )  $\delta$  157.92, 154.30, 152.87, 146.40, 131.80 (q,  $J = 2.9$  Hz), 131.41, 130.37, 127.50, 124.81 (q,  $J = 4.2$  Hz), 123.58 (q,  $J = 270.9$  Hz), 118.87 (q,  $J = 34.3$  Hz), 116.60, 116.00, 115.68, 114.81, 76.43, 70.82, 68.85, 65.60, 60.52, 55.83, 50.55, 48.06, 34.29, 34.08; HRMS (ESI $^+$ ) for  $\text{C}_{29}\text{H}_{33}\text{F}_3\text{N}_3\text{O}_7$  ( $[\text{M}+\text{H}]^+$ ) calculated 592.2265 found 592.2251

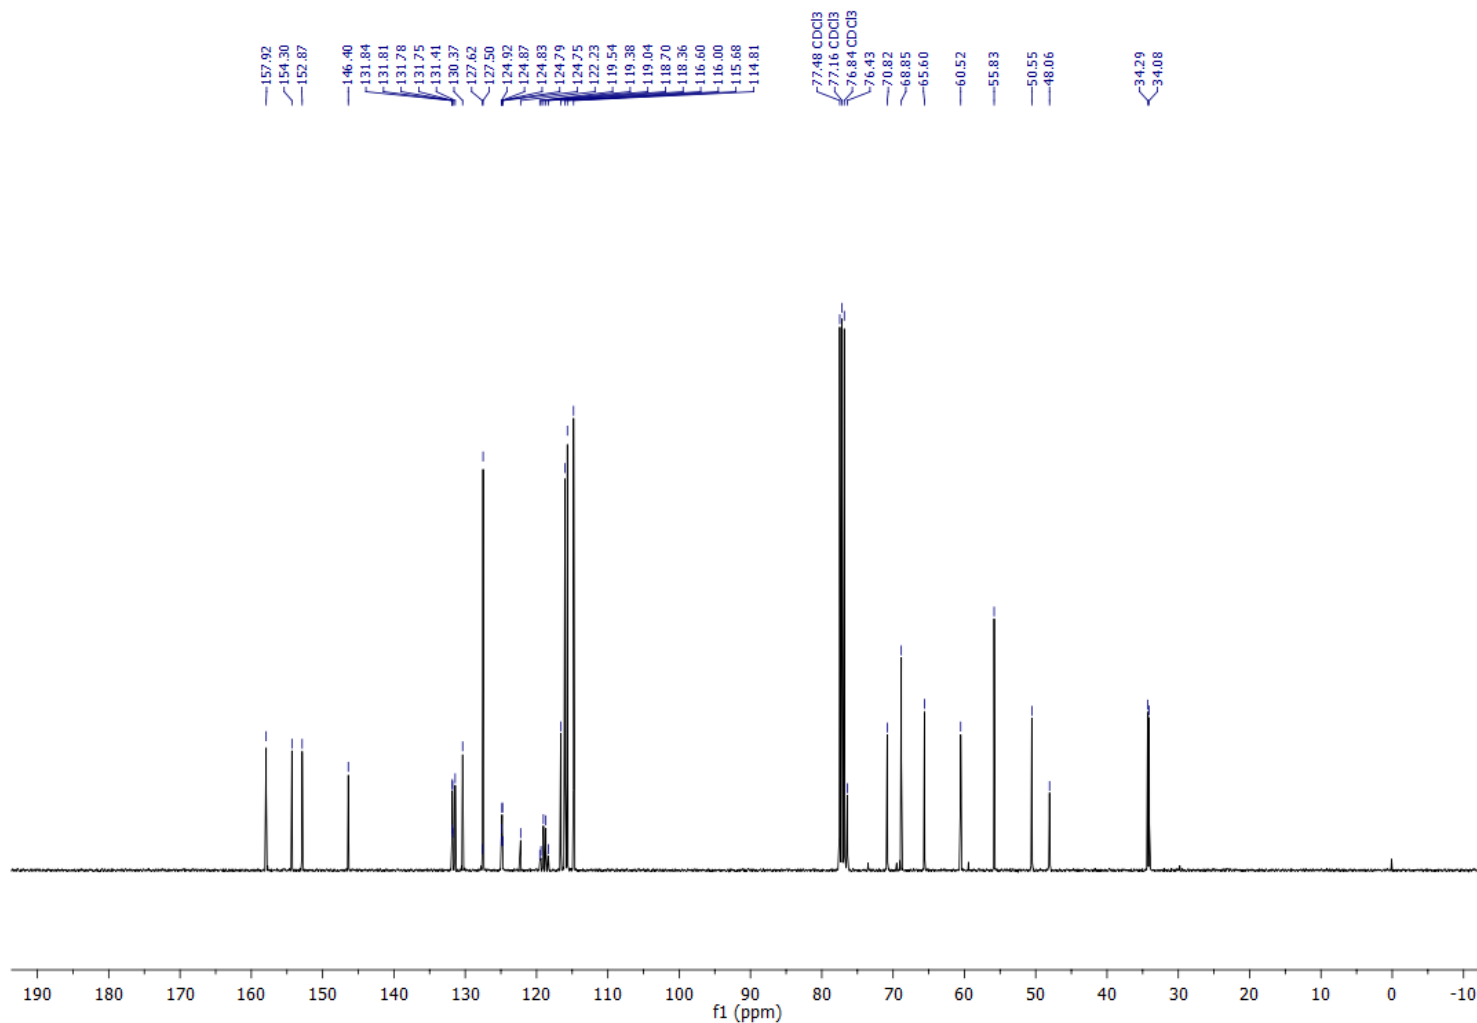

**3,4-Dichloro-N-(1-(2-hydroxy-3-(4-((2-nitro-4-(trifluoromethyl)phenyl)amino)phenoxy)propyl)piperidin-4-yl)benzamide (16c)**

$^1\text{H}$  NMR (400 MHz,  $\text{CDCl}_3$ )  $\delta$  9.60 (s, 1H), 8.50 (d,  $J = 1.1$  Hz, 1H), 7.85 (d,  $J = 2.0$  Hz, 1H), 7.59 (dd,  $J_1 = 8.3$  Hz,  $J_2 = 2.0$  Hz, 1H), 7.54 – 7.46 (m, 2H), 7.24 – 7.16 (m, 2H), 7.08 – 6.96 (m, 3H), 6.07 (d,  $J = 7.7$  Hz, 1H), 4.13 (td,  $J_1 = 9.3$  Hz,  $J_2 = 4.4$  Hz, 1H), 4.09 – 3.96 (m, 3H), 3.07 (d,  $J = 11.6$  Hz, 1H), 2.90 (d,  $J = 11.7$  Hz, 1H), 2.70 – 2.48 (m, 3H), 2.29 – 2.19 (m, 1H), 2.09 (d,  $J = 11.2$  Hz, 2H), 1.72 – 1.50 (m, 2H)

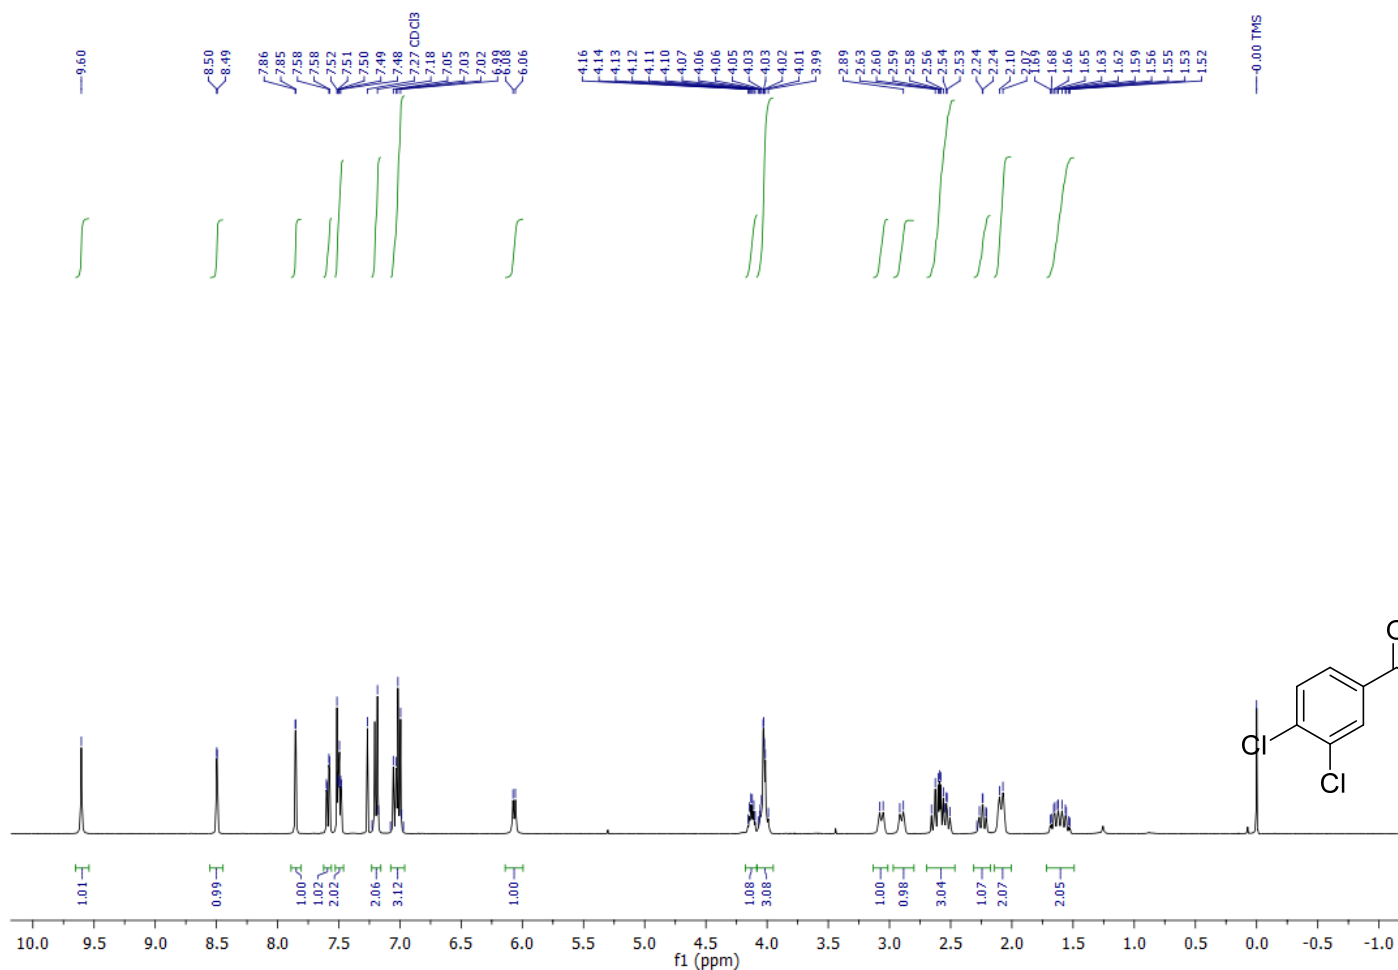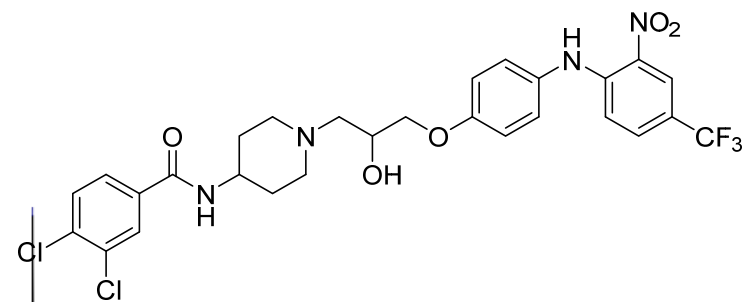

$^{13}\text{C}$  NMR (101 MHz,  $\text{CDCl}_3$ )  $\delta$  164.84, 157.85, 146.40, 136.06, 134.53, 133.21, 131.85 (q,  $J = 2.9$  Hz), 131.47, 130.77, 130.47, 129.25, 127.54, 126.21, 124.87 (q,  $J = 4.6$  Hz), 123.59 (q,  $J = 271.1$  Hz), 118.97 (q,  $J = 34.4$  Hz), 116.60, 115.99, 70.67, 65.74, 60.36, 54.15, 51.34, 47.40, 32.63, 32.33; HRMS (ESI $^+$ ) for  $\text{C}_{28}\text{H}_{28}\text{Cl}_2\text{F}_3\text{N}_4\text{O}_5$  ( $[\text{M}+\text{H}]^+$ ) calculated 627.1383 found 627.1369

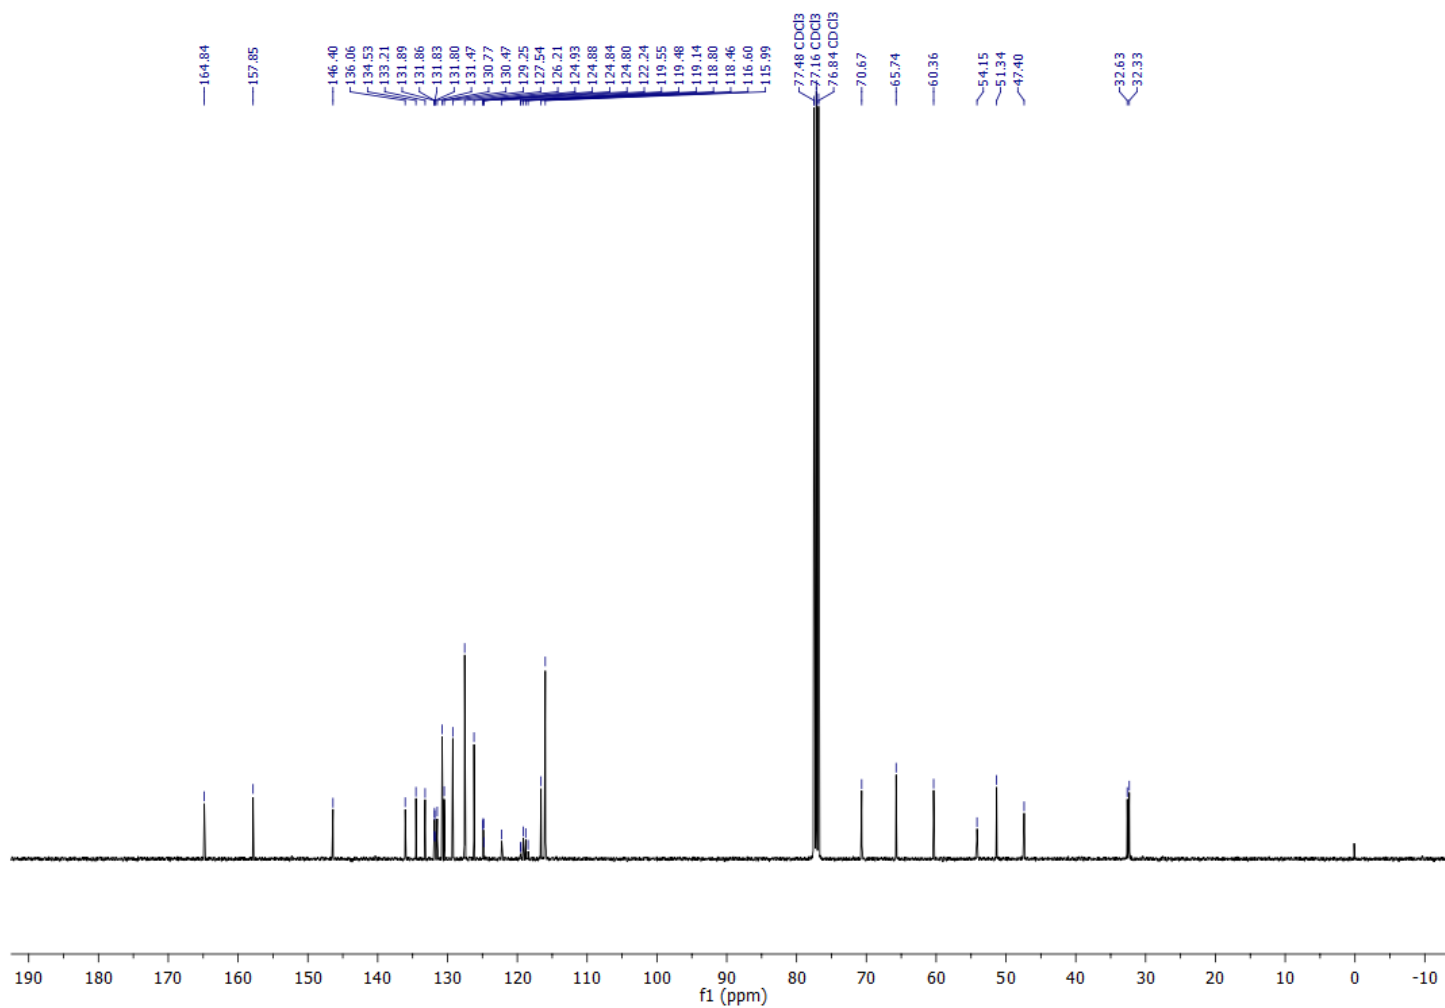

**2-(3,4-Dichlorophenyl)-N-(1-(2-hydroxy-3-(4-((2-nitro-4-(trifluoromethyl)phenyl)amino)phenoxy)propyl)piperidin-4-yl)acetamide (16d)**

$^1\text{H}$  NMR (400 MHz, DMSO)  $\delta$  9.74 (s, 1H), 8.35 (d,  $J$  = 1.3 Hz, 1H), 8.04 (d,  $J$  = 7.6 Hz, 1H), 7.72 (dd,  $J_1$  = 9.2 Hz,  $J_2$  = 2.2 Hz, 1H), 7.55 (d,  $J$  = 8.2 Hz, 1H), 7.50 (d,  $J$  = 2.0 Hz, 1H), 7.31 – 7.25 (m, 2H), 7.22 (dd,  $J_1$  = 8.3 Hz,  $J_2$  = 2.0 Hz, 1H), 7.13 – 6.98 (m, 3H), 4.87 (d,  $J$  = 4.2 Hz, 1H), 4.01 (dd,  $J$  = 9.2, 3.1 Hz, 1H), 3.98 – 3.85 (m, 1H), 3.56 – 3.44 (m, 1H), 3.41 (s, 1H), 2.91 – 2.77 (m, 1H), 2.40 (ddd,  $J$  = 33.4, 12.7, 5.9 Hz, 1H), 2.08 (dd,  $J$  = 19.9, 9.4 Hz, 1H), 1.76 – 1.63 (m, 1H), 1.39 (dd,  $J$  = 21.8, 10.8 Hz, 1H)

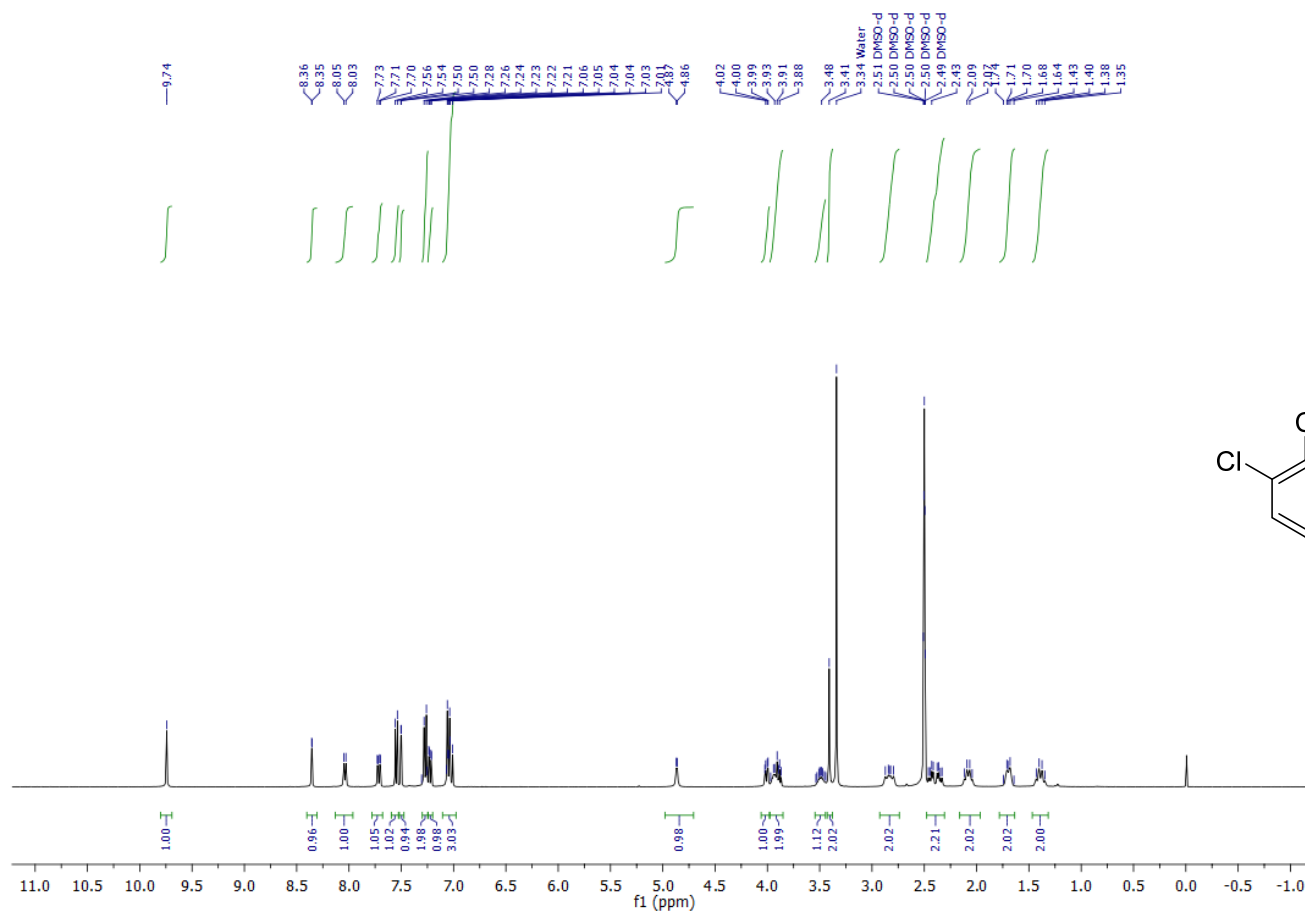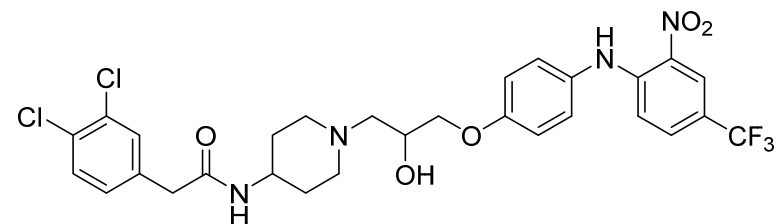

$^{13}\text{C}$  NMR (101 MHz,  $\text{CDCl}_3$ )  $\delta$  169.14, 157.87, 146.40, 135.13, 132.98, 131.84 (q,  $J = 2.9$  Hz), 131.68, 131.45, 131.31, 130.91, 130.44, 128.74, 127.54, 124.86 (q,  $J = 4.7$  Hz), 123.55 (q,  $J = 277.7$  Hz), 118.96 (q,  $J = 34.5$  Hz), 116.60, 116.00, 70.69, 65.69, 60.32, 54.02, 51.25, 46.90, 42.85, 32.50, 32.21; HRMS (ESI $^+$ ) for  $\text{C}_{29}\text{H}_{29}\text{Cl}_2\text{F}_3\text{N}_4\text{O}_5$  ( $[\text{M}+\text{H}]^+$ ) calculated 641.1540 found 641.1524

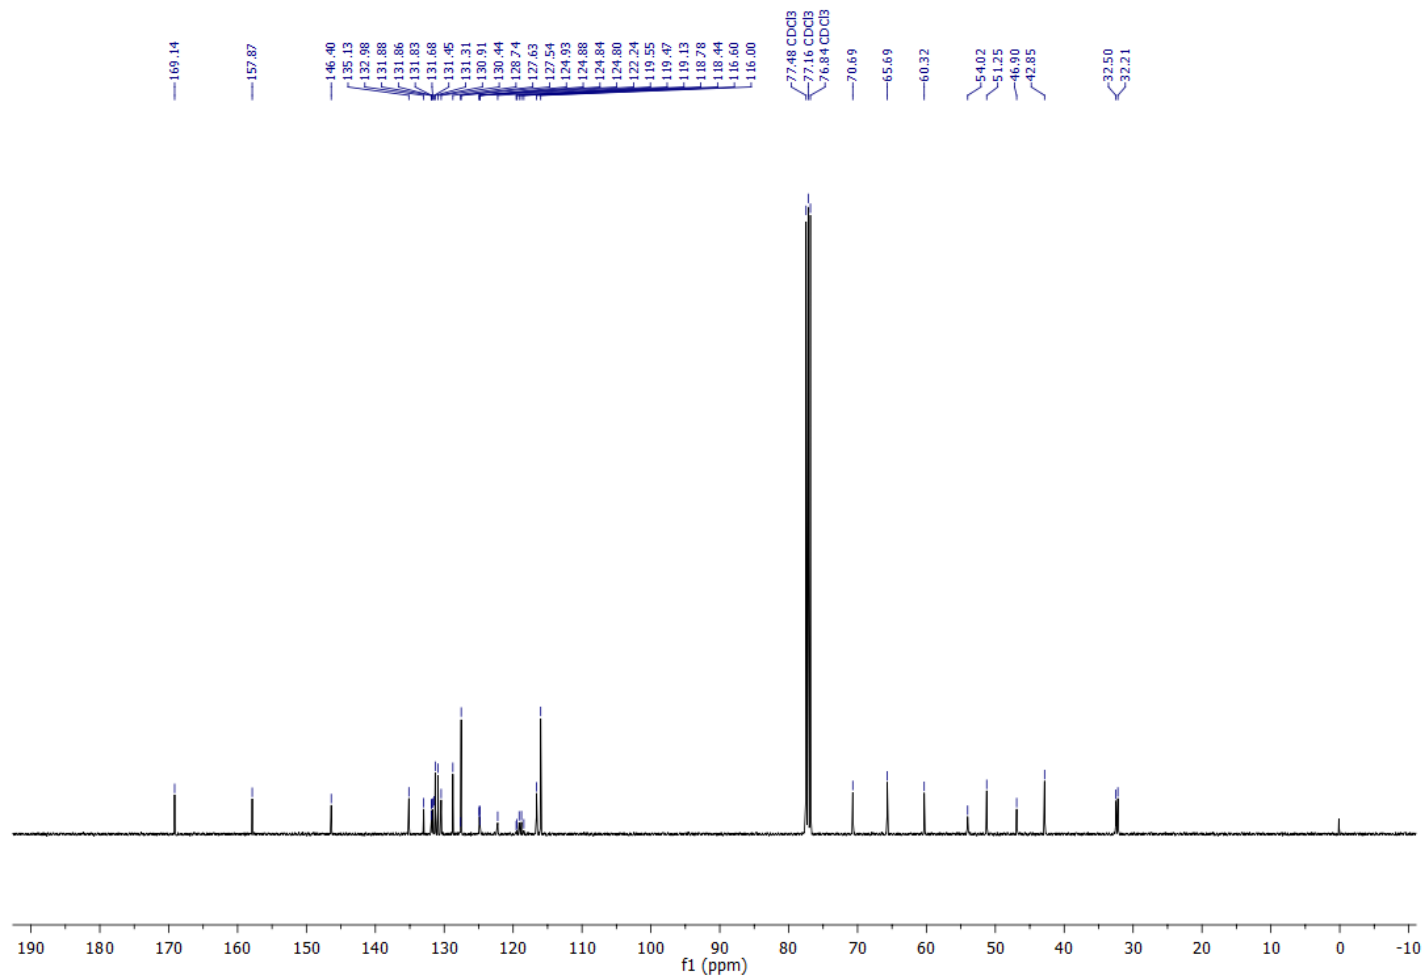

***N*-(4-(2-(Diethylamino)ethoxy)phenyl)-2-nitro-4-(trifluoromethyl)aniline (17a)**

$^1\text{H}$  NMR (400 MHz,  $\text{CDCl}_3$ )  $\delta$  9.60 (s, 1H), 8.49 (d,  $J = 1.3$  Hz, 1H), 7.48 (dd,  $J_1 = 9.1$  Hz,  $J_2 = 2.1$  Hz, 1H), 7.20 – 7.14 (m, 2H), 7.04 (d,  $J = 9.1$  Hz, 1H), 7.01 – 6.95 (m, 2H), 4.07 (t,  $J = 6.3$  Hz, 2H), 2.90 (t,  $J = 6.3$  Hz, 2H), 2.66 (q,  $J = 7.1$  Hz, 4H), 1.09 (t,  $J = 7.1$  Hz, 6H)

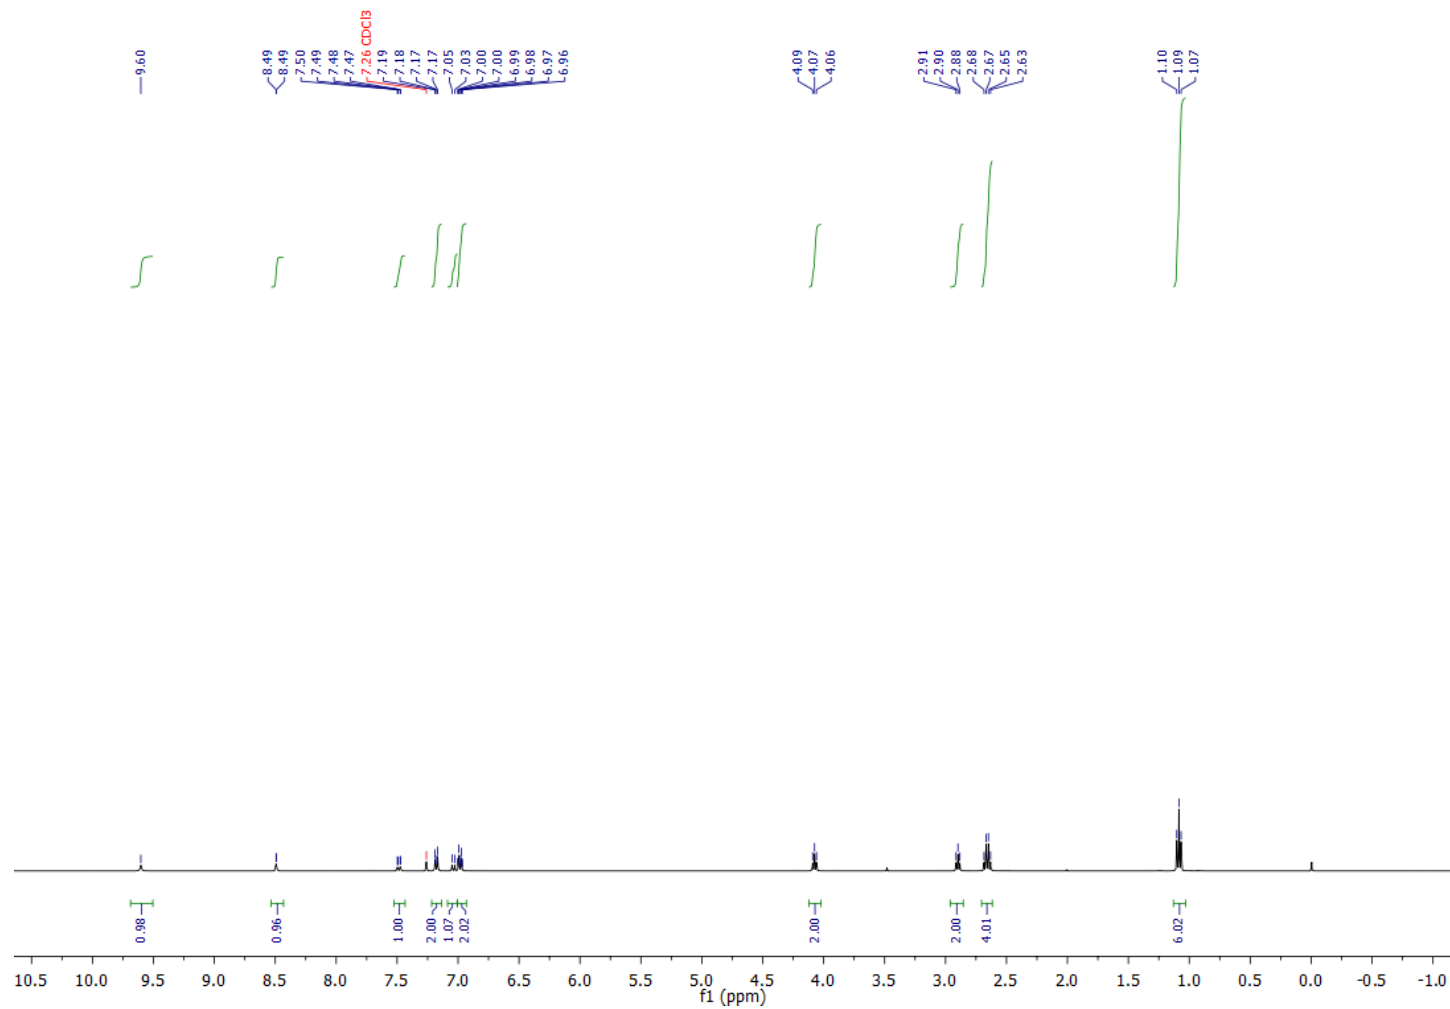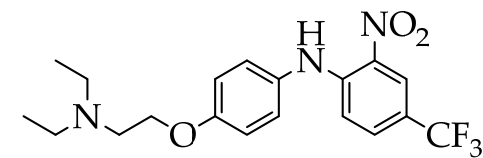

$^{13}\text{C}$  NMR (101 MHz,  $\text{CDCl}_3$ )  $\delta$  158.11, 146.52, 131.82 (q,  $J = 3.0$  Hz), 131.41, 130.06, 127.54, 124.86 (q,  $J = 4.3$  Hz), 123.62 (q,  $J = 270.8$  Hz), 118.87 (q,  $J = 34.4$  Hz), 116.65, 115.96, 67.20, 51.87, 48.05, 12.01; HRMS (ESI $^+$ ) for  $\text{C}_{19}\text{H}_{22}\text{F}_3\text{N}_3\text{O}_3$  ( $[\text{M}+\text{H}]^+$ ) calculated 398.1686 found 398.1682

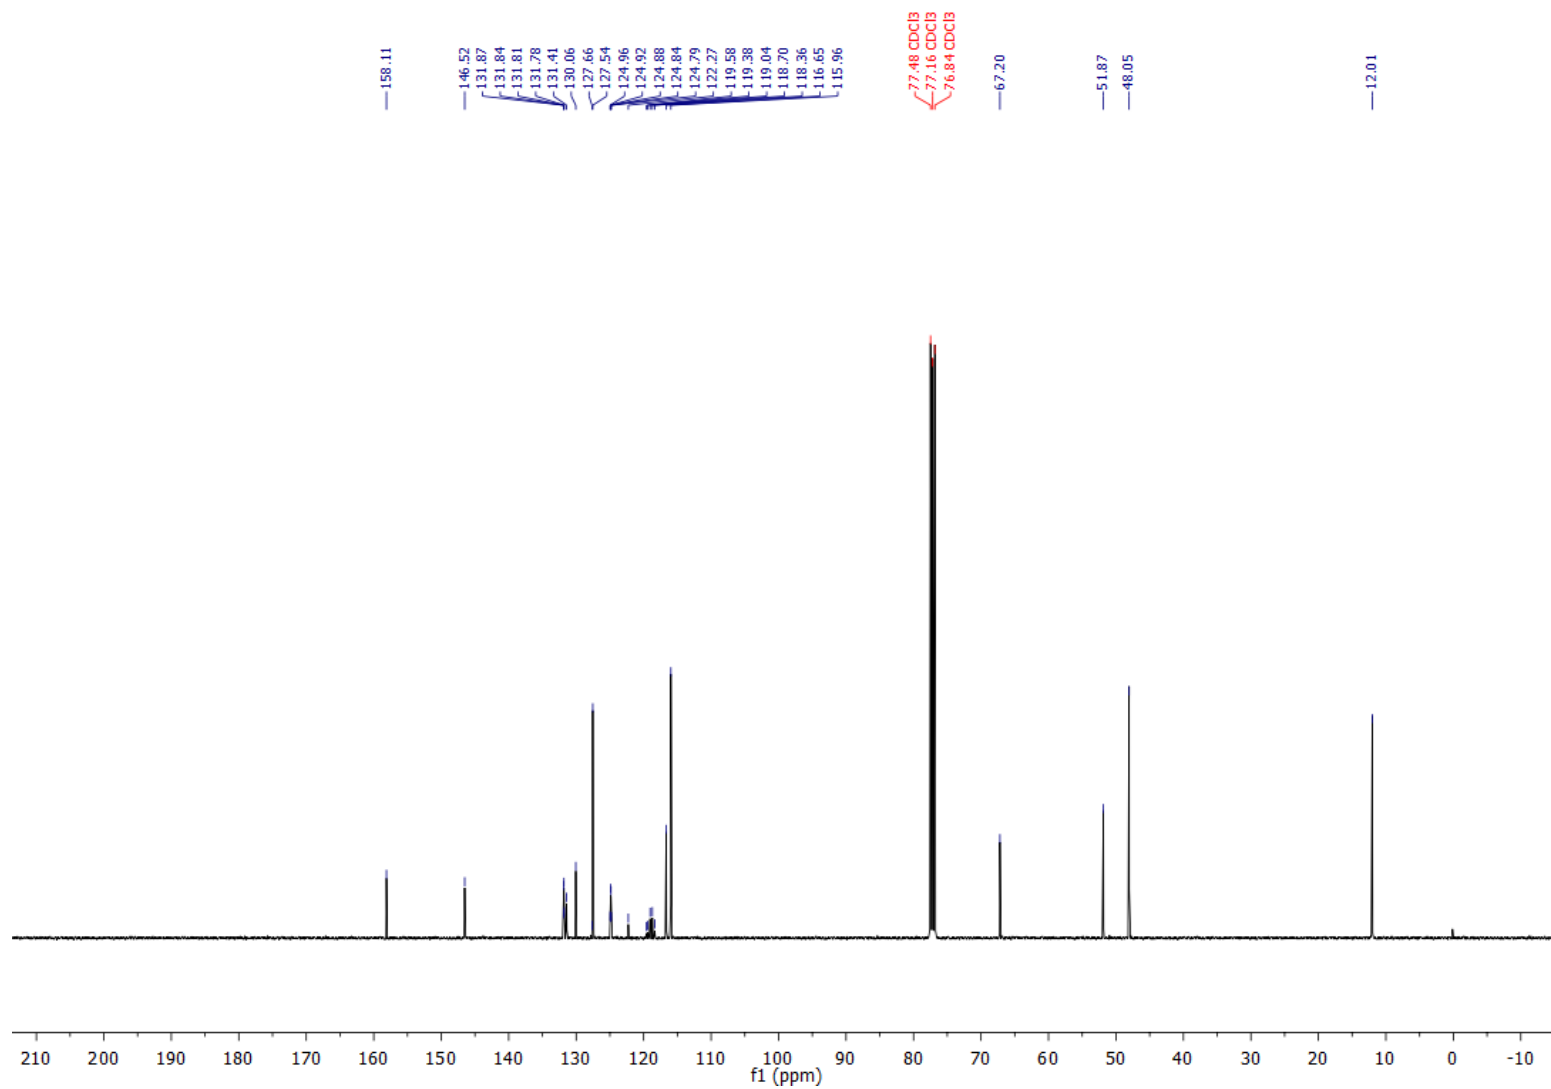

**3,5-Dibromo-4-(2-(diethylamino)ethoxy)-N-(2-nitro-4-(trifluoromethyl)phenyl)aniline (17b)**

$^1\text{H}$  NMR (400 MHz,  $\text{CDCl}_3$ )  $\delta$  9.53 (s, 1H), 8.49 (d,  $J = 1.4$  Hz, 1H), 7.63 (dd,  $J_1 = 9.0$  Hz,  $J_2 = 2.0$  Hz, 1H), 7.48 (s, 2H), 7.21 (d,  $J = 9.0$  Hz, 1H), 4.37 (t,  $J = 5.0$  Hz, 2H), 3.54 (t,  $J = 9.2$  Hz, 2H), 3.29 (q,  $J = 6.8$  Hz, 4H), 1.36 (t,  $J = 7.2$  Hz, 6H)

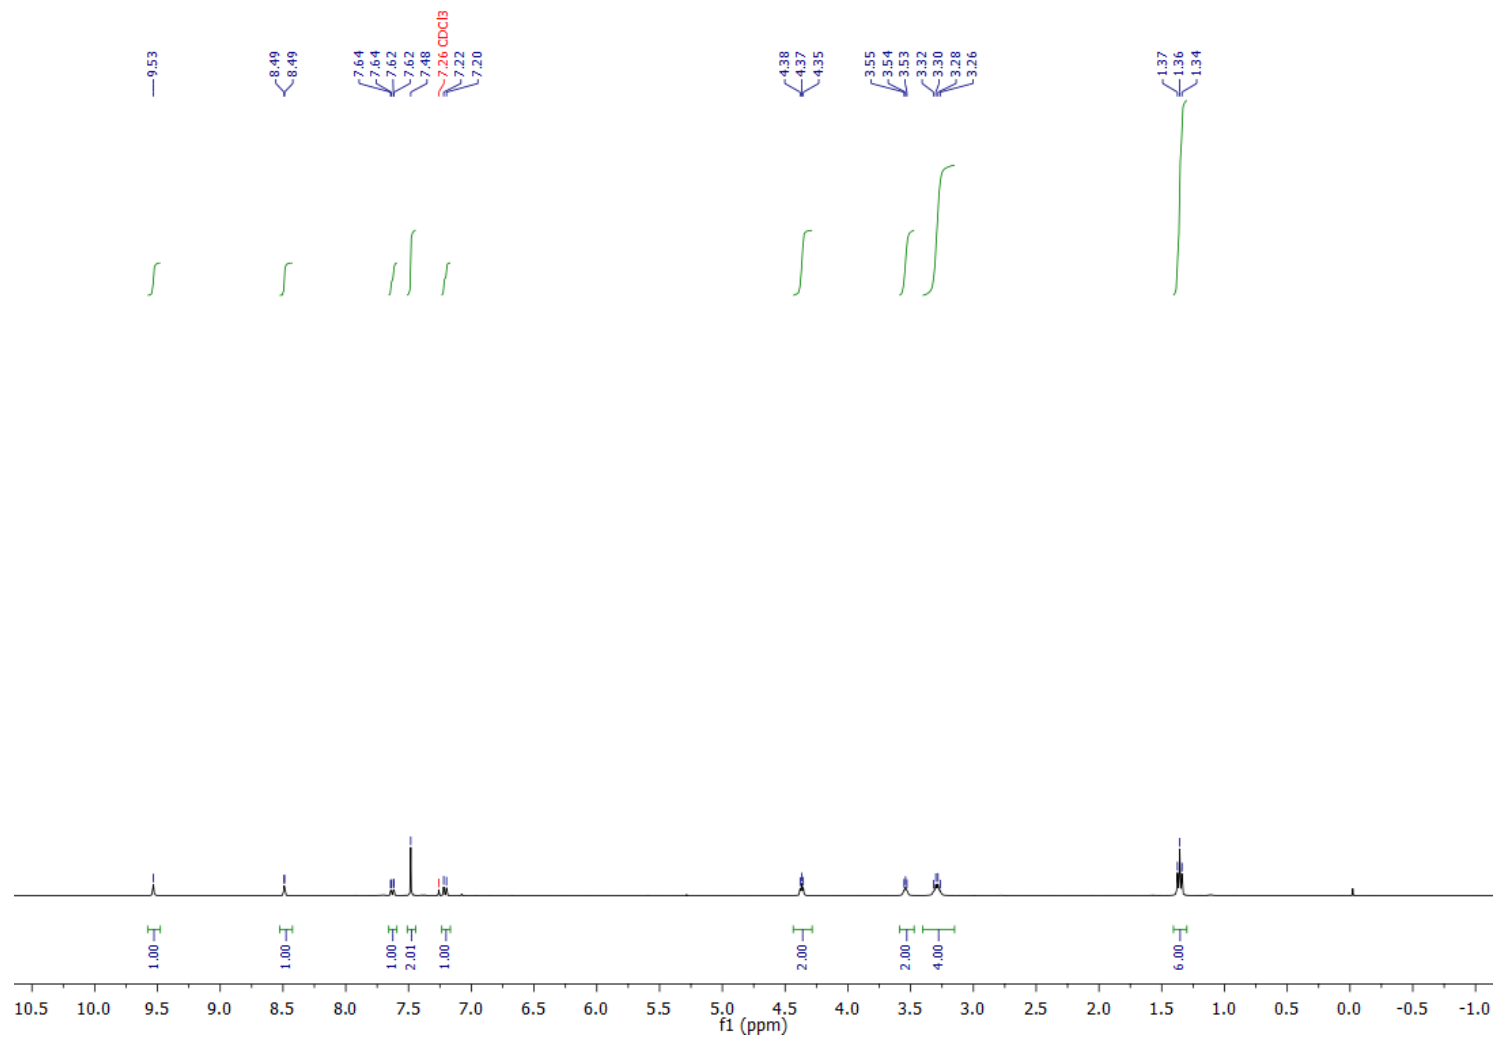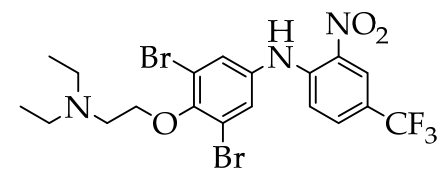



$^{13}\text{C}$  NMR (101 MHz,  $\text{CDCl}_3$ )  $\delta$  151.00, 144.11, 136.23, 132.75, 132.30 (q,  $J = 3.1$  Hz), 129.08, 124.88 (q,  $J = 4.1$  Hz), 123.25 (q,  $J = 271.8$  Hz), 120.85 (q,  $J = 34.6$  Hz), 119.20, 116.58, 68.46, 50.73, 47.52, 9.53; HRMS (ESI $^+$ ) for  $\text{C}_{19}\text{H}_{20}\text{Br}_2\text{F}_3\text{N}_3\text{O}_3$  ( $[\text{M}+\text{H}]^+$ ) calculated 553.9896 found 553.9894

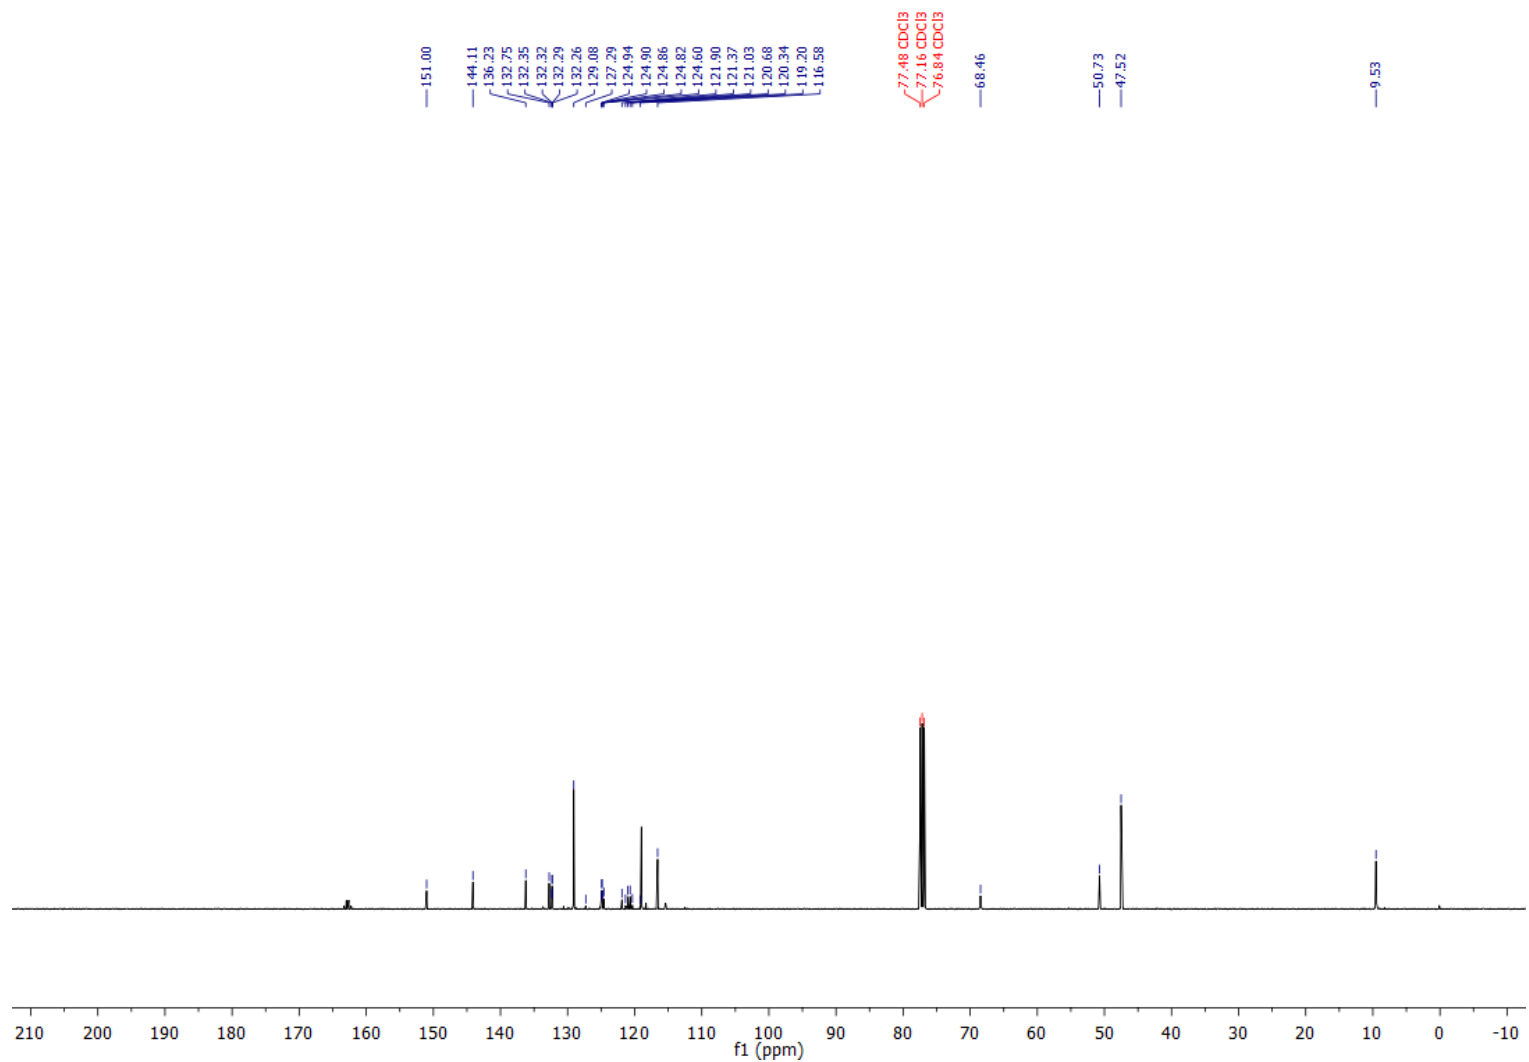

**3,5-Dichloro-4-(2-(diethylamino)ethoxy)-N-(2-nitro-4-(trifluoromethyl)phenyl)aniline (17c)**

$^1\text{H}$  NMR (400 MHz,  $\text{CDCl}_3$ )  $\delta$  9.53 (s, 1H), 8.51 (d,  $J = 1.3$  Hz, 1H), 7.62 (dd,  $J_1 = 9.0$  Hz,  $J_2 = 2.1$  Hz, 1H), 7.26 (s, 2H), 7.21 (d,  $J = 9.0$  Hz, 1H), 4.14 (t,  $J = 6.5$  Hz, 2H), 3.00 (t,  $J = 6.5$  Hz, 2H), 2.69 (q,  $J = 7.1$  Hz, 4H), 1.09 (t,  $J = 7.1$  Hz, 6H)

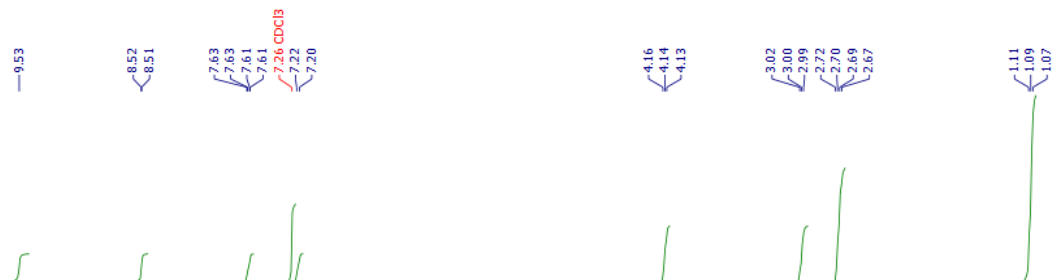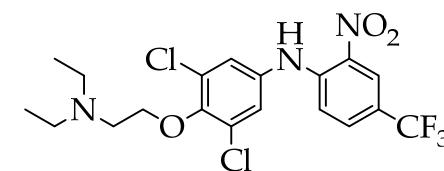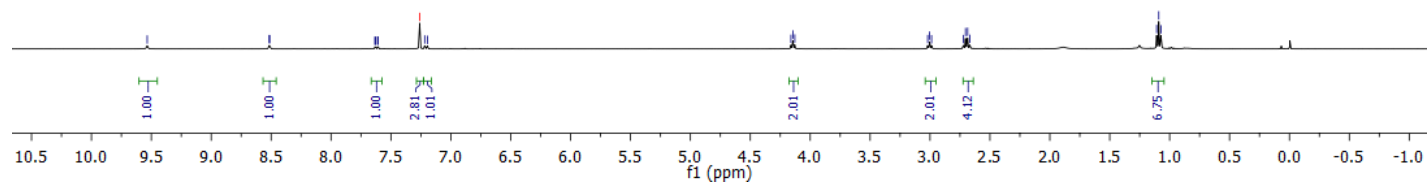

$^{13}\text{C}$  NMR (101 MHz,  $\text{CDCl}_3$ )  $\delta$  150.59, 144.51, 134.30, 132.56, 132.27 (q,  $J = 3.0$  Hz), 130.74, 125.63, 124.95 (q,  $J = 4.1$  Hz), 123.35 (q,  $J = 271.5$  Hz), 120.58 (q,  $J = 34.6$  Hz), 116.63, 72.00, 52.37, 47.64, 11.87; HRMS (ESI $^+$ ) for  $\text{C}_{19}\text{H}_{20}\text{Cl}_2\text{F}_3\text{N}_3\text{O}_3$  ( $[\text{M}+\text{H}]^+$ ) calculated 466.0903 found 466.0907

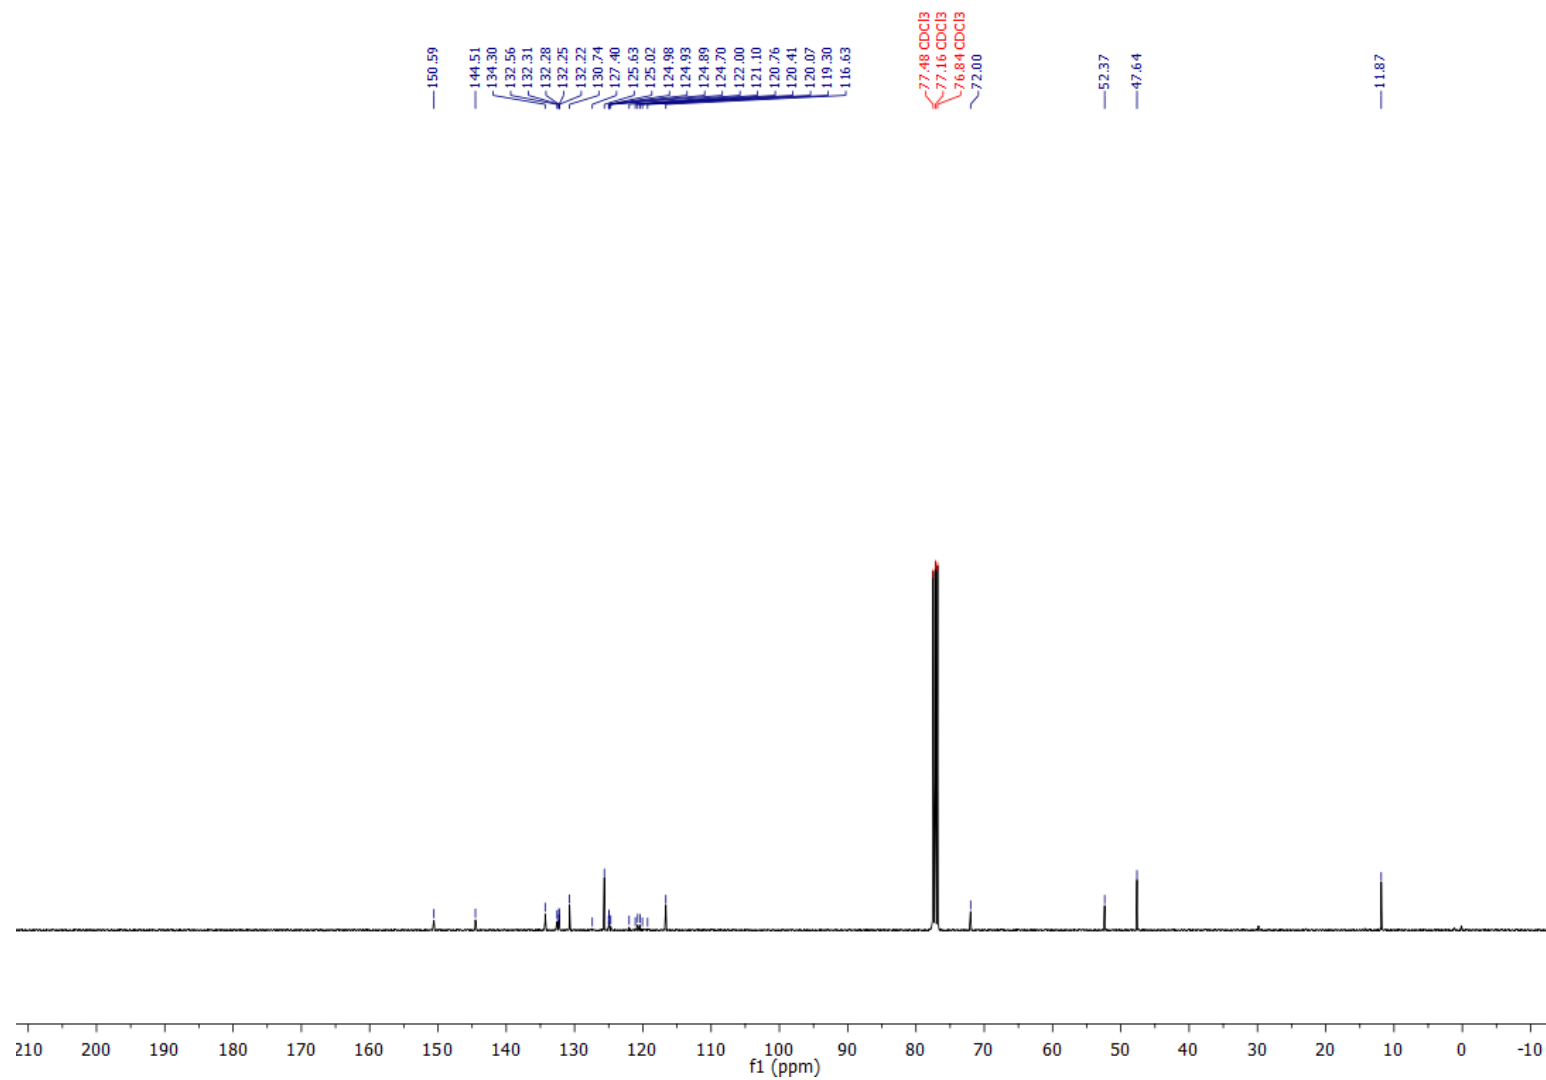

***N*-(4-(2-(Dimethylamino)ethoxy)phenyl)-2-nitro-4-(trifluoromethyl)aniline (18a)**

$^1\text{H}$  NMR (400 MHz,  $\text{CDCl}_3$ )  $\delta$  9.61 (s, 1H), 8.50 (d,  $J = 1.1$  Hz, 1H), 7.49 (dd,  $J_1 = 9.1$  Hz,  $J_2 = 2.1$  Hz, 1H), 7.22 – 7.14 (m, 2H), 7.08 – 6.96 (m, 3H), 4.11 (t,  $J = 5.7$  Hz, 2H), 2.78 (t,  $J = 5.7$  Hz, 2H), 2.38 (s, 6H)

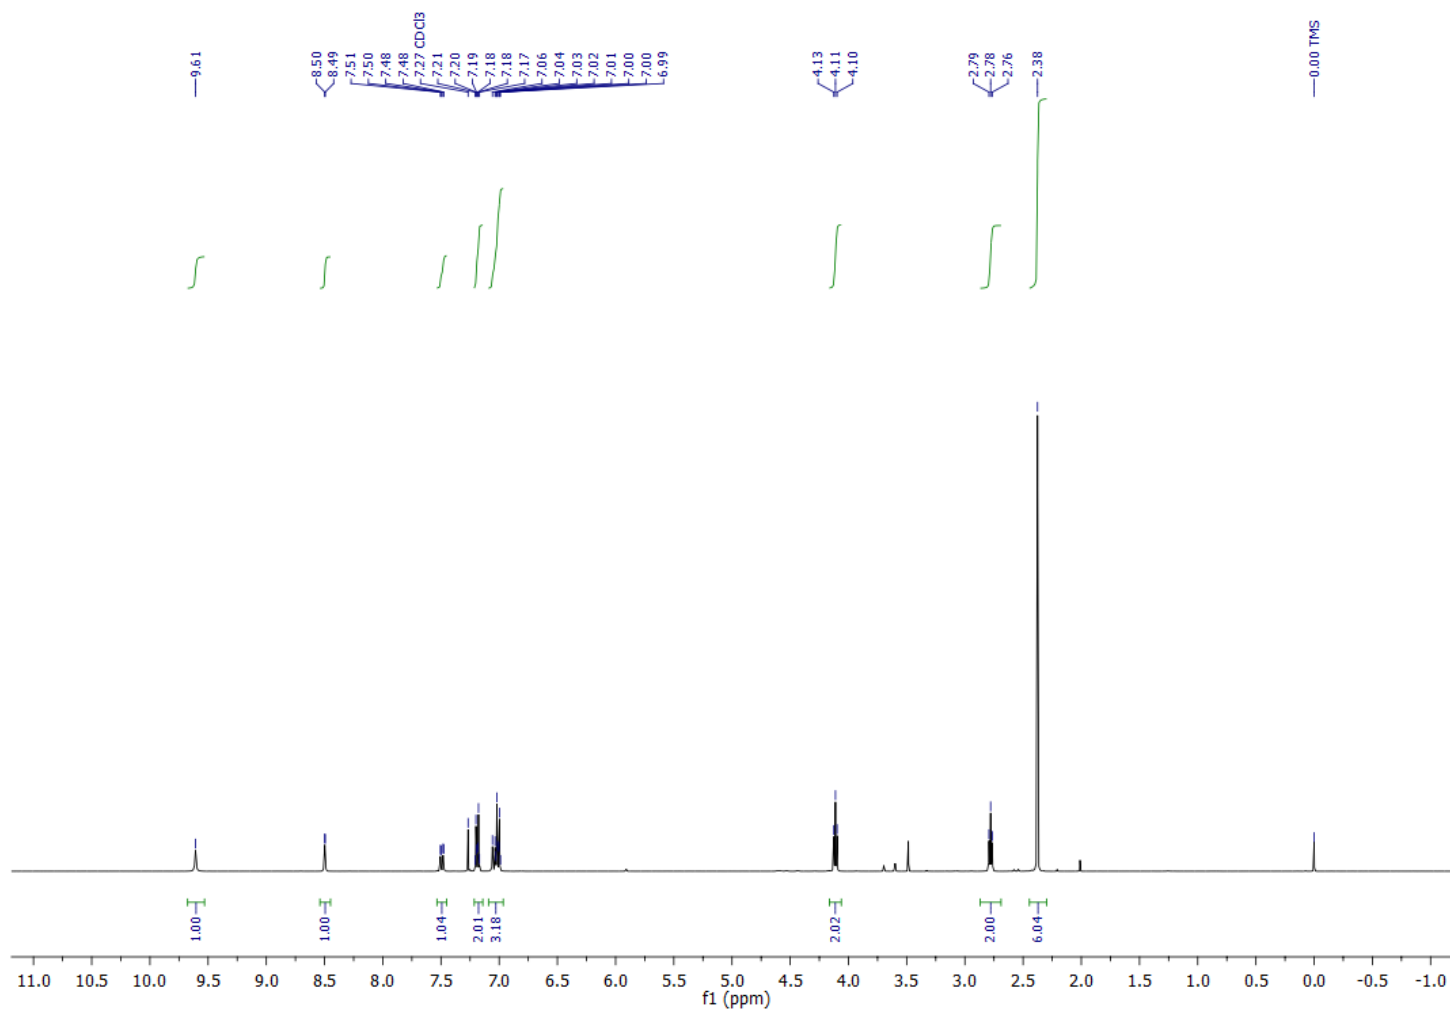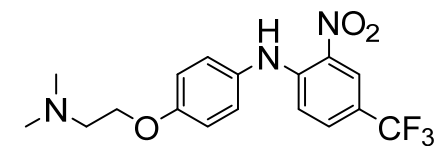

$^{13}\text{C}$  NMR (101 MHz,  $\text{CDCl}_3$ )  $\delta$  158.01, 146.48, 131.83 (q,  $J = 3.1$  Hz), 131.42, 130.19, 127.52, 124.85 (q,  $J = 4.3$  Hz), 123.61 (q,  $J = 271.0$  Hz), 118.89 (q,  $J = 34.4$  Hz), 116.65, 116.00, 66.46, 58.37, 46.05; HRMS (ESI $^+$ ) for  $\text{C}_{17}\text{H}_{19}\text{F}_3\text{N}_3\text{O}_3$  ( $[\text{M}+\text{H}]^+$ ) calculated 370.1373 found 370.1368

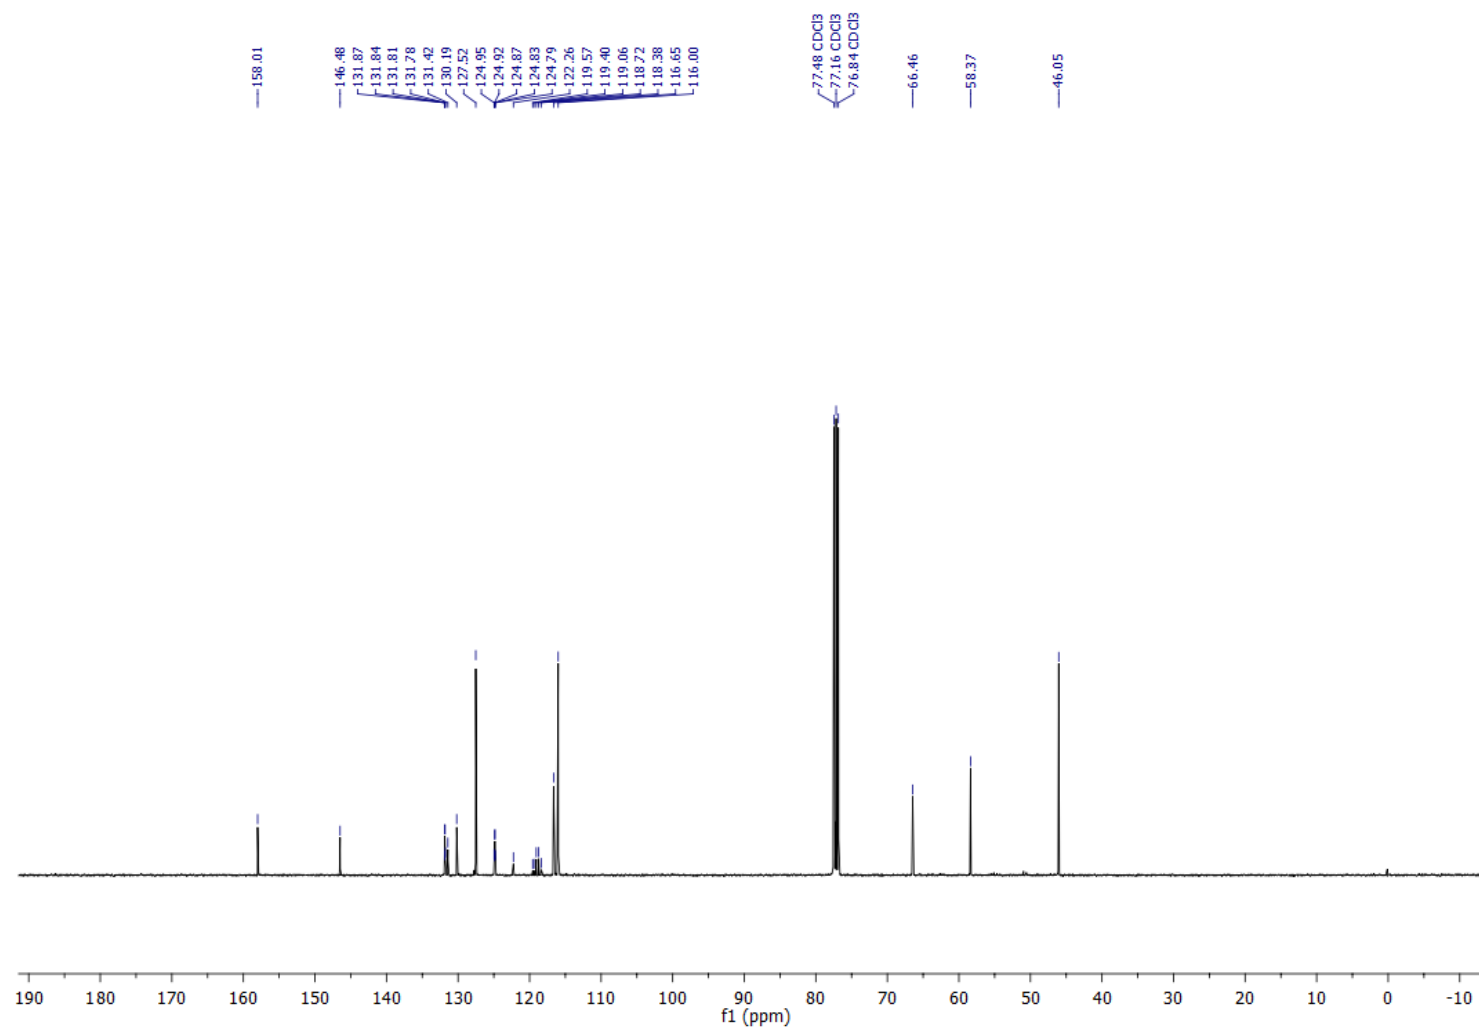

**3,5-Dibromo-4-(2-(dimethylamino)ethoxy)-N-(2-nitro-4-(trifluoromethyl)phenyl)aniline (18b)**

$^1\text{H}$  NMR (400 MHz,  $\text{CDCl}_3$ )  $\delta$  9.54 (s, 1H), 8.51 (d,  $J = 1.3$  Hz, 1H), 7.62 (dd,  $J_1 = 9.0$  Hz,  $J_2 = 2.0$  Hz, 1H), 7.47 (s, 2H), 7.20 (d,  $J = 9.0$  Hz, 1H), 4.14 (t,  $J = 5.9$  Hz, 2H), 2.85 (t,  $J = 5.9$  Hz, 2H), 2.39 (s, 6H)

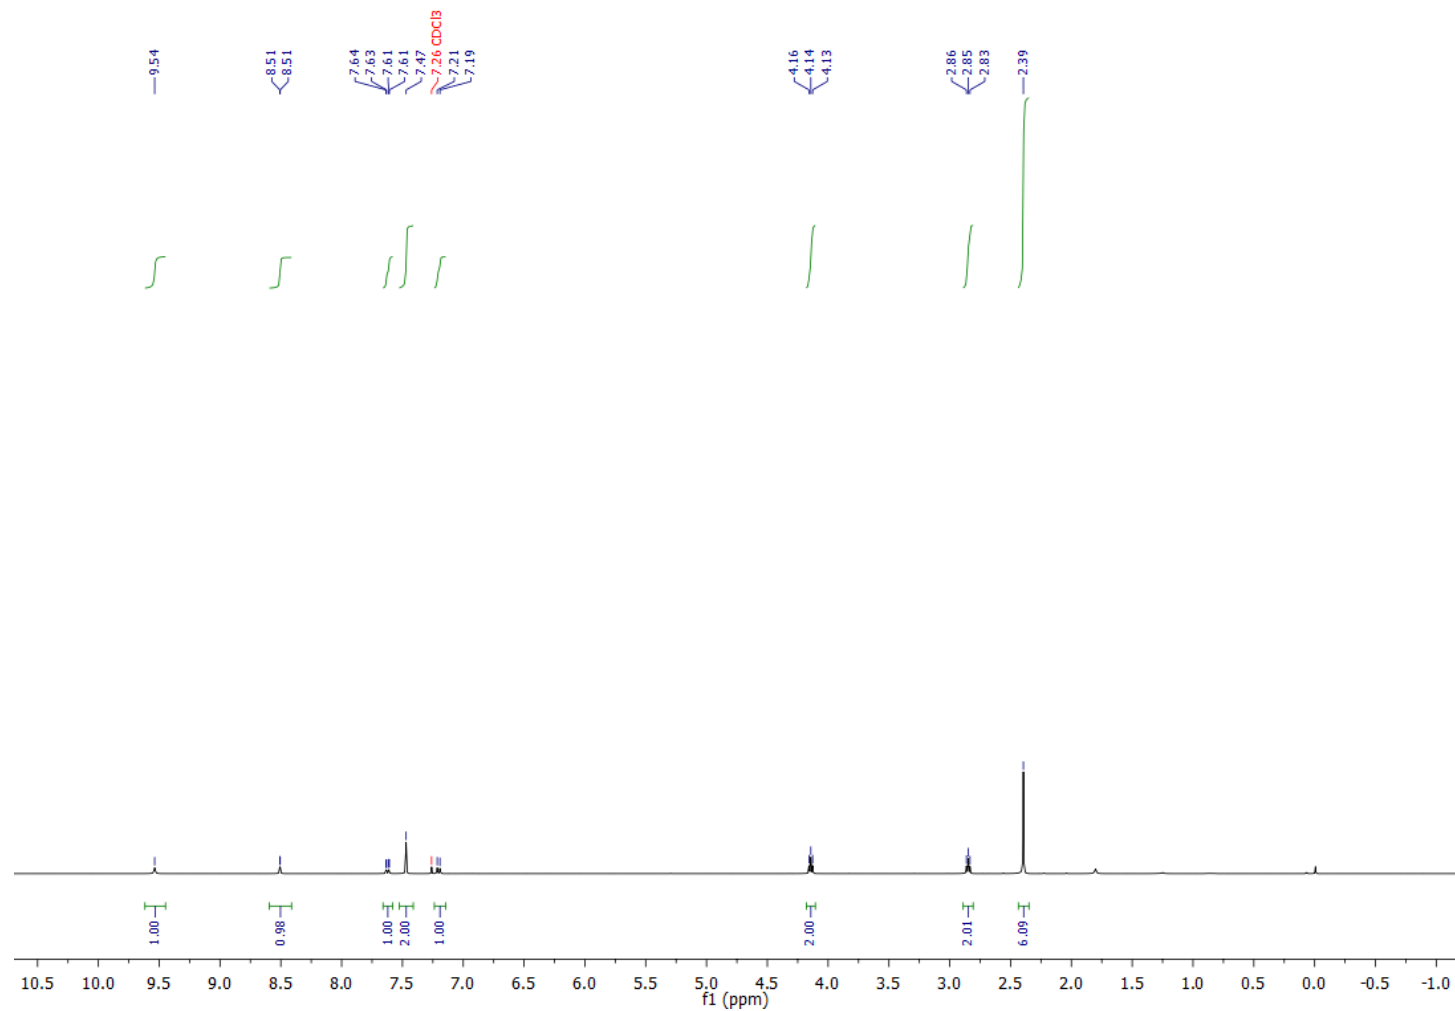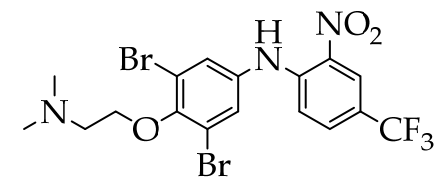

$^{13}\text{C}$  NMR (101 MHz,  $\text{CDCl}_3$ )  $\delta$  152.41, 144.49, 135.27, 132.54, 132.27 (q,  $J = 3.1$  Hz), 129.30, 124.93 (q,  $J = 4.1$  Hz), 123.34 (d,  $J = 271.2$  Hz), 120.59 (q,  $J = 34.6$  Hz), 119.31, 116.61, 71.35, 58.87, 46.00; HRMS (ESI $^+$ ) for  $\text{C}_{17}\text{H}_{16}\text{Br}_2\text{F}_3\text{N}_3\text{O}_3$  ( $[\text{M}+\text{H}]^+$ ) calculated 525.9583 found 525.9580

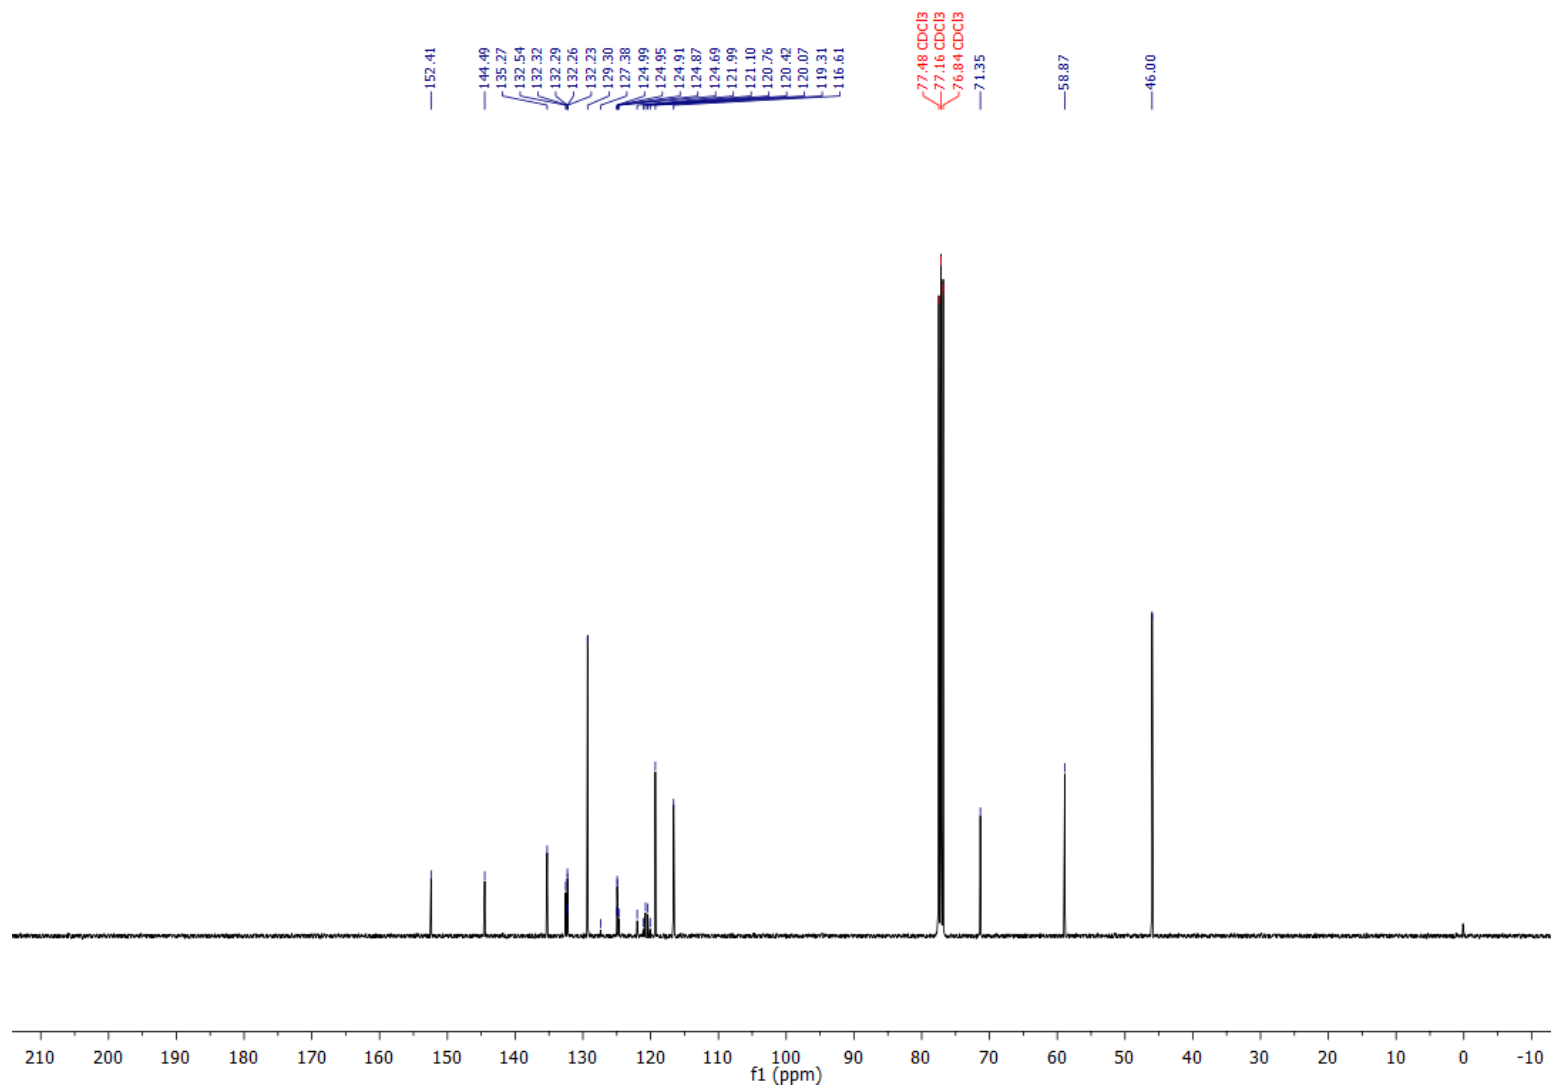

**3,5-Dichloro-4-(2-(dimethylamino)ethoxy)-N-(2-nitro-4-(trifluoromethyl)phenyl)aniline (18c)**

$^1\text{H}$  NMR (400 MHz,  $\text{CDCl}_3$ )  $\delta$  9.53 (s, 1H), 8.51 (d,  $J = 1.4$  Hz, 1H), 7.62 (dd,  $J_1 = 9.0$  Hz,  $J_2 = 2.1$  Hz, 1H), 7.26 (s, 2H), 7.21 (d,  $J = 9.0$  Hz, 1H), 4.15 (t,  $J = 5.8$  Hz, 2H), 2.82 (t,  $J = 5.8$  Hz, 2H), 2.38 (s, 6H)

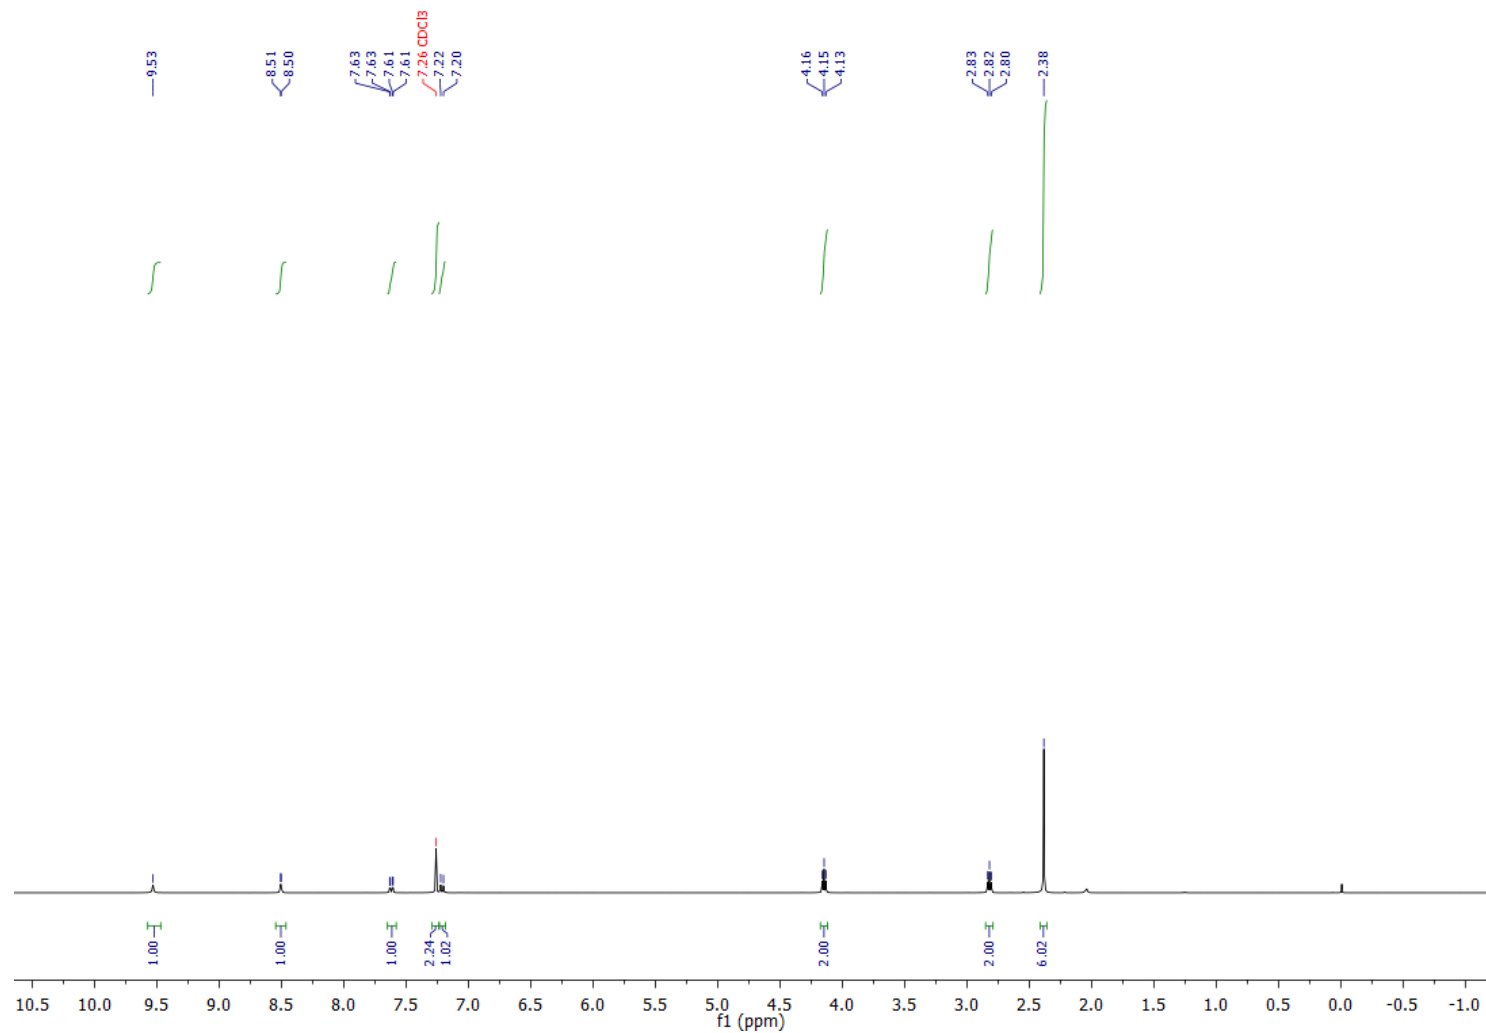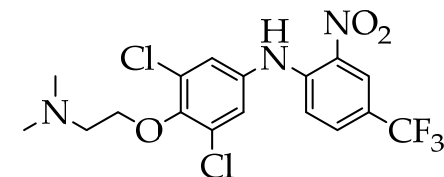



$^{13}\text{C}$  NMR (101 MHz,  $\text{CDCl}_3$ )  $\delta$  150.46, 144.45, 134.38, 132.55, 132.24 (q,  $J = 3.1$  Hz), 130.76, 125.57, 124.92 (q,  $J = 4.2$  Hz), 123.33 (q,  $J = 271.3$  Hz), 120.56 (q,  $J = 34.6$  Hz), 116.63, 71.51, 58.89, 45.93; HRMS (ESI $^+$ ) for  $\text{C}_{17}\text{H}_{16}\text{Cl}_2\text{F}_3\text{N}_3\text{O}_3$  ( $[\text{M}+\text{H}]^+$ ) calculated 438.0594 found 438.0591

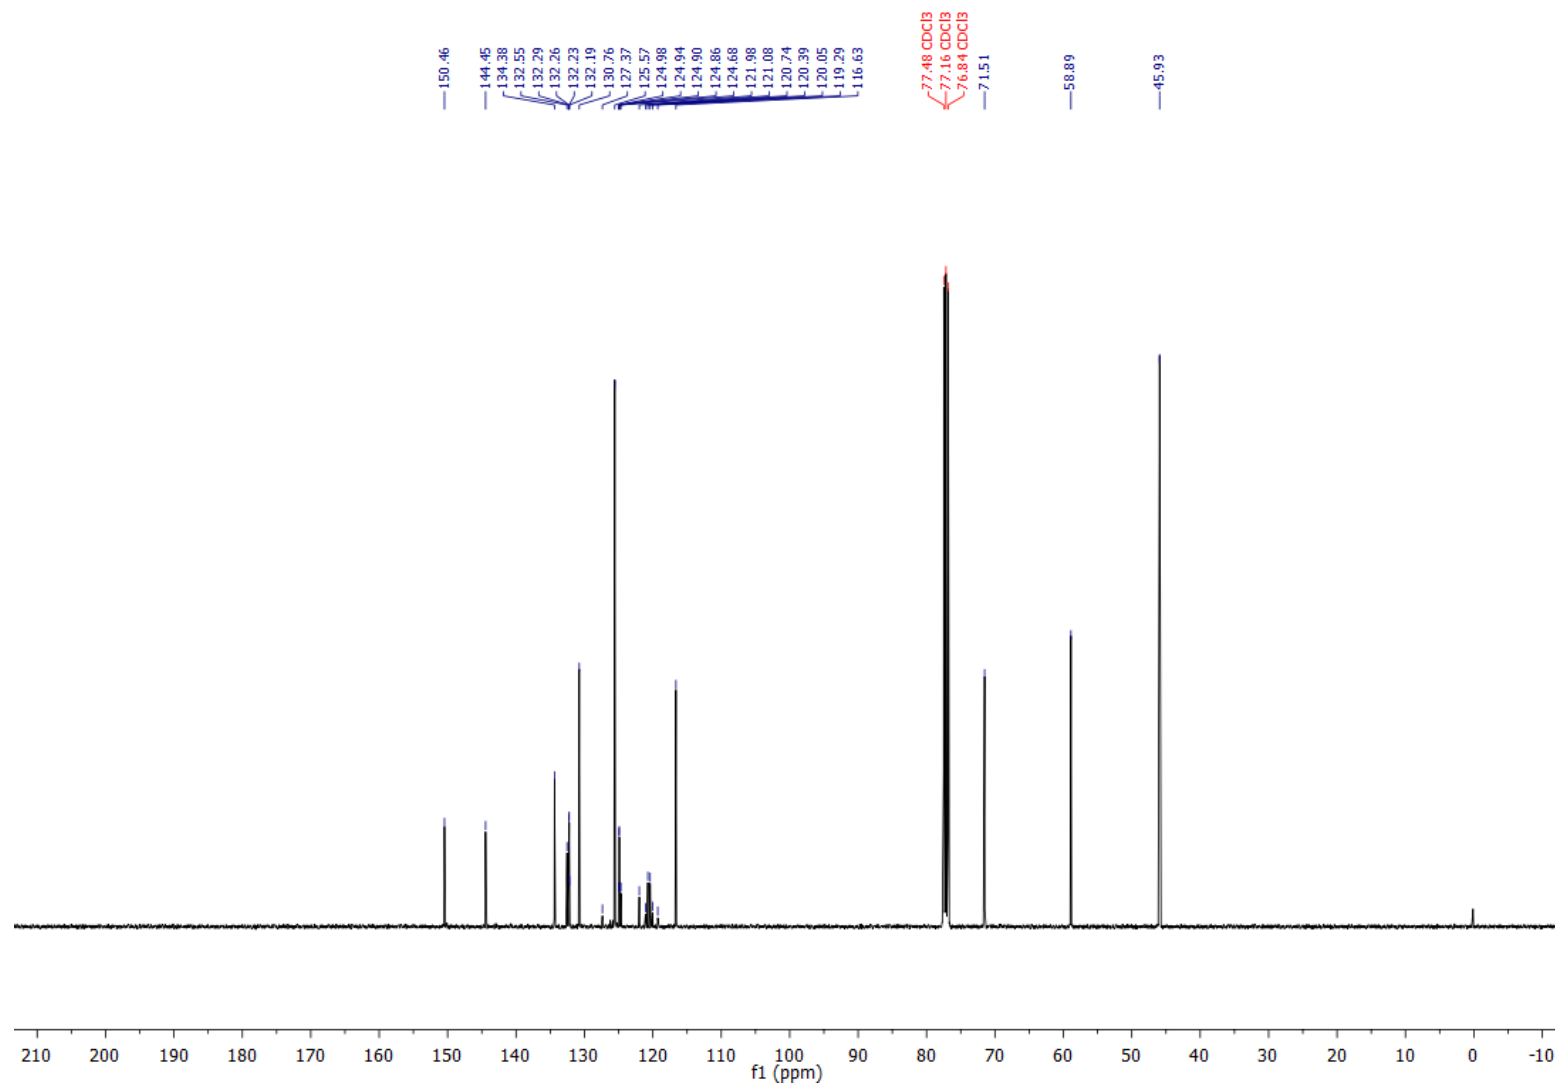

**2-Nitro-*N*-(4-(2-(pyrrolidin-1-yl)ethoxy)phenyl)-4-(trifluoromethyl)aniline (19)**

$^1\text{H}$  NMR (400 MHz,  $\text{CDCl}_3$ )  $\delta$  9.60 (s, 1H), 8.49 (d,  $J = 1.6$  Hz, 1H), 7.48 (dd,  $J_1 = 9.1$  Hz,  $J_2 = 2.1$  Hz, 1H), 7.21 – 7.13 (m, 2H), 7.04 (d,  $J = 9.1$  Hz, 1H), 7.02 – 6.93 (m, 2H), 4.15 (t,  $J = 5.9$  Hz, 2H), 2.95 (t,  $J = 5.9$  Hz, 2H), 2.67 (t,  $J = 6.6$  Hz, 4H), 1.84 (h,  $J = 3.2$  Hz, 4H)

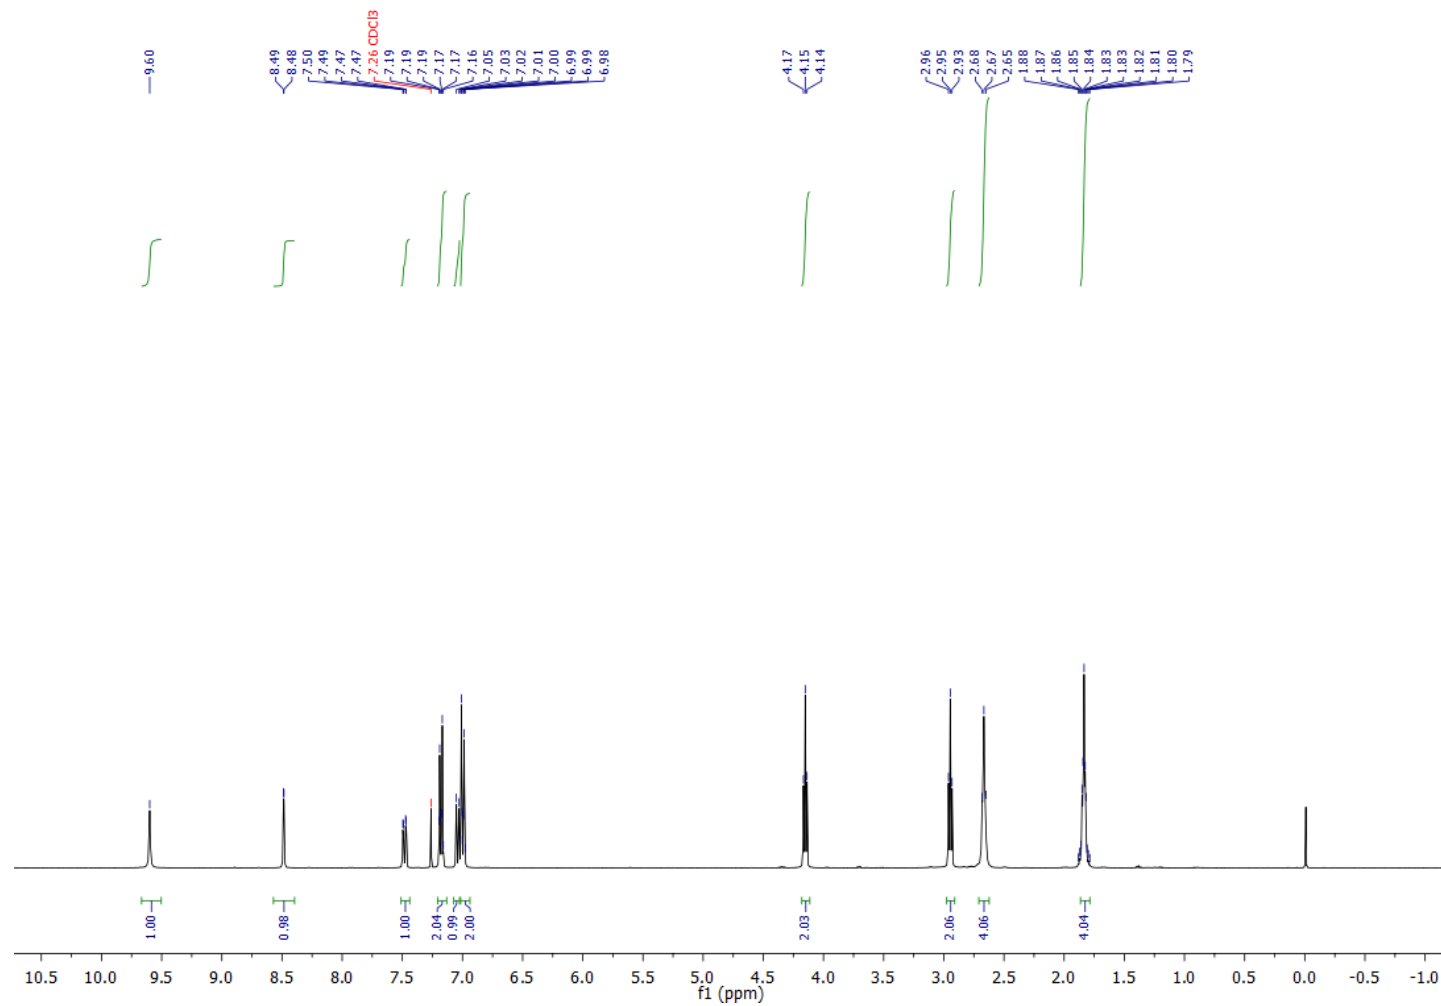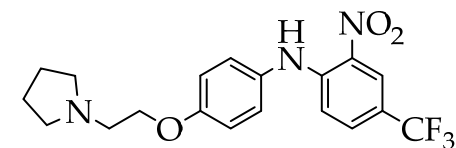

$^{13}\text{C}$  NMR (101 MHz,  $\text{CDCl}_3$ )  $\delta$  158.00, 146.47, 131.81 (q,  $J = 3.1$  Hz), 131.40, 130.14, 127.52, 124.93 (d,  $J = 271.6$  Hz), 124.83 (q,  $J = 4.3$  Hz), 118.86 (q,  $J = 34.4$  Hz), 116.64, 116.00, 67.52, 55.14, 54.90, 23.63; HRMS (ESI $^+$ ) for  $\text{C}_{19}\text{H}_{20}\text{F}_3\text{N}_3\text{O}_3$  ( $[\text{M}+\text{H}]^+$ ) calculated 396.15295 found 396.15260

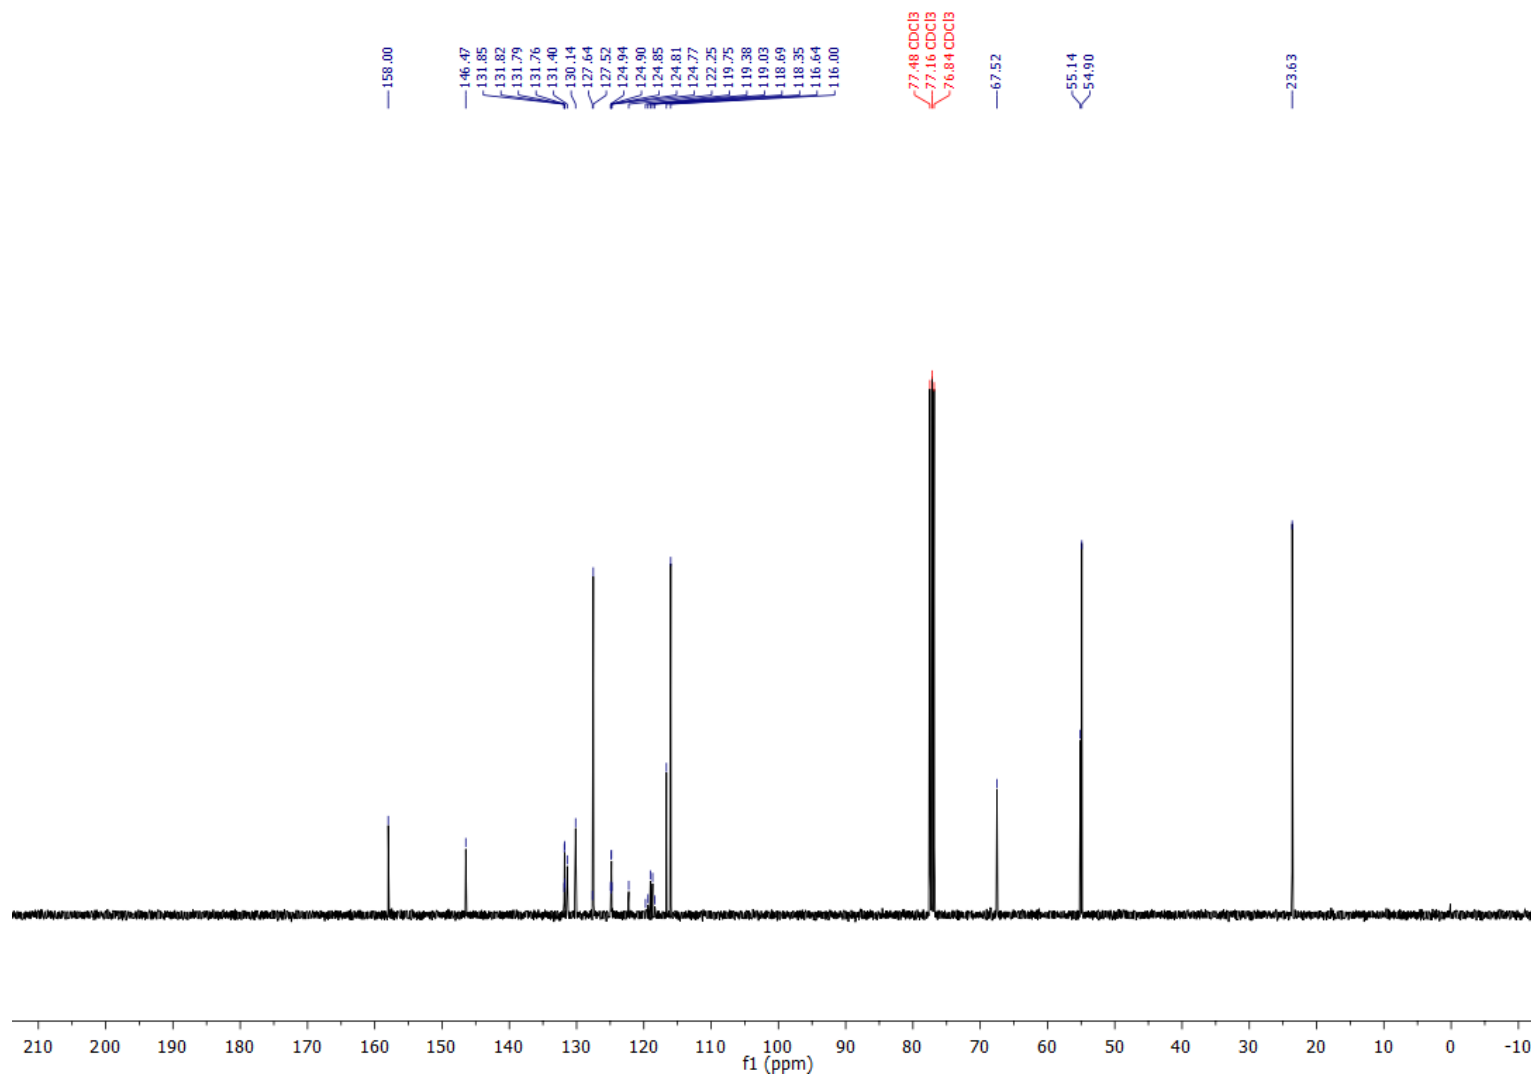

**2-Nitro-*N*-(4-(2-(piperidin-1-yl)ethoxy)phenyl)-4-(trifluoromethyl)aniline (20)**

$^1\text{H}$  NMR (400 MHz,  $\text{CDCl}_3$ )  $\delta$  9.60 (s, 1H), 8.49 (d,  $J = 1.3$  Hz, 1H), 7.48 (dd,  $J_1 = 9.1$  Hz,  $J_2 = 2.2$  Hz, 1H), 7.22 – 7.13 (m, 2H), 7.04 (d,  $J = 9.1$  Hz, 1H), 7.01 – 6.94 (m, 2H), 4.13 (t,  $J = 6.0$  Hz, 2H), 2.79 (t,  $J = 6.0$  Hz, 2H), 2.52 (s, 4H), 1.62 (p,  $J = 5.6$  Hz, 4H), 1.46 (q,  $J = 5.9$  Hz, 2H)

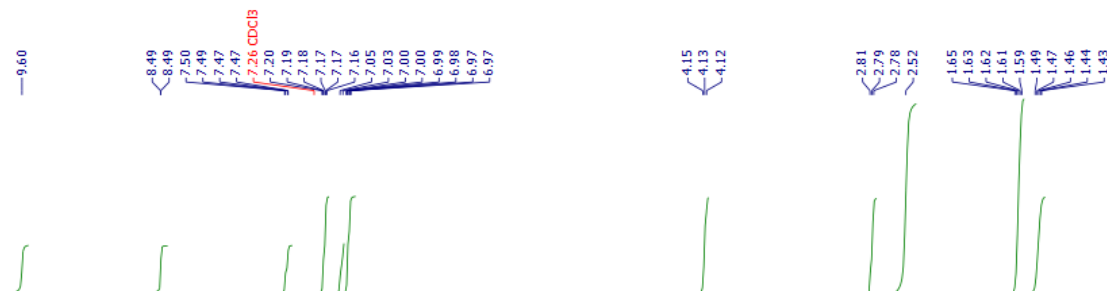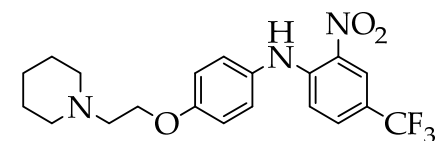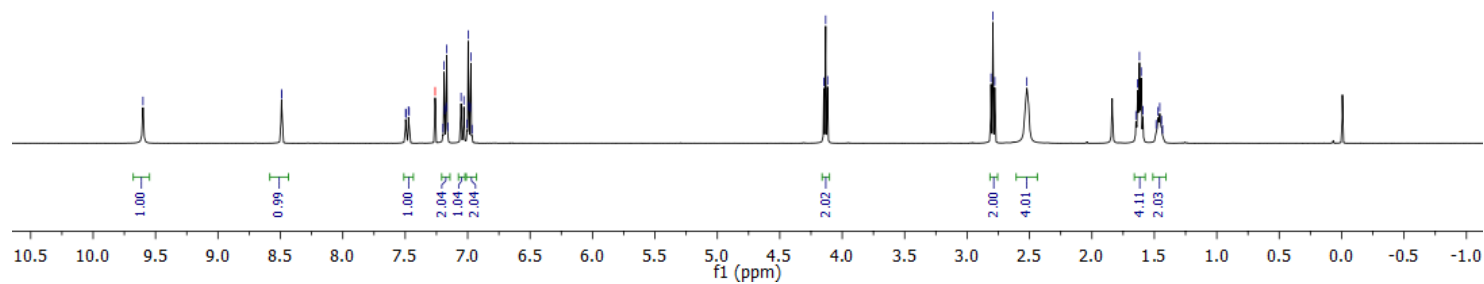

$^{13}\text{C}$  NMR (101 MHz,  $\text{CDCl}_3$ )  $\delta$  158.04, 146.49, 131.81 (q,  $J = 3.1$  Hz), 131.41, 130.11, 127.52, 124.85 (q,  $J = 4.3$  Hz), 123.61 (q,  $J = 271.0$  Hz), 118.88 (q,  $J = 34.4$  Hz), 116.65, 116.02, 66.53, 58.03, 55.26, 26.09, 24.32; HRMS (ESI $^+$ ) for  $\text{C}_{20}\text{H}_{22}\text{F}_3\text{N}_3\text{O}_3$  ( $[\text{M}+\text{H}]^+$ ) calculated 410.1686 found 410.1682

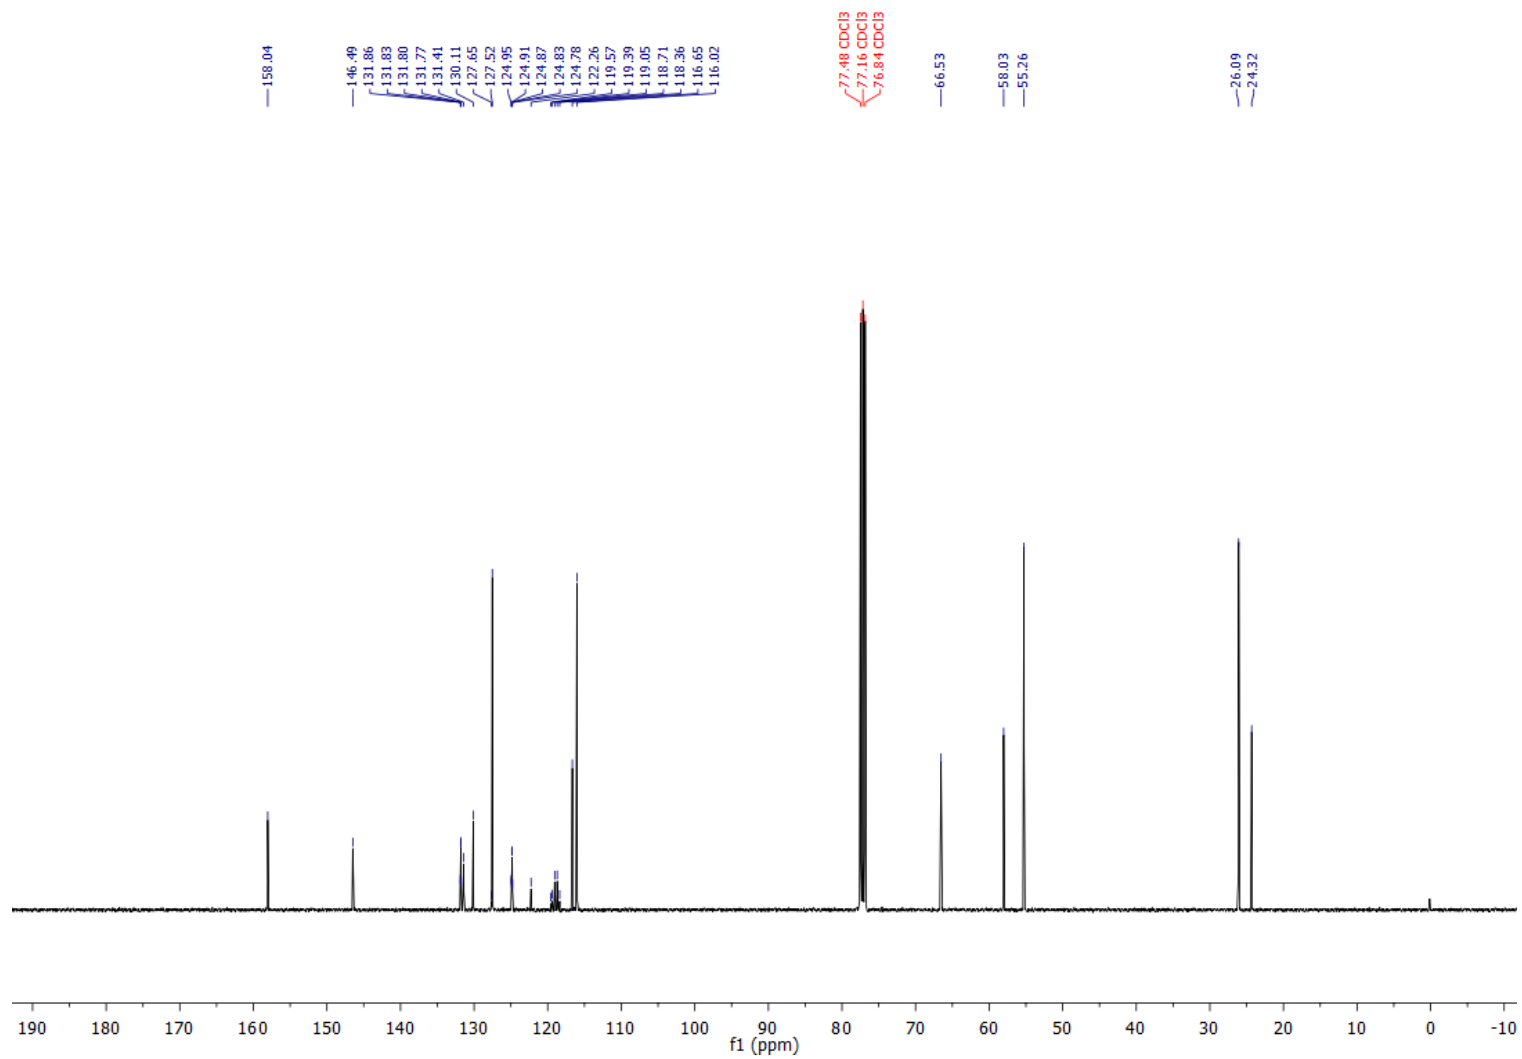

***N*-(4-(2-(Azepan-1-yl)ethoxy)phenyl)-2-nitro-4-(trifluoromethyl)aniline (21)**

$^1\text{H}$  NMR (400 MHz,  $\text{CDCl}_3$ )  $\delta$  9.60 (s, 1H), 8.49 (d,  $J = 1.4$  Hz, 1H), 7.48 (dd,  $J_1 = 9.1$  Hz,  $J_2 = 2.1$  Hz, 1H), 7.21 – 7.15 (m, 2H), 7.04 (d,  $J = 9.1$  Hz, 1H), 7.01 – 6.96 (m, 2H), 4.09 (t,  $J = 6.2$  Hz, 2H), 2.98 (t,  $J = 6.2$  Hz, 2H), 2.84 – 2.74 (m, 4H), 1.75 – 1.57 (m, 8H)

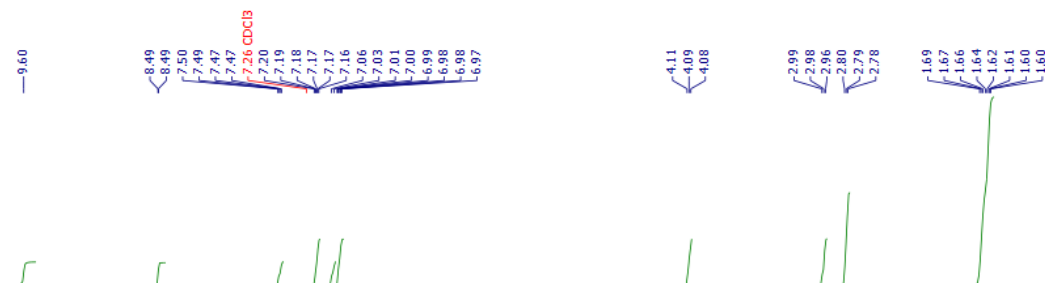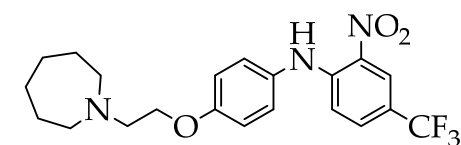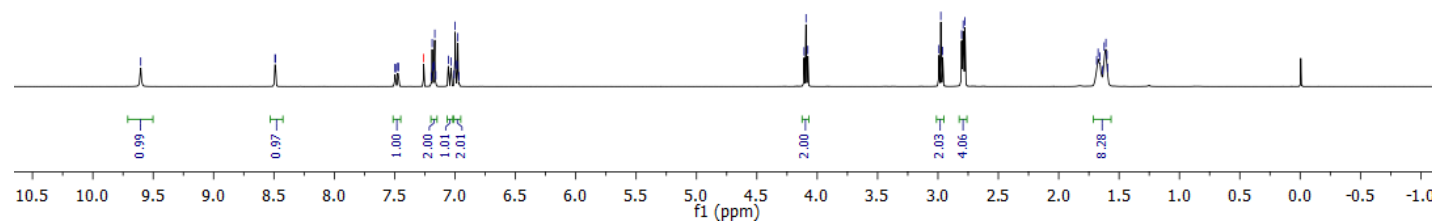

$^{13}\text{C}$  NMR (101 MHz,  $\text{CDCl}_3$ )  $\delta$  158.14, 146.51, 131.81 (q,  $J = 3.0$  Hz), 131.41, 130.05, 127.52, 124.85 (q,  $J = 4.3$  Hz), 123.61 (q,  $J = 271.0$  Hz), 118.87 (q,  $J = 34.4$  Hz), 116.65, 116.02, 67.09, 56.41, 56.05, 28.10, 27.21; HRMS (ESI $^+$ ) for  $\text{C}_{21}\text{H}_{24}\text{F}_3\text{N}_3\text{O}_3$  ( $[\text{M}+\text{H}]^+$ ) calculated 424.1843 found 424.1837

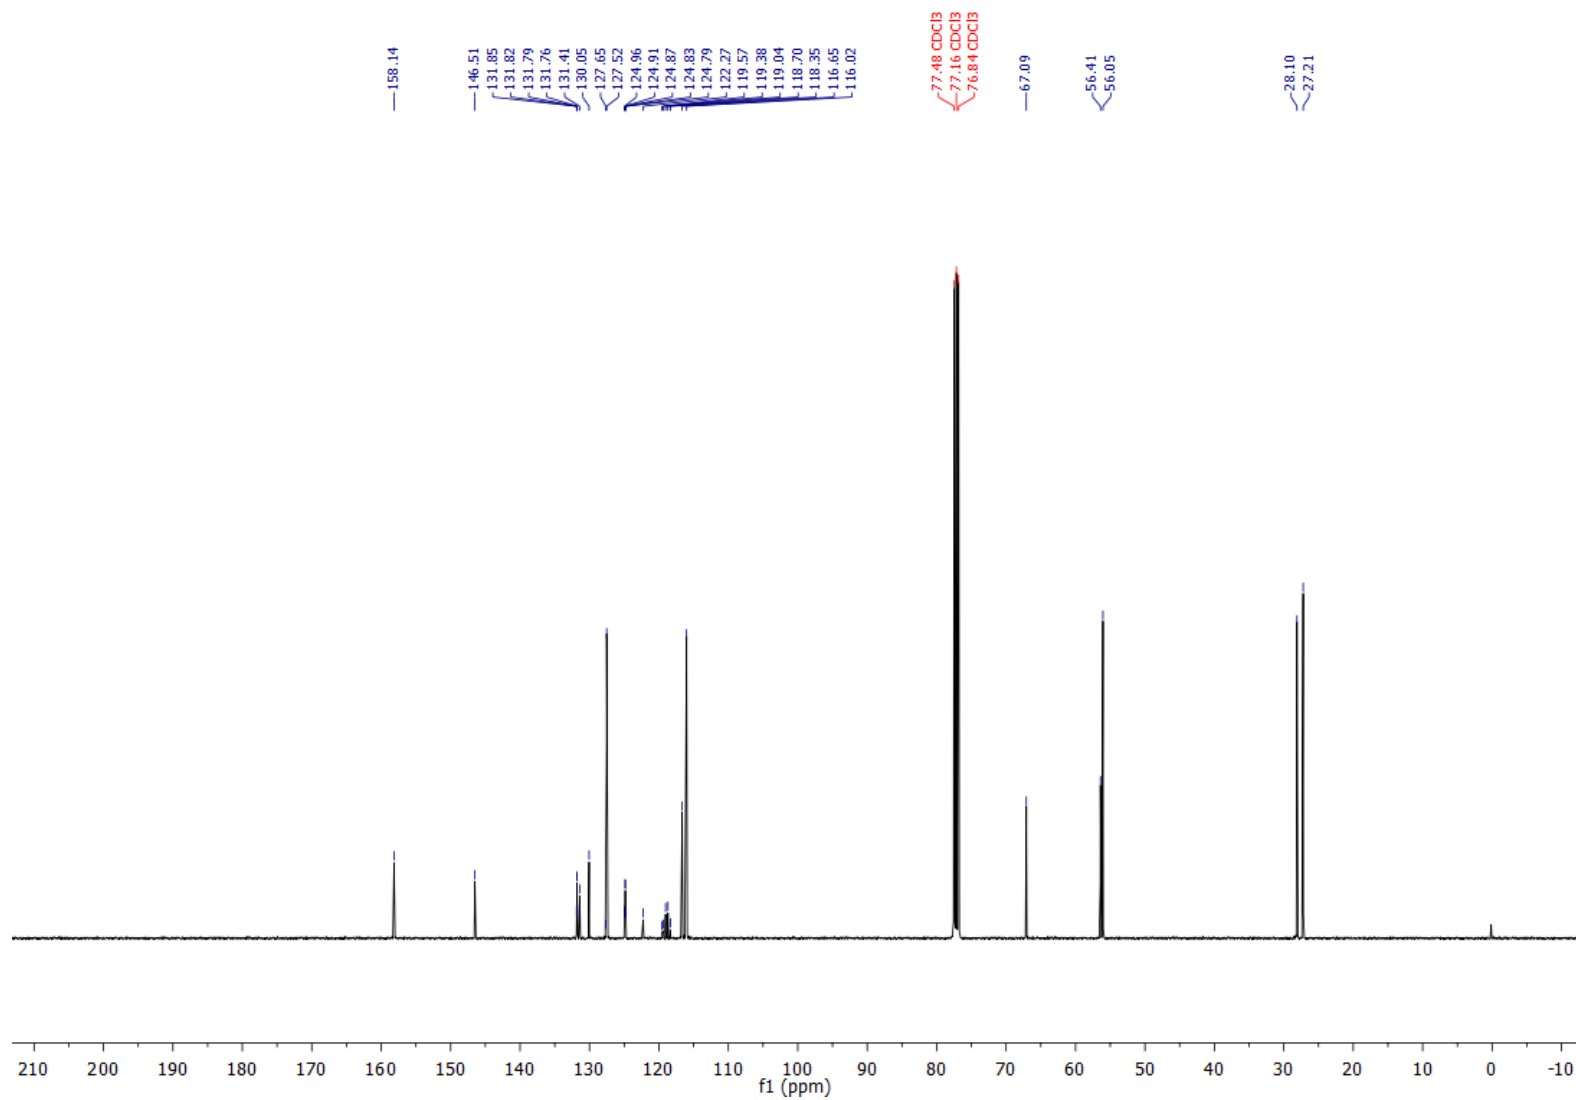

Supplement: s1 [file s1]
